1 **Gastrointestinal involvement attenuates COVID-19 severity and mortality**

2  
3 **Authors:** Alexandra E. Livanos<sup>1,2\*</sup>, Divya Jha<sup>1,2\*</sup>, Francesca Cossarini<sup>1,3\*</sup>, Ana S. Gonzalez-  
4 Reiche<sup>4\*</sup> Minami Tokuyama<sup>1,2\*</sup>, Teresa Aydillo<sup>5,15\*</sup>, Tommaso L. Parigi<sup>6\*</sup>, Irene Ramos<sup>7</sup>, Katie  
5 Dunleavy<sup>8</sup>, Brian Lee<sup>9</sup>, Rebekah Dixon<sup>2</sup>, Steven T. Chen<sup>1,10</sup>, Gustavo Martinez-Delgado<sup>1,2</sup>, Satish  
6 Nagula<sup>2</sup>, Huaibin M. Ko<sup>2,11</sup>, Jason Reidy<sup>11</sup>, Steven Naymagon<sup>2</sup>, Ari Grinspan<sup>2</sup>, Jawad Ahmad<sup>2</sup>,  
7 Michael Tankelevich<sup>1,2</sup>, Ronald Gordon<sup>11</sup>, Keshav Sharma<sup>1,2</sup>, Graham J. Britton<sup>1,12</sup>, Alice Chen-  
8 Liaw<sup>1,12</sup>, Matthew P. Spindler<sup>1,12</sup>, Tamar Plitt<sup>1,12</sup>, Pei Wang<sup>4</sup>, Andrea Cerutti<sup>1,13,14</sup>, Jeremiah J.  
9 Faith<sup>1,12</sup>, Jean-Frederic Colombel<sup>1,2</sup>, Ephraim Kenigsberg<sup>1,4</sup>, Carmen Argmann<sup>4</sup>, Miriam  
10 Merad<sup>1,8,9,10</sup>, Sacha Gnjatic<sup>1,8,9,10,11</sup>, Noam Harpaz<sup>11</sup>, Silvio Danese<sup>6</sup>, Adeb Rahman<sup>1,4,9,10</sup>, Nikhil  
11 A. Kumta<sup>2</sup>, Alessio Aghemo<sup>6</sup>, Francesca Petralia<sup>4†</sup>, Harm van Bakel<sup>4,12†</sup>, Adolfo Garcia-  
12 Sastre<sup>3,5,15†</sup> and Saurabh Mehandru<sup>1,2†</sup>

13  
14 \* These authors contributed equally to this work.

15 † These authors contributed equally to this work.

16  
17  
18  
19

20 Please address correspondence to:

21 [saurabh.mehandru@mssm.edu](mailto:saurabh.mehandru@mssm.edu),

22 [adolfo.Garcia-Sastre@mssm.edu](mailto:adolfo.Garcia-Sastre@mssm.edu),

23 [harm.vanbakel@mssm.edu](mailto:harm.vanbakel@mssm.edu), or

24 [francesca.Petralia@mssm.edu](mailto:francesca.Petralia@mssm.edu)

25  
26  
27  
28  
29  
30  
31  
32  
33  
34  
35  
36  
37

38 **Authors affiliations**

- 39  
40 <sup>1</sup>Precision Immunology Institute, Icahn School of Medicine at Mount Sinai, New York, NY 10029  
41 <sup>2</sup>The Dr. Henry D. Janowitz Division of Gastroenterology, Department of Medicine, Icahn School  
42 of Medicine at Mount Sinai, New York, NY 10029  
43 <sup>3</sup>Division of Infectious Disease, Department of Medicine, Icahn School of Medicine at Mount Sinai,  
44 New York, NY 10029  
45 <sup>4</sup>Department of Genetics and Genomic Sciences, Icahn School of Medicine at Mount Sinai, New  
46 York, NY 10029, USA.  
47 <sup>5</sup>Department of Microbiology, Icahn School of Medicine at Mount Sinai, New York, NY 10029  
48 <sup>6</sup>Department of Biomedical Sciences, Humanitas University, Milan, Italy.  
49 <sup>7</sup>Department of Neurology and Center for Advanced Research on Diagnostic Assays, Icahn  
50 School of Medicine at Mount Sinai, New York, New York, 10029.  
51 <sup>8</sup>Department of Medicine, Icahn School of Medicine at Mount Sinai, New York, NY 10029  
52 <sup>9</sup>Human Immune Monitoring Center (HIMC) Icahn School of Medicine at Mount Sinai New York,  
53 New York, 10029  
54 <sup>10</sup>Department of Oncological Sciences, Icahn School of Medicine at Mount Sinai, New York, NY,  
55 USA  
56 <sup>11</sup>Department of Pathology, Icahn School of Medicine at Mount Sinai, New York, NY 10029  
57 <sup>12</sup>Icahn Institute for Data Science and Genomic Technology, Icahn School of Medicine at Mount  
58 Sinai, New York, NY, 10029  
59 <sup>13</sup>Catalan Institute for Research and Advanced Studies (ICREA), Barcelona, Spain  
60 <sup>14</sup>Program for Inflammatory and Cardiovascular Disorders, Institut Hospital del Mar  
61 d'Investigacions Mèdiques (IMIM), Barcelona, Spain  
62 <sup>15</sup>Global Health and Emerging Pathogens Institute, Icahn School of Medicine at Mount Sinai, New  
63 York, NY, USA.

64  
65  
66 A.E.L.: Gastroenterology Fellow, D.J.: Postdoctoral Fellow, F.C.: Assistant Professor, A.S.G-R.:  
67 Postdoctoral Fellow, M.T.: MD candidate, T.A.: Instructor, T.L.P.: Gastroenterology Fellow, I.R.:  
68 Assistant Professor, K.D.: Internal Medicine Resident, B.L.: Computational Scientist, R.D.: Senior  
69 Research Coordinator, S.T.C.: MD/PhD candidate, G.M.D.: Research manager, S.N.: Associate  
70 Professor, H.M.K.: Assistant Professor, J.R.: Electron Microscopist, S.N.: Assistant Professor,  
71 A.G.: Assistant Professor, J.A.: Professor, M.T.: Research Coordinator, R.G.: Research  
72 Professor, K.S.: Master's candidate, G.J.B.: Instructor, A.C.L.: MD/PhD candidate, M.P.S.:  
73 MD/PhD candidate, T.P.: PhD candidate, P.W.: Professor, A.C.: Professor, J.J.F.: Associate  
74 Professor, J.F.C.: Professor, E.K.: Assistant Professor, C.A.: Associate Professor, M.M.:  
75 Professor, S.G.: Associate Professor, N.H.: Professor, S.D.: Professor, A.R.: Associate Professor,  
76 N.A.K.: Associate Professor, A.A.: Associate Professor, F.P.: Assistant Professor, H.V.B.:  
77 Assistant Professor, A.G.S.: Professor, S.M.: Associate Professor.

78  
79  
80  
81  
82  
83  
84  
85

86 **Abstract**

87

88 Given that gastrointestinal (GI) symptoms are a prominent extrapulmonary manifestation of  
89 coronavirus disease 2019 (COVID-19), we investigated the impact of GI infection on disease  
90 pathogenesis in three large cohorts of patients in the United States and Europe. Unexpectedly,  
91 we observed that GI involvement was associated with a significant reduction in disease severity  
92 and mortality, with an accompanying reduction in key inflammatory proteins including IL-6,  
93 CXCL8, IL-17A and CCL28 in circulation. In a fourth cohort of COVID-19 patients in which GI  
94 biopsies were obtained, we identified severe acute respiratory syndrome coronavirus-2 (SARS-  
95 CoV-2) within small intestinal enterocytes for the first time *in vivo* but failed to obtain culturable  
96 virus. High dimensional analyses of GI tissues confirmed low levels of cellular inflammation in the  
97 GI lamina propria and an active downregulation of key inflammatory genes including *IFNG*,  
98 *CXCL8*, *CXCL2* and *IL1B* among others. These data draw attention to organ-level heterogeneity  
99 in disease pathogenesis and highlight the role of the GI tract in attenuating SARS-CoV-2-  
100 associated inflammation with related mortality benefit.

101

102

103

104

105

106

107

108

109

110

111

112

113

114

115

116

117

118

119

## 120 Introduction

121 Coronavirus disease 2019 (COVID-19), is a multisystem illness caused by severe acute  
122 respiratory syndrome coronavirus 2 (SARS-CoV-2) a recently discovered novel betacoronavirus<sup>1-  
123 3</sup>. Manifestations of COVID-19 range from asymptomatic infection to severe, life-threatening  
124 disease with end-organ damage<sup>3-5</sup>. Common symptoms of COVID-19 include fever, cough, and  
125 shortness of breath that occur within 2 to 14 days after exposure to SARS-CoV-2<sup>6</sup>. A subset of  
126 COVID-19 patients also report gastrointestinal (GI) symptoms, comprising nausea, vomiting,  
127 diarrhea, abdominal pain and/or loss of appetite<sup>7-11</sup>, which is not surprising given that the host  
128 receptor for SARS-CoV-2 (ACE2 receptor) is highly expressed on intestinal epithelium<sup>12,13</sup>.  
129 Several studies have demonstrated the presence of SARS-CoV-2 RNA in the fecal samples of  
130 infected persons<sup>11,14-17</sup> and in some cases even after clearance from respiratory samples<sup>17</sup>.  
131 Additionally, several members of the *Coronaviridae* family are known to be enterotropic, causing  
132 gastroenteritis in addition to respiratory illness<sup>18</sup>. Notably, SARS-CoV and MERS-CoV, closely  
133 related to SARS-CoV-2, have been identified in fecal samples of infected individuals<sup>19-22</sup>. Finally,  
134 the presence of GI involvement by SARS-CoV-2 has also been suggested by epidemiological<sup>23</sup>,  
135 clinical<sup>24</sup>, non-human primate<sup>25</sup> and *in vitro*<sup>26-29</sup> data. However, to date there is no evidence of  
136 SARS-CoV-2 infection of human enterocytes *in vivo* and there are no studies on the responses  
137 of the GI immune system, arguably the largest in the body, in COVID-19 patients.

138 Immune dysregulation has been suggested as a primary driver of morbidity and mortality  
139 in COVID-19. Several cytokines and other immunological parameters have been correlated with  
140 COVID-19 severity. Most notably, elevated IL-6, IL-8, IL-10, MCP-1 and IP-10 levels were  
141 detected in hospitalized patients, especially critically ill patients, in several studies, and are  
142 associated with ICU admission, respiratory failure, and poor prognosis<sup>3,30-36</sup>. Alongside this pro-  
143 inflammatory cytokine environment, significant immune cell alterations have been described such  
144 as lymphopenia, T and B cell activation and exhaustion<sup>37</sup>, as well as altered frequencies of  
145 myeloid cells, including conventional dendritic cells (cDCs) and plasmacytoid dendritic cells  
146 (pDCs)<sup>5,38,39</sup>.

147 Given the emerging evidence of enteric involvement by SARS-CoV-2, immune  
148 dysregulation in COVID-19 and the propensity of the GI immune system to suppress  
149 inflammation, we aimed to define the role of the GI tract in the pathogenesis of COVID-19. Here,  
150 we present findings on four well-characterized cohorts of COVID-19 patients hospitalized in  
151 tertiary care centers in New York City, USA and Milan, Italy, where we conducted high  
152 dimensional analyses of mucosal and systemic immune parameters and investigated disease  
153 outcomes associated with GI involvement in COVID-19 patients.

## 154 **Results**

### 155 **Clinical characteristics of discovery cohort**

156 We initiated a large, multi-cohort study to determine the role of the GI tract in the pathogenesis of  
157 SARS-CoV-2 infection. Our initial, 'discovery cohort' comprised 925 patients who tested PCR  
158 positive for SARS-COV-2 at the Mount Sinai Hospital (MSH) in New York City between April 1,  
159 2020 and April 15, 2020. Among these 925 patients, 634 cases met our inclusion criteria of  
160 hospital admission, age > 18 years and having a multiplexed cytokine panel performed during  
161 their admission (**Supplementary Fig. 1**). The basic demographics and clinical characteristics are  
162 summarized in **Table 1**. Patients were  $64 \pm 16$  years old (range 23-99 years) with 369 (58%) of  
163 the patients being male. The cohort comprised 28% Hispanic, 25% African American, 22% White  
164 and the remainder Asian or other based on patient's self-reported ethnicity. Comorbid illnesses  
165 included obesity (37%), hypertension (HTN) (36%) and diabetes mellitus (DM) (22%), similar to  
166 prior reports<sup>40</sup>. Fifty-four (9%) patients had mild disease, 361 (57%) moderate, 158 (25%) severe  
167 and 61 (10%) had severe COVID-19 with end organ damage (EOD) (**Table 2**, disease severity  
168 defined in Methods and **Supplementary Table 1**). During hospitalization, 110 patients were  
169 admitted to the ICU (17%) and 151 patients (24%) died by the end of data collection (6/15/2020)  
170 (**Table 2**).

171 We analyzed diarrhea, nausea and vomiting at the time of hospital admission. Two  
172 hundred and ninety-nine patients (47%) reported any GI symptoms (nausea, vomiting and/or  
173 diarrhea) with diarrhea being the most common (245 patients, 39%), followed by nausea (157  
174 patients, 25%), and then vomiting (82 patients, 13%) (**Table 3**). Patients with GI symptoms were  
175 significantly younger (average age 61 years) than those without GI symptoms (average age 67  
176 years) ( $p < 0.0001$ ) (**Table 1**). The distribution of race, ethnicity and co-morbid illnesses including  
177 obesity, HTN, DM and inflammatory bowel diseases (IBD) were comparable between those with  
178 GI symptoms and those without GI symptoms (**Table 1**).

179

### 180 **COVID-19 severity was significantly reduced in patients with GI symptoms when compared** 181 **to those without GI symptoms**

182 In an effort to determine the association between GI symptoms and COVID-19 severity, we initially  
183 performed univariate analysis comparing the distribution of COVID-19 severities in patients with  
184 and without GI symptoms. Patients presenting with GI symptoms had less severe disease than  
185 patients without GI symptoms ( $p < 0.001$  Chi-square test). Importantly, mortality was significantly  
186 lower in COVID-19 patients with GI symptoms (15.7%) than those without GI symptoms (31.0%;  
187  $p < 0.0001$  Fisher's exact test) (**Table 2, Fig. 1a**). Furthermore, each individual GI symptom

188 (nausea, vomiting and diarrhea) was associated with less severe disease ( $p < 0.02$  Fisher's exact  
189 test) and lower mortality ( $p < 0.001$  Fisher's exact test) (**Fig. 1a**). These findings were further  
190 emphasized by Kaplan-Meier estimates of survival over short-term follow-up of 25 days ( $p < 0.001$   
191 log-rank test) (**Fig. 1b, Supplementary Fig. 2a**). Consistent with prior reports<sup>35,40,41</sup> older age and  
192 higher disease severity were associated with higher mortality in the discovery cohort (**Table 4**),  
193 providing validity to our findings.

194 Next, we decided to account for multiple comorbidities in determining the impact of GI  
195 symptoms on COVID-19 outcomes. Herein, we adjusted for age, body mass index (BMI), gender,  
196 race, diabetes, HTN, chronic lung disease and heart disease in a multivariate model to determine  
197 the impact of any GI symptoms and each of the individual GI symptoms (nausea, vomiting or  
198 diarrhea) on disease outcomes. In the multivariable models, any GI symptoms, diarrhea, nausea,  
199 and vomiting, were inversely associated with disease severity and mortality, while age and BMI  
200 were positively associated with these outcomes. African-American race was inversely associated  
201 with disease severity but not mortality (**Fig. 1c, Supplementary Fig. 2b, Supplementary Table**  
202 **2**). Patients who presented with GI symptoms had 50% reduced odds of having severe disease  
203 (odds ratio of 0.56) and death from COVID-19 (odds ratio 0.54), compared to the patients who  
204 presented without GI symptoms (**Fig. 1d, Supplementary Table 2**).

205

### 206 **An external validation cohort further confirms decreased mortality in COVID-19 patients** 207 **with GI symptoms**

208 Next, we sought an external validation cohort, distinct from the MSH discovery cohort, and studied  
209 well-characterized patients ( $n=287$ ) from Milan, Italy, to determine the impact of GI symptoms on  
210 COVID-19 associated outcomes. In this cohort, GI symptoms on admission were characterized  
211 as presence ( $n=80$ , 27.9%) or absence of diarrhea on admission (**Table 5**). Consistent with the  
212 discovery cohort, patients with diarrhea on admission were significantly younger ( $60.6 \pm 13.9$  vs  
213  $65.5 \pm 13.3$  for patients without diarrhea,  $p = 0.0056$ ) and had significantly lower mortality (10.0%  
214 in patients with diarrhea vs 23.7% in patients without diarrhea,  $p=0.008$ ). Additionally, patients  
215 with diarrhea had lower composite outcome of mortality or ICU admission compared to those  
216 without diarrhea (20% vs 40%,  $p=0.0014$ ) (**Table 5**). Distinct from the discovery cohort, the  
217 proportion of male patients was lower in those patients with diarrhea (57.5%) compared to those  
218 without diarrhea on admission (72%) ( $p=0.0238$ ) (**Table 5**). Next, the association between  
219 diarrhea and mortality was evaluated by multivariate logistic regression adjusting for age, gender,  
220 BMI, diabetes, chronic heart and lung disease and other confounders. Even after adjusting for  
221 these covariates, the presence of diarrhea on admission was found to be significantly inversely



222 associated with mortality with a median odds ratio of 0.33 over 1000 bootstrap iterations (**Fig.**  
223 **1e**).

### 224 **Presence of GI symptoms can be used to predict reduced disease severity and mortality** 225 **in patients with COVID-19 in a second validation cohort**

226 After observing significantly reduced mortality in COVID-19 patients with GI symptoms in our  
227 discovery and external validation cohort, we developed a predictive model based on the discovery  
228 cohort and applied it to a distinct internal validation cohort comprising of 242 well-characterized  
229 patients with COVID-19, admitted between April 16, 2020 and April 30, 2020 to MSH. The  
230 inclusion of 'any GI symptoms' to a model consisting of age and BMI at baseline, improved the  
231 ability to predict severity and mortality with a median area under the curve (AUC) of 0.59 (age +  
232 BMI) vs. 0.64 (age + BMI + any GI symptoms) for disease severity and 0.70 (age + BMI) vs. 0.73  
233 (age + BMI + any GI symptoms) for mortality (**Fig. 1f, Supplementary Table 3**). In addition, the  
234 effect of GI symptoms, age and BMI on the AUC was evaluated by excluding each variable one  
235 at a time from the model and calculating the consequent reduction in AUC. The exclusion of GI  
236 symptoms resulted in a significant reduction in AUC with a median value of 0.054 for disease  
237 severity and 0.03 for mortality. Notably, the effect of GI symptoms on the AUC was more dramatic  
238 than that of age (AUC reduction of 0.054 versus 0.025) for disease severity (**Fig. 1f,**  
239 **Supplementary Table 3**).

### 240 241 **COVID-19 patients with GI symptoms have reduced levels of circulating cytokines** 242 **associated with inflammation and tissue damage.**

243 To gain mechanistic insights into significantly reduced COVID-19 severity and mortality across  
244 these three large cohorts, we began by analyzing systemic biomarkers, comparing patients with  
245 and without GI symptoms admitted to MSH (discovery and internal validation cohorts). Initially,  
246 we examined, a set of 4 cytokines, IL-6, IL-8, TNF- $\alpha$ , and IL-1 $\beta$ , measured on admission in all the  
247 patients as part of routine clinical care. IL-6, and IL-8 levels, known to be associated with poor  
248 survival<sup>35</sup> were found to be significantly reduced in circulation of patients with GI symptoms (FDR  
249 10%) (**Supplementary Fig. 3, Supplementary Table 4**).

250 Next, to facilitate high dimensional analyses of potential immunological differences  
251 between patients with and without GI symptoms, we performed a validated, multiplexed proteomic  
252 assay (O-link), simultaneously quantifying 92 protein analytes in 238 patients (from among the  
253 discovery and internal validation cohorts; GI symptoms (n=104), no GI symptoms (n=134)) where  
254 serum samples were available for analyses. Unsupervised consensus clustering of these 92  
255 analytes revealed six groups of analytes with similar expression patterns across all COVID-19

256 patients (**Fig. 2a, Supplementary Table 5**). Notably, analytes in clusters 5 and 6 displayed less  
257 correlation in patients with GI symptoms compared to those without GI symptoms (**Fig. 2a,**  
258 **Supplementary Fig. 4**). Next, we interrogated biological pathways over-represented in each  
259 cluster of soluble analytes. We found that the “KEGG Jak/Stat Signaling Pathway” was  
260 significantly enriched in Cluster 5; while the “Hallmark Inflammatory Response” pathway was  
261 significantly enriched in Cluster 4 (Fisher’s exact test 10% FDR). These pathways were  
262 downregulated in patients displaying diarrhea symptoms based on pathway level signatures  
263 ( $p < 0.05$  from t-test) (**Fig. 2b**); suggesting a reduced inflammatory response in patients affected  
264 by GI symptoms. In addition, we found that clusters 1, 2, 3, 5 and 6 were significantly  
265 downregulated in patients with GI symptoms compared to those without (FDR 15%) (**Fig. 2c**).  
266 This downregulation seemed to be driven mostly by diarrhea since the same clusters 1, 2, 3, 5  
267 and 6 were significantly downregulated with FDR correction at 10% in patients who presented  
268 with diarrhea compared to those without symptoms. The lack of signal registered for nausea and  
269 vomiting might be due to reduced statistical power given by the smaller number of samples  
270 displaying vomiting ( $n=29$ ) or nausea ( $n=54$ ) symptoms.

271 When looking at each of the 92 analytes individually, key inflammatory cytokines and  
272 chemokines were significantly downregulated (IL-8, TGF- $\alpha$ , IL-17C, IL-15RA, IL-10RB, MMP10,  
273 TNFRSF9, OPG, IL-6, LIF, GDNF, IL-17A, ARTN and CCL28). On the other hand, TNF-Related  
274 Apoptosis Inducing Ligand (TRAIL), a cytokine with immune regulatory properties<sup>42,43</sup> and IL-7, a  
275 cytokine associated with T cell development<sup>44</sup> were significantly upregulated in patients with GI  
276 symptoms compared to those without (t-test FDR 10%) (**Fig. 2d,e, Supplementary Table 6**).  
277 When looking at each individual GI symptom, diarrhea had the most significantly differential  
278 analytes. As a caveat, this difference between diarrhea, nausea and vomiting might be due to  
279 reduced statistical power given that fewer patients presented with nausea and vomiting than those  
280 who presented with diarrhea. Consistent with GI symptoms as a group, IL-7 was significantly  
281 increased, in addition, MCP-2 was significantly increased in patients presenting with diarrhea.

282 We also quantified total anti-spike protein IgA, IgG and IgM antibodies and compared  
283 patients with and without GI symptoms and patients with and without diarrhea. There were no  
284 significant differences between the groups (**Supplementary Fig. 5**)

285 Thus, overall, GI symptoms are associated with significantly reduced levels of key  
286 inflammatory cytokines like IL-6, IL-8, IL-17 and CCL28 that are known to be associated with poor  
287 COVID-19 outcomes.

288

289 **The GI tract was endoscopically uninfamed in all patients**



290 Next, we sought to obtain GI tissue-level mechanistic insights regarding disease pathogenesis.  
291 To this end, we enrolled 18 cases with COVID-19 and 10 SARS-CoV-2 uninfected controls who  
292 underwent upper GI endoscopy (SARS-CoV-2 infected n=16, uninfected n=8), colonoscopy  
293 (SARS-CoV-2 infected n=1, uninfected n=1) or both upper endoscopy and colonoscopy (SARS-  
294 CoV-2 infected n=1, uninfected n=1) (**Table 6, Supplementary Table 7**). Patient 10 was initially  
295 suspected to have COVID-19 but was excluded after multiple negative SARS-CoV-2  
296 nasopharyngeal (NP) PCR tests and negative COVID-19 antibody tests. The remaining 17 cases  
297 were classified as asymptomatic / mild / moderate (n=10) or severe (n=7) disease according to  
298 the criteria detailed in **Supplementary Table 1**. While we endeavored to examine patients as  
299 early in disease course as was possible, given the aerosolizing nature of endoscopic procedures  
300 (potentially exposing endoscopic staff to SARS-CoV-2), as well as challenges inherent in  
301 endoscopic biopsies of acutely ill COVID-19 patients, a majority of patients were examined in the  
302 early convalescent phase of COVID-19 disease. Specifically, GI biopsies were performed after  
303  $27.5 \pm 13.8$  days from the onset of COVID-19 symptoms (or first SARS-CoV-2 PCR if  
304 asymptomatic) and  $17.3 \pm 17.5$  days from the last positive NP swab (if patient had a positive NP  
305 swab after the procedure, it was considered to be 0 days from last PCR positive) (**Fig. 3a**).  
306 COVID-19 symptoms on presentation and treatment regimens were diverse as detailed in  
307 **Supplementary Table 8**. Sample allocation for different assays is detailed in **Supplementary**  
308 **Fig. 9**.

309 The GI mucosa was endoscopically uninflamed in all subjects regardless of the severity  
310 of illness, with no evidence of loss of vascularity, edema, friability, erosions or ulcerations (**Fig.**  
311 **3b**), except for one post-intestinal transplant case where inflammation was attributed to transplant  
312 rejection. Histopathological examination revealed a mild increase in intraepithelial lymphocytes  
313 (IELs) in 8 cases and a scant neutrophilic infiltrate in 7 cases (**Fig. 3c, Supplementary Fig. 6,**  
314 **Supplementary Table 9**). Notably, the biopsies were reported as histologically normal in 3 cases  
315 (**Fig. 3d, Supplementary Table 9**). Histopathological details of pre-pandemic (non-COVID-19)  
316 controls are provided in **Supplementary Table 10**.

### 317 318 **Small bowel enterocytes have robust expression of Angiotensin converting enzyme-2** 319 **(ACE2) and harbor SARS-CoV-2 antigens**

320 Early events in the pathogenesis of SARS-CoV-2 infection include attachment of the receptor  
321 binding domain of the viral spike (S) protein to epithelial ACE2<sup>14-17</sup>. Using immunofluorescence  
322 (IF) microscopy, we observed robust and extensive expression of ACE2 on the small intestinal  
323 brush border in both COVID-19 cases and controls (**Fig. 4a-h**). Additionally, we detected SARS-

324 CoV-2 nucleocapsid protein in small intestinal enterocytes of COVID-19 patients (**Fig. 4i,n,**  
325 **Supplementary Fig. 7**), but not controls (**Fig. 4m,r, Supplementary Fig. 8**), indicative of virus  
326 infection in these cells. Remarkably, when present, the distribution of viral antigens was patchy in  
327 the upper small intestines (duodenum; **Fig. 4i-l**), but diffuse in the lower small intestines (ileum;  
328 **Fig. 4n-q**). Positive staining was exclusively seen in the epithelium irrespective of intestinal  
329 location. Overall, of the 11 COVID-19 patients where IF staining was performed, 10 showed viral  
330 antigen on IF microscopy in at least one intestinal segment (duodenum or ileum) (**Supplementary**  
331 **Table 9**). Interestingly, the presence of viral antigens on IF did not correlate with the presence of  
332 histologic abnormalities. As negative controls, 5 duodenal biopsies and 6 ileal biopsies from 10  
333 patients collected prior to the pandemic (**Supplementary Table 10**), showed no evidence of viral  
334 antigens on immunostaining (**Fig. 4m,r, Supplementary Fig. 8**).

335  
336 **Ultrastructural analyses of GI tissues reveal viral particles in small intestinal enterocytes**  
337 Transmission electron microscopy of intestinal biopsy tissues revealed the presence of 70-110  
338 nm viral particles in the enterocytes of the duodenum and ileum (**Fig. 4s-u**). Pleomorphic,  
339 spherical structures, morphologically consistent with viral particles were observed in conjunction  
340 with small vesicles within enterocytes along the basolateral surface of the enterocytes (**Fig. 4s**)  
341 and blebbing off of the enterocyte apex (**Fig. 4u**). Particles with distinct, stalk-like projections  
342 (corona) were seen within the enterocyte cytoplasm (**Fig. 4t**). Overall, of the 13 patient samples  
343 processed for electron microscopy studies, 6 showed viral-like particles on ultrastructural  
344 analyses (**Supplementary Table 9**).

345  
346 **Infectious virions could not be isolated from the GI tissues of COVID-19 patients**  
347 Several attempts were made to assess for the presence of potentially infectious virions in the  
348 intestines of COVID-19 patients. Supernatants of homogenized intestinal tissues were inoculated  
349 on confluent Vero E6 cells and incubated at 37°C for 7 days. Brightfield microscopy showed no  
350 apparent cytopathic effects (CPE). In addition, cell culture supernatants did not reveal the  
351 presence of viral RNA by quantitative RT-PCR (qRT-PCR) and plaque assays. Experiments  
352 showed no plaque formation in Vero E6 cells after staining with 2% crystal violet solution.

353 RT-qPCR was performed in whole biopsy tissue after RNA isolation in both COVID-19+  
354 patients and controls. Results showed that Ct values of COVID-19+ patients were  $\geq 34$ , while RNA  
355 sequencing (RNA-Seq) data detected SARS-CoV-2 reads only in the one ileal sample tested but  
356 in none of the 12 duodenal biopsies. Altogether these data suggest that SARS-CoV-2 was present  
357 at low copy numbers in the GI tract of these early-convalescent COVID-19 cases.

358

### 359 **GI lamina propria pro-inflammatory dendritic cells are depleted in COVID-19 patients**

360 Next, we performed mass cytometry (CyTOF) based immunophenotypic analyses on the GI  
361 tissues of 13 and peripheral blood of 10 COVID-19 cases and 10 controls (**Table 6**,  
362 **Supplementary Table 7, Supplementary Fig. 9**). GI tissues were divided into lamina propria  
363 (LP) and epithelial compartment (EC) fractions and analyzed separately. Immune populations  
364 were clustered on the basis of cell-specific markers for both the LP and EC (**Fig. 5a,c,g**). While  
365 the overall distribution of canonical immune cell subsets in the GI LP were comparable between  
366 COVID-19 and control patients (**Fig. 5a,b**), few immune populations showed differences as  
367 detailed below. Additionally, no clear differences in the LP could be discerned between patients  
368 with asymptomatic/mild/moderate disease and those with severe disease (**Fig. 5b**,  
369 **Supplementary Table 12a**).

370 In the LP, among myeloid cells, CD206<sup>+</sup>CD1c<sup>+</sup> “inflammatory” cDC2 (conventional DCs)<sup>45</sup>  
371 were reduced in COVID-19 cases compared to controls (0.4-fold decrease, p=0.01). Additionally,  
372 plasmacytoid DCs (pDCs) were reduced in COVID-19 cases (0.5 fold decrease, p=0.07) (**Fig.**  
373 **5d,e**), analogous to changes described in the peripheral blood of COVID-19 patients<sup>36</sup>. Among  
374 other LP populations, effector (PD-1<sup>+</sup>CD38<sup>+</sup>) CD4<sup>+</sup> and CD8<sup>+</sup> T cells were significantly increased  
375 in COVID-19 cases compared to the controls (**Fig. 5f**), while CD8<sup>+</sup>CD103<sup>+</sup> T cells (tissue resident  
376 memory subset) trended higher in COVID-19 cases compared to controls (1.7-fold increase,  
377 p=0.06) (**Supplementary Fig. 10a**). Neutrophils (3-fold), eosinophils (1.9-fold), CD4<sup>-</sup>CD8<sup>-</sup>T cells  
378 (3.5-fold) and CD4<sup>+</sup>CD103<sup>+</sup> T cells (1.8-fold) were increased in COVID-19 cases, but these  
379 differences were not statistically significant possibly due to the sample size. We also observed a  
380 trend of non-significantly decreased regulatory CD4<sup>+</sup> T (T<sub>REG</sub>) cells (0.6-fold decrease) and  
381 increased IgM<sup>+</sup> plasma cells (2.3-fold increase) in the LP of infected cases vs controls  
382 (**Supplementary Fig. 10a**). The distribution of naïve and memory CD4<sup>+</sup> and CD8<sup>+</sup> T cells was  
383 altered in COVID-19 patients, with a reduction of naïve CD4<sup>+</sup> T cells and EMRA (effector memory  
384 re-expressing RA) CD8<sup>+</sup> T cells in LP of COVID-19 patients (**Supplementary Fig. 10b**), but this  
385 difference did not reach statistical significance.

386 Similar to the LP, the EC showed a reduction of CD206<sup>+</sup> cDC2 in COVID-19 cases  
387 compared to controls (0.4-fold decrease, p=0.05), while the CD4<sup>-</sup>CD8<sup>-</sup> subset of IELs was  
388 significantly increased (1.6-fold-increase, p=0.03) (**Fig. 5h**). CD8<sup>+</sup> T cells, the dominant IEL  
389 population, showed an increase (2.6-fold) in COVID-19 cases compared to controls but the  
390 difference did not reach statistical significance (p=0.4) (**Supplementary Table 12a**), likely owing  
391 to inter-patient variability, also observed by light microscopy. A subset of CD8<sup>+</sup> IELs, CD8<sup>+</sup>CD69<sup>+</sup>

392 T cells, showed a non-significant increase in COVID-19 cases vs controls (3.9-fold,  $p=0.2$ ), while  
393 plasma cells were comparable between the cases and controls (**Supplementary Fig. 11 a,b,c**).

394 In the peripheral blood, cell type assignments were carried out using specific cell surface  
395 markers (**Supplementary Fig. 12a**). We observed that effector ( $PD-1^+CD38^+$ ) T cells (for both  
396  $CD4^+$  and  $CD8^+$  T lymphocytes) were significantly increased in PBMCs of SARS-CoV-2 infected  
397 individuals (**Fig. 5i**).  $CD14^-CD16^+$  inflammatory monocytes trended lower in COVID-19 cases  
398 compared to controls (0.4-fold decrease,  $p=0.09$ ). In contrast,  $CD14^+CD16^-$  “classical” monocytes  
399 were comparable in COVID-19 cases and controls ( $p=0.3$ ) (**Supplementary Fig. 12b**).  
400 Additionally, a non-significant increase in  $IgG^+$  plasma cells (7.2-fold,  $p=0.13$ ) and a non-  
401 significant decrease in  $T_{REG}$  (0.8-fold,  $p=0.2$ ) were observed in COVID-19 cases (**Supplementary**  
402 **Fig. 12c,d, Supplementary Table 12b**). Finally, a significant increase in activated ( $CD29^+CD38^+$ )  
403  $CD4^+$  T cells was noted in the peripheral blood of COVID-19 cases compared to controls  
404 (**Supplementary Fig. 13a**) and a non-significant increase of these activated T cells in the LP of  
405 COVID-19 patients (**Supplementary Fig. 13b**). Details of all immune population changes in the  
406 GI LP, GI EC and in circulation are provided in **Supplementary Table 12a and 12b**.

407 Altogether, similar to published data from the peripheral blood of COVID-19 patients<sup>36</sup>,  
408 intestinal tissues from COVID-19 cases showed reduced pro-inflammatory DCs and pDCs but  
409 increased effector T cells compared to controls.

410

#### 411 **GI LP pro-inflammatory pathways are downregulated in COVID-19 patients**

412 To further probe the molecular response of the GI tract following SARS-CoV-2 infection, we  
413 performed RNA-Seq on EC and LP cellular fractions separately in 13 COVID-19 patients and 8  
414 controls. Samples derived from the EC and LP clustered separately on the basis of their top  
415 transcriptional signatures, demonstrating distinctness of the two compartments within the GI tract  
416 (**Supplementary Fig. 14, Supplementary Data**). Accordingly, comparisons between COVID-19  
417 cases and controls were performed separately for each tissue, and 1063 differentially expressed  
418 genes (DEG) were identified out of total 11419 genes detected (**Fig. 6a, Supplementary Data**).  
419 The majority of DEGs were detected in the LP (1061, false discovery rate [FDR]  $\leq 0.05$ ), compared  
420 to 12 DEGs in the EC that largely overlapped with the LP (**Fig. 6a**). Both LP and EC showed  
421 upregulation of genes involved in immunomodulation, including the anti-microbial peptide *LCN2*,  
422 and the metallothioneins *MT1E*, *MT1F*, *MT1H*, *MT1M*, *MT1X*, *MT2A* and *TMEM107*. In addition,  
423 heat shock proteins, *HSPA1A* and *HSPA1B*, were downregulated in both tissues. Pathway  
424 enrichment analysis of DEGs ranked by significance revealed several KEGG pathways that were  
425 depleted in COVID-19 patients compared to controls (**Fig. 6b**). Downregulation of pathways linked

426 to T<sub>H</sub>17 cell differentiation and inflammatory bowel diseases (IBD) was characterized by the  
427 depletion of *RORA*, *IL4R*, *IFNG*, *IL18R1*, *IL1B*, *STAT4* and *HLA-DRA*. Pathways linked to antigen  
428 processing, T<sub>H</sub>1 and T<sub>H</sub>2 cell differentiation, and MAPK signaling were significantly downregulated  
429 in the LP from COVID-19 patients. In contrast, genes associated with metabolic functions,  
430 including amino acid metabolism (*NOS2*, *SMS*, *ALDH2*, *GOT2*), mineral absorption (*MT1G*,  
431 *MT2A*, *MT1E*), as well as mucin biosynthesis (*GALNT7*, *GALNT3*, *GALNT8*) were significantly  
432 upregulated in COVID-19 patients compared to controls (**Fig. 6b**).

433 We considered the possibility that the observed expression changes could imply  
434 alterations in relative cell type proportions (in addition to transcriptional alterations within cells).  
435 Therefore, we interrogated GI data derived from single-cell RNA-seq<sup>46</sup> for enrichment of cell type-  
436 specific gene expression signatures. Consistent with CyTOF data (**Fig. 5** and **Supplementary**  
437 **Table 12a and 12b**), genes associated with DCs and eosinophils were reduced in COVID-19  
438 patients compared to controls (**Fig. 6c**). Additionally, signatures related to the size of endothelial  
439 cell and mast cell pools were reduced, while genes linked to goblet cells, proliferating epithelial  
440 cells, enteroendocrine cells and epithelial stem cells were increased, possibly reflecting the  
441 sequelae of intestinal epithelial infection by SARS-CoV-2 and subsequent recovery (**Fig. 6c**).

442 Given the unexpected reduction in DC numbers in the GI tissues, we probed myeloid gene  
443 signatures further, and found significant downregulation of genes associated with pDC (*DAPK1*,  
444 *IRF7*, *ICAM1* and *GM2A*), activated DCs (*TNFAIP2*, *CD86*, *CD83*), cDC1 (*RELB*, *IRF8* and *HLA-*  
445 *DRA*) and cDC2 (*CLEC7A* and *CLEC10A*). Of note, we also found that LP genes associated with  
446 inflammatory DCs (monocyte-derived DCs, MoDCs) (*TGFB1*, *TGFB1*, *STAB1*, *SDCBP*,  
447 *RNASET2*, *MSR1*, *MRC1*, *MERTK*, *DNASE1L3*, *CD163L1*, *C5AR1*, *SPI1*, *CSF1R*, *AOAH*, *ABCA*)  
448 were significantly reduced (**Fig. 6d**), which was consistent with the reduced number of  
449 inflammatory DCs observed by CyTOF.

450 Finally, we looked at the average EC and LP expression of recently reported gene  
451 signatures linked to the antiviral response against SARS-CoV-2 from post-mortem lung tissue  
452 samples<sup>30</sup>, and human intestinal organoids<sup>29</sup>. Although we did not observe a substantial acute  
453 SARS-CoV-2 response, there was significant upregulation of *LCN2* in both EC and LP, and *OAS*  
454 and *GBP3* in the LP only. Notably, we did observe a trend towards induction of antiviral response  
455 genes in the EC, where expression of canonical antiviral genes such as *IFI44L*, *IFIT1*, *IFITM3*,  
456 *IFI44*, *IFI6* and *OAS3* was increased (**Fig. 6e**).

457 Next, using gene set enrichment analysis (GSEA), we rank ordered the EC DEGs  
458 according to effect size (logFC \* -logPvalue) and tested for enrichment in the reported SARS-  
459 CoV-2 infected gene signatures<sup>29</sup> (**Supplementary Fig. 15a**). The genes upregulated in EC



460 showed a significant enrichment in genes upregulated in the SARS-CoV-2 infected intestinal  
461 organoid gene datasets. We then carried out Hallmark pathway enrichment analyses on this  
462 ranked EC gene list and found that the top two processes associated with genes upregulated in  
463 EC were interferon alpha response (normalized enrichment score (NES) 1.91, FDR<0.005) and  
464 interferon gamma response (NES=1.8, FDR=0.005) (**Supplementary Fig. 15b**). This enrichment  
465 is indicative of the host antiviral response against SARS-CoV-2 in human intestines of COVID-19  
466 patients.

467 We then evaluated cytokines and chemokines in intestinal samples projecting our RNA-  
468 seq dataset with published data from the human bronchial epithelial cells infected with SARS-  
469 CoV-2<sup>30</sup>. Remarkably, we found that the many of the inflammatory cytokines and chemokines  
470 such as IL-1 $\beta$ , IFN $\gamma$ , CCL24 and CXCL8 were downregulated in COVID-19 patients (**Fig. 6e**). The  
471 only chemokine showing significant increase was CCL15 which is reported to have structural  
472 properties of antimicrobial peptides and has a role in maintaining intestinal homeostasis<sup>47</sup> (**Fig.**  
473 **6e**). Significantly, we also noted that the key inflammatory genes including *IFNG*, *IL1B*, *CXCR4*,  
474 *TNFSF14*, *CXCL2*, *CSF-1*, *CXCL8*, *IL18R1*, *NRP1* and *IL18BP* were downregulated in intestinal  
475 LP of COVID-19 cases compared to the uninfected controls (**Fig. 6f**).

476 Together, these data reveal a dynamic remodeling of GI tissues by SARS-CoV-2, notable  
477 in the LP for a significant downregulation of pathways associated with inflammation and antigen  
478 presentation, yet activation of viral response signaling genes in the EC.

479

## 480 Discussion

481 At the outset, given the robust expression of ACE2 on the small intestinal epithelium<sup>48</sup>, at  
482 levels that are arguably among the highest in the body<sup>49</sup>, we hypothesized that the GI tract would  
483 be susceptible to SARS-CoV-2 infection. In testing our hypothesis, herein, we report on the first  
484 human study to demonstrate infection of intestinal enterocytes *in vivo*, define the cellular and  
485 transcriptomic responses of GI tissue in COVID-19 patients and associate them with clinical  
486 outcomes in multiple, large cohorts of COVID-19 patients. An unexpected, but significant  
487 reduction in disease severity and mortality in patients with GI symptoms identifies a new aspect  
488 of disease pathogenesis and provides evidence of an 'organ-specific' program of host response  
489 to SARS-CoV-2, which in this case is associated with a survival advantage.

490 GI manifestations, reported in nearly half of patients within our discovery cohort were  
491 notably higher than some of the early reports<sup>3,7</sup> but similar to more recent studies<sup>8</sup>, likely  
492 attributable to greater clinical awareness of GI symptoms and therefore more documentation of  
493 such symptoms. A recently published study of 278 patients from a Columbia University Hospital



494 in New York City reported that among COVID-19 patients with GI symptoms (diarrhea, nausea  
495 and vomiting), there was a non-significant trend towards lower rates of intensive care unit (ICU)  
496 admission and a significantly lower rate of death during short-term follow-up<sup>50</sup>. Similar  
497 observations arise from the study of ‘Multisystem Inflammatory Syndrome Children’ (MIS-C).  
498 Some of these children have diarrhea as a predominant symptom<sup>51,52</sup>, systemic evidence of GI  
499 involvement<sup>9,53,54</sup>, and a unique responsiveness to anti-inflammatory treatments, including IL-6,  
500 intravenous immunoglobulin (IVIG) and anti-IL1<sup>55-58</sup>, which lead to the resolution of inflammatory  
501 pathology in these children. Intestinal involvement in COVID-19 resulting in mortality benefit  
502 stands in contrast to the involvement of all other organs including the pulmonary<sup>59,60</sup>, renal<sup>61,62</sup>  
503 and vascular<sup>63</sup> compartments.

504 The fact that GI symptoms remain significantly associated with better COVID-19 outcomes  
505 after adjusting for multiple covariates, known to be associated with reduced survival, in 3  
506 independent cohorts totaling 1163 patients, across two different countries enhances the  
507 robustness and validity of our findings. Furthermore, our model to predict COVID-19 severity and  
508 mortality was enhanced by the inclusion of GI symptoms suggesting that intestinal parameters  
509 should be considered in initial assessments and severity stratification of COVID-19 patients.

510 Several, non-mutually exclusive hypotheses may explain the lower mortality in COVID-19  
511 patients with GI symptoms. Possibilities include “diversion” of the virus away from the lung, an  
512 organ where infection proves lethal in a subset of patients. Another possibility includes virus  
513 intrinsic factors, associated with differences in tissue-tropism and perhaps virulence. Yet another  
514 intriguing possibility is that GI infection stimulates an anti-inflammatory, ‘tolerogenic’ immune  
515 response locally as well as systemically. Detailed examination of soluble, cellular and  
516 transcriptomic factors associated with GI infection provided some support for this argument.

517 For example, independent of disease severity and unlike inflammatory changes seen in  
518 the pulmonary mucosa<sup>64</sup>, inflammatory infiltrates were scarce in the LP of COVID-19 patients. A  
519 patchy and mild increase in IELs was observed within the EC. Additionally, we observed a rather  
520 significant lack of cDC2, ‘inflammatory’ DCs, pDCs in the intestinal LP. These findings mirror  
521 observations from the SARS epidemic of 2003<sup>19</sup> as well as current autopsy data demonstrating a  
522 lack of intestinal inflammation despite the presence of viral antigens in both these tissues<sup>65</sup>. We  
523 propose that, in spite of their infectability, the intestines mount a limited and short-lasting  
524 inflammatory response to SARS-CoV-2.

525 On examination of circulating proteins, including analyses of cytokines and chemokines  
526 known to be associated with COVID-19 severity<sup>30,31,35</sup>, we found that multiple  
527 cytokines/chemokines were downregulated in patients with GI symptoms compared to patients

528 without. These included the proinflammatory cytokines IL-6 and IL-8, which are now considered  
529 a hallmark of increased severity and mortality in COVID-19 as well as a number of other  
530 cytokines/chemokines involved in tissue inflammation. The lower IL-17 expression we observed  
531 systemically is in line with the reduced T<sub>H</sub>17 RNA seq expression signatures we found in biopsy  
532 samples from COVID-19 patients. IL-17 is secreted by T<sub>H</sub>17 and innate cells and is crucial for the  
533 recruitment of neutrophils promoting inflammation in a variety of tissues, including the intestinal  
534 mucosa<sup>66,67</sup>. Additionally, IL-17 has been shown to have pathogenic effects both in SARS-CoV-  
535 2<sup>68</sup> as well as during SARS-CoV<sup>69</sup> and MERS<sup>70</sup> infections. Interestingly, IL-17C (specifically found  
536 to be decreased in patients with GI symptoms in our study) is produced primarily by epithelial  
537 cells rather than hematopoietic cells<sup>71</sup>. Our finding of COVID-19 patients with GI symptoms having  
538 reduced CCL28, a cytokine expressed by mucosal epithelial cells and involved in eosinophil  
539 chemotaxis<sup>72</sup>, is consistent with prior work showing increased eosinophils to be associated with  
540 severe COVID-19 disease<sup>31</sup> and our RNA-seq data showing decreased eosinophil associated  
541 genes. IL-15 promotes neutrophilic cytoplasmic re-arrangements and phagocytosis<sup>73</sup>, DCs  
542 differentiation<sup>74</sup>, and T cell stimulation<sup>75</sup>. The reduced systemic expression of the IL-15 receptor  
543 is in line with our intestinal findings showing lower frequencies of DCs in COVID-19 patients. IL-  
544 10 is generally considered an immune modulatory and anti-inflammatory cytokine, however an  
545 excess of IL-10 can inhibit the function of immune cells such as NK and CD8<sup>+</sup> T cells, possibly  
546 delaying clearance of viruses<sup>76</sup>. Our results of increased systemic expression of IL-10 receptor in  
547 patients presenting without GI symptoms is in line with previous studies showing IL-10 to be  
548 elevated in COVID-19 patients, associated with disease severity and inversely correlated with  
549 CD8<sup>+</sup> T cells<sup>77,78</sup>.

550 In contrast, the only two cytokines found to be upregulated in patients presenting with GI  
551 symptoms were IL-7 and TRAIL, both with important immunoregulatory functions. IL-7, produced  
552 by stromal cells and intestinal epithelial cells, has been considered as a therapeutic agent in  
553 COVID-19 related to its effects on T cell differentiation and survival<sup>79</sup>. Similarly, TRAIL is  
554 associated with immunosuppressive, immunoregulatory and anti-inflammatory functions<sup>42,43</sup> as  
555 well as some evidence of viral infection control in the intestinal tract<sup>80</sup>.

556 Transcriptome analyses further demonstrated the downregulation of a number of  
557 important pro-inflammatory gene products, including *IFNG*, *IL1B*, *IKBKB* and *STAT3B*, which  
558 contribute to T<sub>H</sub>17 cell differentiation and IBD pathogenesis. Calprotectin, a heterodimer  
559 encompassing calgranulin A and calgranulin B, which are encoded by *S100A8* and *S100A9*,  
560 respectively, was recently identified as a biomarker of severe COVID-19 disease and suggested  
561 to represent a trigger of cytokine release syndrome<sup>81</sup>. We observed no induction of *S100A8* or

562 *S100A9* in intestinal tissues, even in patients with severe COVID-19, suggesting that the vast  
563 intestinal surface did not contribute to the production of calprotectin in COVID-19 patients. Pro-  
564 inflammatory cytokines and chemokines that are elevated in the lungs of COVID-19 patients<sup>64,82</sup>  
565 were surprisingly downregulated (*IL1B, CXCL8, CXCL2, CXCR6*) or unchanged (*CCL3, CXCL10,*  
566 *CCR1, CXCR3*) in the intestines, compared to non-COVID controls. Other relevant gene products  
567 associated with severe COVID-19<sup>64,83,84</sup> were either significantly lower in the intestinal LP  
568 (*CXCL8, IL1B, IFNG, HIF1A, HLA-DQA1*) or trended lower (*CCL2, CCL4, CCL4L2, CTSB, IL23A*)  
569 or were comparable to non-COVID controls (*HMGB1, CCL3, CCL8, HMOX1*). Tissue-residence  
570 markers such as *ITGA1, CXCR6, JAML*, which are reported to be increased in the pulmonary  
571 mucosa of severe COVID-19 patients<sup>64</sup>, were significantly downregulated in the GI tract. Finally,  
572 aside from detecting decreased expression of pro-inflammatory gene products, we found  
573 increased expression of anti-inflammatory gene products, including transcripts involved in the  
574 biogenesis of the gut-specific MUC2 mucin, a mucus-forming glycoprotein released by goblet  
575 cells that contributes to gut tolerance<sup>85</sup>.

576 Thus, by dissecting circulating proteomic and GI tissue transcriptomic response, we noted  
577 a cytokine milieu characterized by either a suppression of or a failure of induction of an  
578 inflammatory response to the virus. Additionally, we observed a lack of production of secondary  
579 mediators including calprotectin, which would feed into the inflammatory cascade and culminate  
580 in the “cytokine storm” typical of severe COVID-19. Our detailed cellular analyses confirm a lack  
581 of inflammatory monocytes and macrophages and a depletion of inflammatory DCs in the GI tract.  
582 This failure of induction of inflammatory pathways, regardless of the clinical severity of disease,  
583 stands in stark contrast to the massive immunopathology, noted systemically, and within the  
584 pulmonary mucosa of severe COVID-19 patients<sup>60</sup> as well as patients with active IBD<sup>86,87</sup>.

585 The mechanisms underpinning the lack of inflammation in the COVID-19-infected intestine  
586 are unclear, but could be linked to the notorious tolerogenic bias of both effector and regulatory  
587 cells from both innate and adaptive branches of the mucosal immune system<sup>88</sup>. In addition, the  
588 SARS-CoV-2 virus could specifically inhibit immune activating and/or stimulate immune  
589 suppressive pathways in the intestinal mucosa directly or indirectly through ACE2 or other  
590 receptors. We also recognize that our analyses of the GI tract were not performed during the most  
591 acute phase of the illness in some patients. However, even in the patients that were sampled  
592 within the first 15 days of the onset of symptoms or positive nasal swab (patients 1, 6 and 18),  
593 the “pro-inflammatory changes” were not observed in the intestines. A separate study by our  
594 group that analyzed stool samples from patients going through the acute phase of COVID-19,  
595 found little evidence of an active gut inflammatory response. In particular, such stool samples

596 strikingly lacked any significant increase of IL-1 $\beta$ , IL-6, TNF- $\alpha$  and IL-10, despite the detection of  
597 viral genomes (MEDRXIV/2020/183947).

598 In summary, we have observed an unexpected but significant reduction in COVID-19  
599 severity and mortality when patients demonstrate GI symptoms like diarrhea, nausea or vomiting.  
600 These data suggest a previously unappreciated tissue-specific response to SARS-CoV-2 and  
601 provide the rationale for more studies aimed at determining the mechanisms underpinning the  
602 attenuation of SARS-CoV-2 pathogenicity by the intestinal environment. Such efforts may lead to  
603 the development of novel treatments against COVID-19 and potentially other similar deadly  
604 infections in the future.

605

## 606 **Methods**

### 607 **Clinical cohorts**

#### 608 *1. Discovery cohort*

609 Patients admitted to Mount Sinai Hospital (MSH) between April 1, 2020 and April 15, 2020 were  
610 recruited into the Discovery Cohort if they were SARS-CoV-2 PCR positive, more than 18 years  
611 of age and if the “ELLA panel of cytokines” (IL-6, IL-8, IL-1 $\beta$  and TNF- $\alpha$ ) was performed as part  
612 of clinical care. Clinical details from eligible patients were extracted from Mount Sinai Data  
613 Warehouse (MSDW) under an IRB approved protocol (IRB-20-03297A North American registry  
614 of the digestive manifestations of COVID-19)

615 A total of 634 subjects were included in the discovery cohort (**Supplementary Figure 1**).  
616 In addition to demographic information (including race and ethnicity and primary language),  
617 clinical characteristics, laboratory data and outcomes data was extracted from the medical charts.  
618 Co-variables that were studied included: history of smoking, BMI (obesity defined as BMI >30) and  
619 comorbid conditions including, hypertension, diabetes, chronic lung disease (including asthma  
620 and COPD), heart disease (including coronary artery disease, atrial fibrillation and heart failure),  
621 chronic kidney disease, cancer, HIV, and inflammatory bowel disease (IBD).

622 COVID severity was defined based on internal scoring system developed by the  
623 Department of Infectious Diseases at Mount Sinai Hospital with the following definitions: Mild -  
624 SpO<sub>2</sub>>94% on room air AND no pneumonia on imaging, Moderate - SpO<sub>2</sub><94% on room air OR  
625 pneumonia on imaging, Severe - high flow nasal cannula (HFNC), non-rebreather mask (NRBM),  
626 Bilevel Positive Airway Pressure (non-invasive positive airway ventilation), or Mechanical  
627 ventilation AND no pressor medications AND creatinine clearance > 30 AND ALT < 5x upper limit  
628 of normal, Severe with evidence of end organ damage (EOD) - high flow nasal canula (HFNC),  
629 non-rebreather mask (NRBM), Bilevel Positive Airway Pressure (non-invasive positive airway

630 ventilation), or Mechanical ventilation AND pressor medications OR creatinine clearance <30 OR  
631 new renal replacement therapy OR ALT > 5x upper limit of normal.

632 GI symptoms were defined as more than one episode of either diarrhea, nausea, and/or  
633 vomiting at the time of admission. If only one episode of either diarrhea, nausea, and/or vomiting  
634 was specifically documented, patients were not considered to have GI symptoms. Additionally,  
635 we did not consider GI symptoms that developed during the course of hospitalization, as they  
636 could reflect nosocomial or treatment-related effects.

637 Disease severity (as described above) and mortality were considered as outcomes  
638 variables. Mortality was calculated as patient status (dead or alive) at 25 days post admission. If  
639 no information was available after discharge, patients were censored at the time of hospital  
640 discharge.

#### 641 *2. External Validation Cohort*

642 To confirm the Discovery Cohort findings, we analyzed a cohort of patients admitted to a tertiary  
643 care center in Milan, Italy between February 22, 2020 and March 30, 2020. A total of 287 patients  
644 with a confirmed positive SARS-CoV-2 PCR and who did not die or were not transferred to the  
645 ICU within 24 hours from admission were studied. Presence of vomiting and diarrhea (defined  
646 as at least three loose bowel movement per day) on or prior to admission was recorded. Outcomes  
647 were analyzed using ICU admission, death or the composite study end-point of ICU admission or  
648 death within 20 days of hospitalization.

#### 649 *3. Internal Validation Cohort*

650 To test a predictive model of COVID-19 severity and disease-related mortality, we developed a  
651 distinct 'Internal Validation Cohort' of patients who were hospitalized at MSH between April 16,  
652 2020 and April 30, 2020 and satisfied the same inclusion and exclusion criteria as in the discovery  
653 cohort. Additionally, patients already included in the discovery cohort were excluded. From a total  
654 of 408 patients, 242 met inclusion criteria and were thus included in the Internal Validation Cohort.  
655 Demographic, clinical and outcomes related data was extracted from patients' medical records  
656 as described for the Discovery Cohort.

#### 657 *4. Intestinal Biopsy Cohort*

658 To gain mechanistic insights into GI tissue response in COVID-19 patients, intestinal biopsies and  
659 peripheral blood from 18 COVID-19 and 10 control patients were obtained between April 17, 2020  
660 and June 2, 2020. Subjects included hospitalized patients as well as those seen in the outpatient  
661 GI practices. COVID-19 cases and controls were defined on the basis of SARS-CoV-2 swab tests.  
662 The demographic characteristics of these patients and controls are provided in **Fig. 3a, Table 6,**

663 and **Supplementary Table 7**. Informed consent was obtained from all patients. The biopsy-  
664 related studies were approved by the Mount Sinai Ethics Committee/IRB (IRB 16-0583, The  
665 impact of viral infections and their treatment on gastrointestinal immune cells).

666

### 667 **SARS-CoV-2 testing**

668 The SARS-CoV-2 PCR was run in the Clinical Microbiology laboratory as part of routine care on  
669 the Roche cobas platform. This platform performs selective amplification of 2 targets ORF-1  
670 (Target 1) and the E-gene for pan-Sarbecovirus (Target 2) (detects SARS-CoV-2 as well as SARS  
671 or MERS viruses, but not routine seasonal Coronavirus). A positive result indicated that either  
672 both Target 1 and Target 2 were detected (majority of cases) or Target 1 alone was detected. A  
673 presumptive positive result indicates a negative Target 1 result and a positive Target 2 result  
674 which according to the manufacture can be a result of the following: "1) a sample at concentrations  
675 near or below the limit of detection of the test, 2) a mutation in the Target 1 target region in the  
676 oligo binding sites, or 3) infection with some other Sarbecovirus (e.g., SARS-CoV or some other  
677 Sarbecovirus previously unknown to infect humans), or 4) other factors." Patients with a  
678 presumptive positive SARS-CoV-2 PCR were included in the analysis if they were treated  
679 clinically as having COVID-19.

680

### 681 **Computational analyses**

#### 682 *Descriptive statistics*

683 Basic demographics and clinical characteristics of the cohort were defined by descriptive  
684 statistics. For univariable analyses graph pad prism (version 8) was used to perform statistical  
685 analyses and to produce figures. For age, an unpaired t-test was performed. For categorical  
686 variables, the Fisher's exact test or the Chi-square test was used as appropriate.

#### 687 *Multivariate model based on discovery cohort*

688 For this analysis, we considered 570 patients with clinical descriptors including as age, gender,  
689 race, BMI, comorbidities and GI symptoms. A multivariate logistic regression was utilized to model  
690 severity and mortality as function of each of the GI symptoms and clinical variables including race,  
691 age, gender, BMI, heart and lung diseases and hypertension. In particular, race was stratified as  
692 White (Caucasian), Black (African-American), Hispanic and others; lung disease was set equal to  
693 1 if the patient was either affected by COPD or asthma and zero otherwise; heart disease was  
694 set equal to 1 if the patient was either affected by coronary artery disease, atrial fibrillation or heart  
695 failure and 0 otherwise. The severity indicator was set equal to 1 for severe and severe with EOD  
696 patients and 0 for Mild and Moderate COVID patients; mortality was set equal to 1 for deceased



697 patients and 0 otherwise. Significant association based on 95% confidence interval (CI) are  
698 reported in **Fig. 1c** and **Supplementary Table. 2**. CI of odds ratio were computed based on 1000  
699 bootstrap iterations. At each bootstrap iteration, patients were sampled with replacements and  
700 logistic regressions were estimated considering as outcome severity and mortality. Then, 95% CI  
701 of coefficients and odds ratio were estimated across bootstrap iterations (**Fig. 1d**).

#### 702 *External Validation Cohort*

703 For this analysis, we considered 228 patients with clinical data such as age, gender and GI  
704 symptoms. A multivariate logistic regression was utilized to model mortality, ICU admission and  
705 the composite outcome of ICU admission or mortality as function of presence or absence of  
706 diarrhea and clinical variables including age, gender, BMI, heart disease, COPD, diabetes and  
707 hypertension. Heart disease was set equal to 1 if the patient was either affected by coronary artery  
708 disease or atrial fibrillation and 0 otherwise. Confidence intervals of odds ratio were computed  
709 based on 1000 bootstrap iterations. At each bootstrap iteration, patients were sampled with  
710 replacements and logistic regressions were estimated considering the outcome as mortality, ICU  
711 admission or the composite outcome of ICU admission or death. Then, 95% confidence intervals  
712 of odds ratio were estimated across bootstrap iterations (**Fig. 1e**).

713

#### 714 *Predictive performance based on the Internal Validation Cohort*

715 For this analysis, we considered 233 patients with clinical data including age, BMI, and GI  
716 symptoms. In order to evaluate the predictive performance of each model, bootstrapping was  
717 performed. Specifically, at each bootstrap iteration, we randomly sampled patients in the  
718 discovery cohort with replacement and estimated a logistic regression to model each outcome as  
719 function of a particular GI symptom, age and BMI. In this analysis, only age and BMI were adjusted  
720 for since they were the only variables significantly associated with both outcomes across different  
721 GI symptoms models in the discovery cohort (**Fig. 1c**). Then, the estimated model was utilized to  
722 predict the outcome of patients in the validation cohort. This procedure was repeated for 1000  
723 bootstrap iterations. For each iteration, Receiving Operating Characteristic (ROC) curve and area  
724 under the curve (AUC) were computed. For comparison purposes, the distribution of AUC across  
725 1000 bootstrap iterations from the predictive model based on age and BMI only was considered.  
726 **Fig. 1f** (left panel) shows the boxplot of AUC values across 1000 bootstrap iterations. Then,  
727 considering the following model

728 
$$\text{outcome} = f(\text{age} + \text{bmi} + \text{any GI symptom}) \quad [\text{Model 1}]$$

729 we evaluated the effect of each variable on the outcome by computing the reduction in AUC  
730 obtained after removing one variable at a time. For this purpose, the AUC of model [Model 1] was  
731 compared to the following three models

732 outcome = f(age + bmi) [Model 2]

733 outcome = f(age + any GI symptom) [Model 3]

734 outcome = f(bmi + any GI symptom) [Model 4]

735 for 1000 bootstrap iterations. Following the strategy above, at each bootstrap iteration, patients  
736 were sampled with replacement. **Fig. 1f** (right panel) shows the 95% confidence intervals of  
737 difference in AUC between [Model 1] and [Model 2], [Model 3] and [Model 4] (i.e.,  $AUC_{Model1} -$   
738  $AUC_{Model2}$ ,  $AUC_{Model1} - AUC_{Model3}$ ,  $AUC_{Model1} - AUC_{Model4}$ ) across 1000 bootstrap  
739 iterations. The difference in AUC was computed considering both mortality and severity as the  
740 outcome.

741

#### 742 **ELLA Cytokine panel**

743 The ELLA platform is a method for rapid cytokine measurement using microfluidics ELISA assays.  
744 The assay measured TNF- $\alpha$ , IL-6, IL-8, and IL-1 $\beta$ , previously validated by the Mount Sinai Human  
745 Immune Monitoring Center (HIMC) using plasma from multiple myeloma patients and recently  
746 reported for large cohort of COVID-19 patients admitted to Mount Sinai Hospital<sup>35</sup>.

747

#### 748 **Multiplexed proteomic assay (Olink)**

749 For analysis of circulating cytokines, we used a multiplexed proteomic inflammation panel  
750 (Olink), which consists of 92 inflammation-related proteins quantified by an antibody-mediated  
751 proximity extension-based assay<sup>89</sup>. Samples with normalized protein expression values below  
752 the limit-of-detection in >75% of samples were excluded from further analysis. For the  
753 remainder of analytes, any sample under the limit of detection was assigned a value of the limit-  
754 of-detection divided by the square root of 2. The log<sub>2</sub> fold-change over the median healthy  
755 control protein expression was then calculated, and the Benjamini-Hochberg<sup>90</sup> procedure was  
756 used to adjust P values for multiple testing

757

#### 758 **Consensus Clustering of Olink Data**

759 For this analysis, we considered 238 samples with GI symptoms annotation. Consensus  
760 clustering was performed based on the abundance of 92 cytokines across all 238 samples.  
761 Consensus clustering was performed using the R packages ConsensusClusterPlus<sup>91</sup> based on  
762 z-score normalized data. Specifically, markers were partitioned into six clusters using the Kaplan

763 Meier (KM) algorithm, which was repeated 1000 times. Then, markers in each cluster were  
764 considered in order to derive cluster z-score signatures via package GSVA<sup>92</sup>. Based on these  
765 signatures, the association between different clusters and GI symptoms were derived via logistic  
766 regression with outcome corresponding to each GI symptom. **Fig. 2c** shows the signed FDR (-  
767 log<sub>10</sub> scale). P-values were adjusted via Benjamini-Hochberg<sup>90</sup>.

768

#### 769 **Defining associations between GI symptoms and Olink protein markers**

770 Associations between GI symptoms and Olink proteomic data were derived using unpaired t-test  
771 comparing the symptomatic and asymptomatic groups. P-values were adjusted via Benjamini-  
772 Hochberg<sup>90</sup>. Only associations passing a 10% FDR were reported as significant (**Fig. 2d**).

773

#### 774 **Defining associations between GI symptoms and ELLA cytokine markers**

775 Unpaired t-test were used to compare individual cytokines quantified by the ELLA panel between  
776 GI symptomatic and asymptomatic groups. P-values were adjusted via Benjamini-Hochberg<sup>90</sup>.

777

#### 778 **Biopsy collection and processing for Mass cytometry (CyTOF)**

779 Endoscopic biopsies were obtained from COVID-19 patients and non-COVID-19 controls during  
780 clinically indicated endoscopic procedures. The biopsies were processed in biosafety level 3  
781 (BSL-3) facility within 2 hours of collection.

782 Briefly, biopsies were transferred to 10 ml of 'dissociation buffer' (1M HEPES(Lonza), 5uM  
783 EDTA(Invitrogen), 10% FBS in HBSS buffer (Gibco). The tubes were kept in a shaker (180 rpm,  
784 37°C) for 20 min and then gently vortexed for 10 seconds. Cell suspensions were collected after  
785 passing the biopsies through 100um cell strainers. A second round of EDTA dissociation was  
786 performed as detailed above. The cell suspension was centrifuged at 1800 rpm for 10 min to pellet  
787 the epithelial fraction and kept on ice. The 'non-epithelial fraction' of the tissue was transferred to  
788 fresh tubes containing a 'digestion buffer' (2% FBS, 0.005g Collagenase type IV per sample  
789 (Sigma), 100 ul DNase-I(Sigma) in 10ml in RPMI). Tubes were placed in the shaker (180 rpm,  
790 37°C) for 40 min and thereafter gently vortexed for 30 sec. The digested tissues were filtered  
791 through 100 um cell strainers followed by a second round of filtration through 40um cell strainers.  
792 Cell suspensions were centrifuged at 1800 rpm for 10 min to obtain lamina propria mononuclear  
793 cells. Both epithelial cell (EC) and lamina propria (LP) pellets were then resuspended into 500ul  
794 of RPMI (Gibco) containing 10% FBS+ 1µlRh103 +1µl IdU and incubated at 37°C for 20 min. 5  
795 ml RPMI (+10%FBS) was added to each tube and spun at 1800 rpm to pellet cells. 700µl of Prot1  
796 stabilizer (SmartTube Inc.) was added to each tube and transferred to cryovials and incubated at

797 room temperature for 10 min. Cryovials were immediately transferred to -80 until the sample was  
798 acquired for mass cytometry as detailed below.

799

### 800 **Blood collection and processing for CyTOF**

801 Phlebotomy was performed on COVID-19 patients and non-COVID-19 controls at the time of  
802 endoscopic evaluation. All the blood samples from COVID-19 patients were processed in  
803 enhanced BSL2 conditions per institutional guidelines. Briefly, 15ml of Lymphosep® -  
804 Lymphocyte Separation Medium (MP Bio.) was added to each 50 ml centrifugation tube. Blood  
805 was diluted with PBS to bring the volume up to 30ml and diluted blood was layered gently over  
806 Lymphosep®. Tubes were then centrifuged at 2000 rpm for 20 mins with the brakes and  
807 acceleration off. After centrifugation, with a 3ml transfer pipet, the buffy coat containing PBMCs  
808 was transferred to another 15ml Falcon tube and was centrifuged at 1800 rpm for 10 mins. Pellets  
809 were resuspended in PBS and tubes were centrifuged at 1800 rpm for 10 mins. PBMC pellets  
810 were resuspended in the freezing medium (10% DMSO + 44% FBS in RPMI) and cryopreserved  
811 at -80 °C.

812

### 813 **CyTOF processing and data acquisition**

814 Cells were processed and as previously described<sup>93</sup> according to the manufacturer's instructions.  
815 Briefly, EC and LP SmartTube proteomic stabilized samples were thawed in a 10°C water bath  
816 and washed with Cell Staining Buffer (Fluidigm). To facilitate data acquisition and doublet  
817 removal, multiple samples were also barcoded using Fluidigm Pd barcoding kits and then washed  
818 and pooled for data acquisition. Immediately prior to data acquisition, samples were washed with  
819 Cell Staining Buffer and Cell Acquisition Solution (Fluidigm) and resuspended at a concentration  
820 of 1 million cells per ml in Cell Acquisition Solution containing a 1:20 dilution of EQ Normalization  
821 beads (Fluidigm). The samples were then acquired on a Helios Mass Cytometer equipped with a  
822 wide-bore sample injector at an event rate of <400 events per second. After acquisition, repeat  
823 acquisitions of the same sample concatenated and normalized using the Fluidigm software, and  
824 barcoded samples were de-multiplexed using the Zunder single cell debarcoder.

825

### 826 **CyTOF Data analysis**

827 De-barcoded files were uploaded to Cytobank for analyses. Immune cells were identified based  
828 on Ir-193 DNA intensity and CD45 expression; Ce140+ normalization beads, CD45-low/Ir-193-  
829 low debris and cross-sample and Gaussian ion-cloud multiplets were excluded from subsequent  
830 downstream analysis. Major immune cell types were identified using automated Astrolabe

831 approach, the result of which largely correlated well with our manual gating approaches. The  
832 impact of each tested condition on relative staining quality was evaluated in two ways: 1) overall  
833 correlations were determined by calculating the Pearson's correlation coefficients for the median  
834 expression of each marker across each defined immune subset; and 2) a staining index was  
835 calculated using defined populations showing the highest and lowest expression levels of each  
836 marker:  $SI = (\text{Median}_{\text{pos}} - \text{Median}_{\text{neg}}) / 2 \times \text{Std.Dev}_{\text{neg}}$ . It is already shown that SmartTube-  
837 based fixation protocols take into account previously described mass cytometry artifacts such as  
838 cell-cell multiplets, isotopic spillover or oxidation, or mass cytometer instrument configuration<sup>93</sup>.

839

#### 840 **Statistical Analysis for CyTOF**

841 Pre-gated viable CD45+ cells were first clustered and annotated using the Astrolabe Cytometry  
842 Platform (Astrolabe Diagnostics, Inc.), which involves using a hierarchy-based FlowSOM  
843 algorithm for labeling cell populations in individual samples. These Astrolabe Profiling clusters  
844 from each tissue type were then meta-clustered across all samples utilizing Clustergrammer2's  
845 interactive heatmap as a method to interrogate antibody expression across every cluster and  
846 curate and assign cell population categories. Single sample clusters were also visualized using  
847 UMAP. Pairwise comparisons were performed on the frequencies of each identified cell  
848 population between the patient cohorts (COVID-19 vs. control, COVID-19 severe vs. control,  
849 COVID19-moderate vs. control) to determine fold change, p-values and FDR adjusted p-values  
850 using the Benjamini-Hochberg<sup>90</sup> method to account for multiple comparisons.

851

#### 852 **Cell Culture Experiments/ RNA isolation/ qPCR/Virus Isolation**

853 African green monkey kidney epithelial cells (Vero E6) were originally purchased from American  
854 Type Culture Collection (ATCC). Cells were maintained in Dulbecco's modified Eagle's medium  
855 (DMEM) w/ L-glutamate, sodium pyruvate (Corning) supplemented with 10% fetal bovine serum  
856 (FBS), 100 U penicillin per ml, and 100 mg streptomycin per ml. For all experiments, the cells  
857 were always maintained in monolayers.

858 Several attempts were made to isolate live infectious particles from these biopsies. Briefly,  
859 biopsies were collected and stored in PBS until homogenization. Following homogenization and  
860 centrifugation (10,000 × g, 20 min, 4°C), the resulting supernatant tissue supernatant was  
861 inoculated onto Vero E6 monolayer maintained in optimal virus growth media for SARS-CoV-2  
862 virus (DMEM w/ L-Glutamate, Sodium Pyruvate, 2% FBS, 100 U Penicillin/ml, and 100 mg  
863 Streptomycin/ml, 10 mM Non-Essential Amino Acids, 1 mM Sodium Pyruvate and 10 mM

864 HEPES). Vero E6 cells were incubated at 37 °C, 5% CO<sub>2</sub> for a week and monitored daily for  
865 potential cytopathic effect (CPE).

866 Cell culture supernatants were also collected and assessed for presence of infective  
867 particles by plaque assay. Briefly, ten-fold serial dilutions were performed in infection media for  
868 SARS-CoV-2 and inoculated onto confluent Vero E6 cell monolayer in 6-well plate. After one-hour  
869 adsorption, supernatants were removed, and cells monolayers were overlaid with minimum  
870 essential media (MEM) containing 2% FBS and purified agar (OXOID) at a final concentration of  
871 0.7%. Cells were then incubated 3 days at 37°C. Cells were fixed overnight with 10%  
872 formaldehyde for inactivation of potential SARS CoV2 virus. Overlay was removed and cells were  
873 washed once with PBS. A 2% crystal violet solution was used for plaque visualization and count.  
874 Experiments were performed under BSL3 conditions.

### 875 876 **Specimen Processing for Nucleic Acid Extraction**

877 Whole biopsy tissues from COVID-19 patients and non COVID controls were directly  
878 homogenized in Trizol (Invitrogen) and used to detect the presence of viral RNA. In parallel, RNA  
879 isolated from epithelial compartment and lamina propria fractions from biopsies post-processing  
880 were used for transcriptomics analyses. Total RNA was extracted using Direct-zol RNA Miniprep  
881 Plus (Zymo) kit according to the manufacturer's instructions.

### 882 883 **RT-qPCR for Viral Determination**

884 RNA was retro-transcribed using the enzyme Maxima First Strand cDNA (Thermofisher), and  
885 PCR reaction was performed using the TaqMan™ Universal PCR Master Mix (Thermofisher). For  
886 detection of SARS-CoV-2 RNA, we used the following primers and probe targeting the N gene:

887 N1- SARS-CoV2-F5'GACCCCAAATCAGCGAAAT;

888 N1-SARS-CoV2-R5'TCTGGTTACTGCCAGTTGAATCTG;

889 N1-SARS-CoV2-P FAM5' ACCCCGCATTACGTTTGGTGGACC-BHQ-1

890 (<https://www.cdc.gov/coronavirus/2019-ncov/lab/rt-pcr-panel-primer-probes.html>)

891 Another set of primers was included to detect host 18s and GADPH. Limit of detection and  
892 amplification efficiency were calculated before GI tissue quantification for N1 (173%; R<sup>2</sup>>0.94)  
893 primers using plasmids expressing the NP protein (2019-nCoV\_N\_Positive Control, IDT, cat.  
894 10006625). RNA from GI tissue were run in triplicate in 384 plates using the following cycling  
895 conditions on the Roche LightCycler 480 Instrument II (Roche Molecular Systems, 05015243001):  
896 50 C for 2 min; 95 C for 10 min; 40 cycles of 95C for 15 sec and 60 C for 1 min. Samples below  
897 the limit of detection (Ct≥34 corresponding to 100 genome copies/reaction) were considered



898 negative. Primers and probes for housekeeping genes GAPDH (assay ID Hs02758991\_g1 FAM)  
899 and 18S (assay ID Hs03928990\_g1 FAM) were obtained from ThermoFisher Scientific).

900

### 901 **Cell Culture Experiments/ Virus Isolation**

902 African green monkey kidney epithelial cells (Vero E6) were originally purchased from American  
903 Type Culture Collection (ATCC). Cells were maintained in Dulbecco's modified Eagle's medium  
904 (DMEM) w/ L-glutamate, sodium pyruvate supplemented with 10% fetal bovine serum (FBS), 100  
905 U penicillin per ml, and 100 mg streptomycin per ml. For all experiments, the cells were always  
906 maintained in monolayers.

907 Several attempts were made to isolate live infectious particles from these biopsies. Briefly,  
908 biopsies were collected and stored in PBS until homogenization. Following homogenization and  
909 centrifugation (10,000 × g, 20 min, 4°C), the resulting supernatant tissue supernatant was  
910 inoculated onto Vero E6 monolayer maintained in optimal virus growth media for SARS-CoV-2  
911 virus (DMEM w/ L-Glutamate, Sodium Pyruvate, 2% FBS, 100 U Penicillin/ml, and 100 mg  
912 Streptomycin/ml, 10 mM Non-Essential Amino Acids, 1 mM Sodium Pyruvate and 10 mM  
913 HEPES). Vero E6 cells were incubated at 37 °C, 5% CO<sub>2</sub> for a week and monitored daily for  
914 potential cytopathic effect (CPE).

915 Cell culture supernatants were also collected and assessed for presence of infective  
916 particles by plaque assay. Briefly, ten-fold serial dilutions were performed in infection media for  
917 SARS-CoV-2 and inoculated onto confluent Vero E6 cell monolayer in 6-well plate. After one-hour  
918 adsorption, supernatants were removed, and cells monolayers were overlaid with minimum  
919 essential media (MEM) containing 2% FBS and purified agar (OXOID) at a final concentration of  
920 0.7%. Cells were then incubated 3 days at 37°C. Cells were fixed overnight with 10%  
921 formaldehyde for inactivation of potential SARS CoV2 virus. Overlay was removed and cells were  
922 washed once with PBS. A 2% crystal violet solution was used for plaque visualization and count.  
923 Experiments were performed under BSL3 conditions.

924

### 925 **RNA Sequencing**

926

#### 927 *Library preparation and sequencing*

928 RNA-sequencing (RNA-seq) was performed on tissue biopsies from paired EC and LP samples  
929 from COVID-19 cases and controls. Directional RNA-seq libraries were prepared from 50 ng of  
930 total RNA with the TruSeq® Stranded Total RNA prep with Ribo-Zero kit (cat no. 20020599).

931 Paired-end (100 bp) sequencing was performed for DNA libraries on an Illumina NovaSeq  
932 instrument on a NovaSeq S1 Flowcell, with an average yield of 39 million PE reads/sample.

933

#### 934 *RNA-seq analysis*

935 Base-calling and quality scoring of sequencing data were done through Illumina's Real-Time  
936 Analysis (RTA) software. RNA-seq data processing and reference mapping were done with  
937 custom analysis scripts combining publicly available tools as previously described<sup>94</sup> with  
938 modifications as follows, reads were mapped to a custom reference that combined the human  
939 hg38 reference genome (Release 34, GRCh38.p13) and the SARS-CoV-2 genome (RefSeq  
940 NC\_045512) for simultaneous quantification of host and virus transcripts.

941 Differential gene expression (DGE) analysis was performed with the Bioconductor edgeR  
942 package<sup>95</sup> using as input a combined matrix of mapped paired-end read raw counts, with genes  
943 in rows and samples in columns. Prior to DEG analysis, gene counts were converted to fragments  
944 per kb per million reads (FPKM) with the RSEM package with default settings in strand-specific  
945 mode<sup>96</sup>.

946 Genes with less than 1 FPKM in at least 50% of the samples were removed. The remaining  
947 gene counts were then normalized across samples using the weighted trimmed mean of M-values  
948 (TMM) method<sup>97</sup>. The dispersion was estimated by fitting a generalized linear model (GLM) as  
949 implemented in edgeR, sex was fitted as a covariate on a per-patient paired design. Pairwise  
950 comparisons were performed between sample groups (i.e., between tissue sections, and between  
951 cases and controls). Significant expression differences were selected based on eBayes adjusted  
952 p values corrected for multiple testing using the Benjamini-Hochberg method ( $q \leq 0.05$ ).

953

#### 954 *Gene Ontology and Pathway Enrichment Analysis*

955 KEGG pathway and gene ontology (GO) biological process (BP), molecular function (MF), and/or  
956 cellular component (CC) enrichment analyses were performed using the gProfileR R v0.6.8  
957 package<sup>98</sup>. The background gene set was restricted genes with detected expression (defined as  
958 genes with expression levels above 1 FPKM in at least 50% of samples). Genes with differential  
959 expression were ranked by log 2 fold change and used as an ordered query. P values were  
960 corrected using the g:SCS algorithm to account for multiple comparisons.

961

#### 962 *Cell-type deconvolution and gene signature enrichment analysis*

963 For cell-type deconvolution of the bulk RNA-seq data, gene set enrichment analysis of  
964 differentially expressed genes of cases vs controls comparisons was performed against cell type

965 gene-expression single-cell signatures from intestinal mucosa<sup>46</sup> and dendritic cell (DCs) subsets  
966 gene-expression signatures from ileum<sup>45</sup>. Similarly, differentially expressed genes were tested for  
967 enrichment of gene signatures associated with an antiviral response, inflammation, and cytokine  
968 signaling in acutely infected post-mortem tissue with SARS-CoV-2<sup>30</sup>, were tested for significant  
969 ( $p \leq 0.05$ ) enrichment using Fisher's exact tests and using Bonferroni correction for multiple  
970 comparisons.

971 Additionally, Geneset enrichment analysis (GSEA)<sup>99</sup> was carried out on a rank ordered list  
972 of the infected EC versus control molecular analysis. The ranking metric used was  $\logFC * -\logP$   
973 value, however, the results were similar when  $\logFC$  metric was also used (data not shown). For  
974 the COVID-19 associated datasets we curated two signatures from infected organoids<sup>100</sup>: hSIOs-  
975 COVID-19: human small intestinal organoids (hSIOs) grown in either i) Wnt high expansion (EXP)  
976 medium (at  $\text{adj}P < 0.05$ ) or ii) differentiation (DIF) medium (at  $\text{adj}P < 0.1$ ). The standard GSEA  
977 settings were used, namely 'meandiv' for normalization mode, 'weighted' enrichment statistic, and  
978 '1000' permutations. GSEA using the Hallmark database (v7.1,<sup>101</sup>) was also performed with the  
979 same settings.

980

### 981 **Immunofluorescent (IF) microscopy**

982 Formalin fixed, paraffin embedded tissue acquired during routine clinical care was obtained from  
983 the pathology core at our institution. Sections (5 $\mu$ m) were dewaxed in xylene and rehydrated in  
984 graded alcohol and then phosphate-buffered saline (PBS). Heat-induced epitope retrieval was  
985 performed by incubating slides in a pressure cooker for 15 minutes on high in target retrieval  
986 solution (Dako, S1699). Slides were then left to cool in the solution at room temperature for 30  
987 minutes. Slides were washed twice in PBS and then permeabilized for 30 minutes in 0.1% tritonX-  
988 100 in PBS. Non-specific binding was blocked with 10% goat serum for 1 hour at room  
989 temperature. Sections were then incubated in primary antibodies diluted in blocking solution  
990 overnight at 4°C. Primary and secondary antibodies are summarized in **Supplementary Table**  
991 **11**. Slides were washed in PBST (0.1% tween 20, PBS) 3 times and then incubated in secondary  
992 antibody and 4',6-diamidino-2-phenylindole (1 $\mu$ g/mL) for 1 hour at room temperature. Sections  
993 were washed twice in PBST and once in PBS then mounted with Fluoromount-G (Electron  
994 microscopy sciences, 1798425). Controls included, omitting primary antibody (no primary  
995 control), or substituting primary antibodies with non-reactive antibodies of the same isotype  
996 (isotype control). Tissue was visualized and imaged using a Nikon Eclipse Ni microscope and  
997 digital SLR camera (Nikon, DS-Qi2).

998

999 **Electron Microscopy (EM)**

1000 Biopsy specimens for electron microscopy were placed in 3% buffered glutaraldehyde. Following  
1001 post-fixation in 1% osmium tetroxide, tissues were serially dehydrated and embedded in epoxy  
1002 resin in standard fashion. One-micron toluidine-stained scout sections were prepared for light  
1003 microscopic orientation; 80nm ultrathin sections for EM were stained with uranyl acetate and lead  
1004 citrate and examined in a Hitachi 7650 transmission electron microscope at 80kV.

1005

1006 **Acknowledgements**

1007 We would like to thank the clinical staff, physicians and patients who participated in this study.  
1008 This research was partly funded by NIH/NIDDK123749 (SM). Additional support was provided by  
1009 CRIP (Center for Research for Influenza Pathogenesis), a NIAID supported Center of Excellence  
1010 for Influenza Research and Surveillance (CEIRS, contract # HHSN272201400008C), and NIAID  
1011 R01AI113186 (to H.B). Additionally, the work was supported by the generous support of the JPB  
1012 Foundation, the Open Philanthropy Project (research grant 2020-215611 (5384)), the Defense  
1013 Advanced Research Projects Agency, and anonymous donors to AG-S. MT was funded by the  
1014 Digestive Disease Research Foundation (DDRF). A.S.G-R. is supported in part by a Robin  
1015 Chemers Neustein Postdoctoral Fellowship Award. The research carried out by H.V.B and A.S.G-  
1016 R was supported by the Office of Research Infrastructure of the National Institutes of Health (NIH)  
1017 under awards S10OD018522 and S10OD026880. S.T.C. is supported by grant F30CA243210.  
1018 G.J.B. is supported by a Research Fellowship Award from the Crohn's and Colitis Foundation of  
1019 America. M.P.S. is supported by NIH T32 5T32AI007605. S.G. is supported by grants U24  
1020 CA224319, U01 DK124165, and P01 CA190174. We also thank Randy Albrecht for support with  
1021 the BSL3 facility and procedures at the Icahn School of Medicine at Mount Sinai (ISMMS).

1022

1023

1024 **References**

1025

- 1026 1. Zhu, N., *et al.* A Novel Coronavirus from Patients with Pneumonia in China, 2019. *N Engl*  
1027 *J Med* **382**, 727-733 (2020).
- 1028 2. Wang, C., Horby, P.W., Hayden, F.G. & Gao, G.F. A novel coronavirus outbreak of global  
1029 health concern. *Lancet* **395**, 470-473 (2020).
- 1030 3. Huang, C., *et al.* Clinical features of patients infected with 2019 novel coronavirus in  
1031 Wuhan, China. *Lancet* **395**, 497-506 (2020).
- 1032 4. Goyal, P., *et al.* Clinical Characteristics of Covid-19 in New York City. *N Engl J Med* **382**,  
1033 2372-2374 (2020).

- 1034 5. Xu, T., *et al.* Epidemiological and clinical features of asymptomatic patients with SARS-  
1035 CoV-2 infection. *J Med Virol* (2020).
- 1036 6. Coronavirus Disease 2019 (COVID-19): Symptoms of Coronavirus: Centers for Disease  
1037 Control and Prevention, 2020. [https://www.cdc.gov/coronavirus/2019-ncov/symptoms-](https://www.cdc.gov/coronavirus/2019-ncov/symptoms-testing/symptoms.html)  
1038 [testing/symptoms.html](https://www.cdc.gov/coronavirus/2019-ncov/symptoms-testing/symptoms.html). Last updated May 13, 2020.
- 1039 7. Jin, X., *et al.* Epidemiological, clinical and virological characteristics of 74 cases of  
1040 coronavirus-infected disease 2019 (COVID-19) with gastrointestinal symptoms. *Gut* **69**,  
1041 1002-1009 (2020).
- 1042 8. Pan, L., *et al.* Clinical Characteristics of COVID-19 Patients With Digestive Symptoms in  
1043 Hubei, China: A Descriptive, Cross-Sectional, Multicenter Study. *Am J Gastroenterol* **115**,  
1044 766-773 (2020).
- 1045 9. Gupta, A., *et al.* Extrapulmonary manifestations of COVID-19. *Nat Med* **26**, 1017-1032  
1046 (2020).
- 1047 10. Tian, Y., Rong, L., Nian, W. & He, Y. Review article: gastrointestinal features in COVID-19  
1048 and the possibility of faecal transmission. *Aliment Pharmacol Ther* **51**, 843-851 (2020).
- 1049 11. Cheung, K.S., *et al.* Gastrointestinal Manifestations of SARS-CoV-2 Infection and Virus  
1050 Load in Fecal Samples From a Hong Kong Cohort: Systematic Review and Meta-analysis.  
1051 *Gastroenterology* **159**, 81-95 (2020).
- 1052 12. Harmer, D., Gilbert, M., Borman, R. & Clark, K.L. Quantitative mRNA expression profiling  
1053 of ACE 2, a novel homologue of angiotensin converting enzyme. *FEBS Lett* **532**, 107-110  
1054 (2002).
- 1055 13. Suárez-Fariñas, M., *et al.* Intestinal inflammation modulates the expression of ACE2 and  
1056 TMPRSS2 and potentially overlaps with the pathogenesis of SARS-CoV-2 related disease.  
1057 *bioRxiv*, 2020.2005.2021.109124 (2020).
- 1058 14. Young, B.E., *et al.* Epidemiologic Features and Clinical Course of Patients Infected with  
1059 SARS-CoV-2 in Singapore. *JAMA - Journal of the American Medical Association* (2020).
- 1060 15. Xiao, F., *et al.* Evidence for Gastrointestinal Infection of SARS-CoV-2. *Gastroenterology*  
1061 **158**, 1831-1833 e1833 (2020).
- 1062 16. Holshue, M.L., *et al.* First Case of 2019 Novel Coronavirus in the United States. *N Engl J*  
1063 *Med* **382**, 929-936 (2020).
- 1064 17. Wu, Y., *et al.* Prolonged presence of SARS-CoV-2 viral RNA in faecal samples. *Lancet*  
1065 *Gastroenterol Hepatol* **5**, 434-435 (2020).
- 1066 18. Fehr, A.R. & Perlman, S. Coronaviruses: An overview of their replication and  
1067 pathogenesis. (2015).
- 1068 19. Leung, W.K., *et al.* Enteric involvement of severe acute respiratory syndrome-associated  
1069 coronavirus infection. *Gastroenterology* **125**, 1011-1017 (2003).
- 1070 20. Chan, K.H., *et al.* Detection of SARS coronavirus in patients with suspected SARS. *Emerg*  
1071 *Infect Dis* **10**, 294-299 (2004).
- 1072 21. Assiri, A., *et al.* Epidemiological, demographic, and clinical characteristics of 47 cases of  
1073 Middle East respiratory syndrome coronavirus disease from Saudi Arabia: a descriptive  
1074 study. *Lancet Infect Dis* **13**, 752-761 (2013).
- 1075 22. Corman, V.M., *et al.* Detection of 2019 novel coronavirus (2019-nCoV) by real-time RT-  
1076 PCR. *Euro Surveill* **25**(2020).

- 1077 23. Wang, X., *et al.* Aberrant gut microbiota alters host metabolome and impacts renal  
1078 failure in humans and rodents. *Gut* (2020).
- 1079 24. Sultan, S., *et al.* AGA Institute Rapid Review of the GI and Liver Manifestations of COVID-  
1080 19, Meta-Analysis of International Data, and Recommendations for the Consultative  
1081 Management of Patients with COVID-19. *Gastroenterology* (2020).
- 1082 25. Munster, V.J., *et al.* Respiratory disease in rhesus macaques inoculated with SARS-CoV-  
1083 2. *Nature* (2020).
- 1084 26. Bojkova, D., *et al.* Proteomics of SARS-CoV-2-infected host cells reveals therapy targets.  
1085 *Nature* (2020).
- 1086 27. Zang, R., *et al.* TMPRSS2 and TMPRSS4 promote SARS-CoV-2 infection of human small  
1087 intestinal enterocytes. *Sci Immunol* **5**(2020).
- 1088 28. Zhou, J., *et al.* Infection of bat and human intestinal organoids by SARS-CoV-2. *Nat Med*  
1089 (2020).
- 1090 29. Lamers, M.M., *et al.* SARS-CoV-2 productively infects human gut enterocytes. *Science*  
1091 (2020).
- 1092 30. Blanco-Melo, D., *et al.* Imbalanced Host Response to SARS-CoV-2 Drives Development of  
1093 COVID-19. *Cell* **181**, 1036-1045 e1039 (2020).
- 1094 31. Lucas, C., *et al.* Longitudinal analyses reveal immunological misfiring in severe COVID-19.  
1095 *Nature* **584**, 463-469 (2020).
- 1096 32. Xu, X., *et al.* Analysis of inflammatory parameters and disease severity for 88  
1097 hospitalized COVID-19 patients in Wuhan, China. *Int J Med Sci* **17**, 2052-2062 (2020).
- 1098 33. Liu, Z., *et al.* Dynamic Interleukin-6 Level Changes as a Prognostic Indicator in Patients  
1099 With COVID-19. *Front Pharmacol* **11**, 1093 (2020).
- 1100 34. Akbari, H., *et al.* The role of cytokine profile and lymphocyte subsets in the severity of  
1101 coronavirus disease 2019 (COVID-19): A systematic review and meta-analysis. *Life Sci*  
1102 **258**, 118167 (2020).
- 1103 35. Del Valle, D.M., *et al.* An inflammatory cytokine signature helps predict COVID-19  
1104 severity and death. *medRxiv* (2020).
- 1105 36. Laing, A.G., *et al.* A dynamic COVID-19 immune signature includes associations with  
1106 poor prognosis. *Nat Med* (2020).
- 1107 37. Mathew, D., *et al.* Deep immune profiling of COVID-19 patients reveals distinct  
1108 immunotypes with therapeutic implications. *Science* (2020).
- 1109 38. Liu, J., *et al.* Longitudinal characteristics of lymphocyte responses and cytokine profiles  
1110 in the peripheral blood of SARS-CoV-2 infected patients. *EBioMedicine* **55**, 102763  
1111 (2020).
- 1112 39. Arunachalam, P.S., *et al.* Systems biological assessment of immunity to mild versus  
1113 severe COVID-19 infection in humans. *Science* (2020).
- 1114 40. Richardson, S., *et al.* Presenting Characteristics, Comorbidities, and Outcomes Among  
1115 5700 Patients Hospitalized With COVID-19 in the New York City Area. *JAMA* (2020).
- 1116 41. Team, C.C.-R. Severe Outcomes Among Patients with Coronavirus Disease 2019 (COVID-  
1117 19) - United States, February 12-March 16, 2020. *MMWR Morb Mortal Wkly Rep* **69**,  
1118 343-346 (2020).
- 1119 42. Falschlehner, C., Schaefer, U. & Walczak, H. Following TRAIL's path in the immune  
1120 system. *Immunology* **127**, 145-154 (2009).



- 1121 43. Chyuan, I.T., Tsai, H.F., Wu, C.S., Sung, C.C. & Hsu, P.N. TRAIL-Mediated Suppression of T  
1122 Cell Receptor Signaling Inhibits T Cell Activation and Inflammation in Experimental  
1123 Autoimmune Encephalomyelitis. *Front Immunol* **9**, 15 (2018).
- 1124 44. Mackall, C.L., Fry, T.J. & Gress, R.E. Harnessing the biology of IL-7 for therapeutic  
1125 application. *Nat Rev Immunol* **11**, 330-342 (2011).
- 1126 45. Martin, J.C., *et al.* Single-Cell Analysis of Crohn's Disease Lesions Identifies a Pathogenic  
1127 Cellular Module Associated with Resistance to Anti-TNF Therapy. *Cell* **178**, 1493-1508  
1128 e1420 (2019).
- 1129 46. Smillie, C.S., *et al.* Intra- and Inter-cellular Rewiring of the Human Colon during  
1130 Ulcerative Colitis. *Cell* **178**, 714-730 e722 (2019).
- 1131 47. Kotarsky, K., *et al.* A novel role for constitutively expressed epithelial-derived  
1132 chemokines as antibacterial peptides in the intestinal mucosa. *Mucosal Immunol* **3**, 40-  
1133 48 (2010).
- 1134 48. Hamming, I., *et al.* Tissue distribution of ACE2 protein, the functional receptor for SARS  
1135 coronavirus. A first step in understanding SARS pathogenesis. *Journal of Pathology*  
1136 (2004).
- 1137 49. Li, M.Y., Li, L., Zhang, Y. & Wang, X.S. Expression of the SARS-CoV-2 cell receptor gene  
1138 ACE2 in a wide variety of human tissues. *Infect Dis Poverty* **9**, 45 (2020).
- 1139 50. Nobel, Y.R., *et al.* Gastrointestinal Symptoms and Coronavirus Disease 2019: A Case-  
1140 Control Study From the United States. *Gastroenterology* **159**, 373-375 e372 (2020).
- 1141 51. Blumfield, E. & Levin, T.L. COVID-19 in pediatric patients: a case series from the Bronx,  
1142 NY. *Pediatr Radiol* (2020).
- 1143 52. Blumfield, E., Levin, T.L., Kurian, J., Lee, E.Y. & Liszewski, M.C. Imaging Findings in  
1144 Multisystem Inflammatory Syndrome in Children (MIS-C) Associated with COVID. *AJR*  
1145 *Am J Roentgenol* (2020).
- 1146 53. Aghemo, A., *et al.* COVID-19 Digestive System Involvement and Clinical Outcomes in a  
1147 Large Academic Hospital in Milan, Italy. *Clin Gastroenterol Hepatol* (2020).
- 1148 54. Lin, L., *et al.* Gastrointestinal symptoms of 95 cases with SARS-CoV-2 infection. *Gut* **69**,  
1149 997-1001 (2020).
- 1150 55. Mehta, P., *et al.* COVID-19: consider cytokine storm syndromes and  
1151 immunosuppression. *Lancet* **395**, 1033-1034 (2020).
- 1152 56. Cao, W., *et al.* High-Dose Intravenous Immunoglobulin as a Therapeutic Option for  
1153 Deteriorating Patients With Coronavirus Disease 2019. *Open Forum Infect Dis* **7**, ofaa102  
1154 (2020).
- 1155 57. Cavalli, G., *et al.* Interleukin-1 blockade with high-dose anakinra in patients with COVID-  
1156 19, acute respiratory distress syndrome, and hyperinflammation: a retrospective cohort  
1157 study. *Lancet Rheumatol* **2**, e325-e331 (2020).
- 1158 58. Guo, Y.-R., *et al.* The origin, transmission and clinical therapies on coronavirus disease  
1159 2019 (COVID-19) outbreak – an update on the status. *Military Medical Research* (2020).
- 1160 59. Ackermann, M., *et al.* Pulmonary Vascular Endothelialitis, Thrombosis, and Angiogenesis  
1161 in Covid-19. *N Engl J Med* **383**, 120-128 (2020).
- 1162 60. Zhang, H., *et al.* Histopathologic Changes and SARS-CoV-2 Immunostaining in the Lung of  
1163 a Patient With COVID-19. *Ann Intern Med* **172**, 629-632 (2020).

- 1164 61. Cheng, Y., *et al.* Kidney disease is associated with in-hospital death of patients with  
1165 COVID-19. *Kidney Int* **97**, 829-838 (2020).
- 1166 62. Gabarre, P., *et al.* Acute kidney injury in critically ill patients with COVID-19. *Intensive*  
1167 *Care Med* **46**, 1339-1348 (2020).
- 1168 63. Varga, Z., *et al.* Endothelial cell infection and endotheliitis in COVID-19. *Lancet* **395**,  
1169 1417-1418 (2020).
- 1170 64. Liao, M., *et al.* Single-cell landscape of bronchoalveolar immune cells in patients with  
1171 COVID-19. *Nat Med* **26**, 842-844 (2020).
- 1172 65. Bradley, B.T., *et al.* Histopathology and ultrastructural findings of fatal COVID-19  
1173 infections in Washington State: a case series. *Lancet* **396**, 320-332 (2020).
- 1174 66. Gaffen, S.L. Structure and signalling in the IL-17 receptor family. *Nat Rev Immunol* **9**,  
1175 556-567 (2009).
- 1176 67. Miossec, P. & Kolls, J.K. Targeting IL-17 and TH17 cells in chronic inflammation. *Nat Rev*  
1177 *Drug Discov* **11**, 763-776 (2012).
- 1178 68. Wu, D. & Yang, X.O. TH17 responses in cytokine storm of COVID-19: An emerging target  
1179 of JAK2 inhibitor Fedratinib. *J Microbiol Immunol Infect* **53**, 368-370 (2020).
- 1180 69. Josset, L., *et al.* Cell host response to infection with novel human coronavirus EMC  
1181 predicts potential antivirals and important differences with SARS coronavirus. *mBio* **4**,  
1182 e00165-00113 (2013).
- 1183 70. Faure, E., *et al.* Distinct immune response in two MERS-CoV-infected patients: can we go  
1184 from bench to bedside? *PLoS One* **9**, e88716 (2014).
- 1185 71. Ramirez-Carrozzi, V., *et al.* IL-17C regulates the innate immune function of epithelial  
1186 cells in an autocrine manner. *Nat Immunol* **12**, 1159-1166 (2011).
- 1187 72. Pan, J., *et al.* A novel chemokine ligand for CCR10 and CCR3 expressed by epithelial cells  
1188 in mucosal tissues. *J Immunol* **165**, 2943-2949 (2000).
- 1189 73. Girard, D., Paquet, M.E., Paquin, R. & Beaulieu, A.D. Differential effects of interleukin-15  
1190 (IL-15) and IL-2 on human neutrophils: modulation of phagocytosis, cytoskeleton  
1191 rearrangement, gene expression, and apoptosis by IL-15. *Blood* **88**, 3176-3184 (1996).
- 1192 74. Regamey, N., *et al.* Airway epithelial IL-15 transforms monocytes into dendritic cells. *Am*  
1193 *J Respir Cell Mol Biol* **37**, 75-84 (2007).
- 1194 75. Mattei, F., Schiavoni, G., Belardelli, F. & Tough, D.F. IL-15 is expressed by dendritic cells  
1195 in response to type I IFN, double-stranded RNA, or lipopolysaccharide and promotes  
1196 dendritic cell activation. *J Immunol* **167**, 1179-1187 (2001).
- 1197 76. Rojas, J.M., Avia, M., Martin, V. & Sevilla, N. IL-10: A Multifunctional Cytokine in Viral  
1198 Infections. *J Immunol Res* **2017**, 6104054 (2017).
- 1199 77. Han, H., *et al.* Profiling serum cytokines in COVID-19 patients reveals IL-6 and IL-10 are  
1200 disease severity predictors. *Emerg Microbes Infect* **9**, 1123-1130 (2020).
- 1201 78. Diao, B., *et al.* Reduction and Functional Exhaustion of T Cells in Patients With  
1202 Coronavirus Disease 2019 (COVID-19). *Front Immunol* **11**, 827 (2020).
- 1203 79. Laterre, P.F., *et al.* Association of Interleukin 7 Immunotherapy With Lymphocyte Counts  
1204 Among Patients With Severe Coronavirus Disease 2019 (COVID-19). *JAMA Netw Open* **3**,  
1205 e2016485 (2020).
- 1206 80. Strater, J., *et al.* TRAIL and its receptors in the colonic epithelium: a putative role in the  
1207 defense of viral infections. *Gastroenterology* **122**, 659-666 (2002).

- 1208 81. Shi, H., *et al.* Neutrophil calprotectin identifies severe pulmonary disease in COVID-19.  
1209 *medRxiv* (2020).
- 1210 82. Chu, H., *et al.* Comparative replication and immune activation profiles of SARS-CoV-2  
1211 and SARS-CoV in human lungs: an ex vivo study with implications for the pathogenesis  
1212 of COVID-19. *Clin Infect Dis* (2020).
- 1213 83. Bost, P., *et al.* Host-Viral Infection Maps Reveal Signatures of Severe COVID-19 Patients.  
1214 *Cell* **181**, 1475-1488 e1412 (2020).
- 1215 84. Chen, L., *et al.* Elevated serum levels of S100A8/A9 and HMGB1 at hospital admission  
1216 are correlated with inferior clinical outcomes in COVID-19 patients. *Cell Mol Immunol*  
1217 (2020).
- 1218 85. Pelaseyed, T., *et al.* The mucus and mucins of the goblet cells and enterocytes provide  
1219 the first defense line of the gastrointestinal tract and interact with the immune system.  
1220 *Immunol Rev* **260**, 8-20 (2014).
- 1221 86. Strober, W. & Fuss, I.J. Proinflammatory cytokines in the pathogenesis of inflammatory  
1222 bowel diseases. *Gastroenterology* **140**, 1756-1767 (2011).
- 1223 87. Strober, W., Fuss, I.J. & Blumberg, R.S. The immunology of mucosal models of  
1224 inflammation. *Annu Rev Immunol* **20**, 495-549 (2002).
- 1225 88. Chistiakov, D.A., Bobryshev, Y.V., Kozarov, E., Sobenin, I.A. & Orekhov, A.N. Intestinal  
1226 mucosal tolerance and impact of gut microbiota to mucosal tolerance. *Front Microbiol* **5**,  
1227 781 (2014).
- 1228 89. Gruber, C., *et al.* Mapping Systemic Inflammation and Antibody Responses in  
1229 Multisystem Inflammatory Syndrome in Children (MIS-C). *medRxiv* (2020).
- 1230 90. Benjamini, Y. & Hochberg, Y. Controlling the False Discovery Rate: A Practical and  
1231 Powerful Approach to Multiple Testing. *Journal of the Royal Statistical Society. Series B*  
1232 *(Methodological)* **57**, 289-300 (1995).
- 1233 91. Wilkerson, M.D. & Hayes, D.N. ConsensusClusterPlus: a class discovery tool with  
1234 confidence assessments and item tracking. *Bioinformatics* **26**, 1572-1573 (2010).
- 1235 92. Hanzelmann, S., Castelo, R. & Guinney, J. GSEA: gene set variation analysis for  
1236 microarray and RNA-seq data. *BMC Bioinformatics* **14**, 7 (2013).
- 1237 93. Geanon, D., *et al.* A Streamlined CyTOF Workflow To Facilitate Standardized Multi-Site  
1238 Immune Profiling of COVID-19 Patients. *medRxiv* (2020).
- 1239 94. Holmes, G., *et al.* Integrated Transcriptome and Network Analysis Reveals  
1240 Spatiotemporal Dynamics of Calvarial Suturogenesis. *Cell Rep* **32**, 107871 (2020).
- 1241 95. Robinson, M.D., McCarthy, D.J. & Smyth, G.K. edgeR: a Bioconductor package for  
1242 differential expression analysis of digital gene expression data. *Bioinformatics* **26**, 139-  
1243 140 (2010).
- 1244 96. Li, B. & Dewey, C.N. RSEM: accurate transcript quantification from RNA-Seq data with or  
1245 without a reference genome. *BMC Bioinformatics* **12**, 323 (2011).
- 1246 97. Robinson, M.D. & Oshlack, A. A scaling normalization method for differential expression  
1247 analysis of RNA-seq data. *Genome Biol* **11**, R25 (2010).
- 1248 98. Reimand, J., Kull, M., Peterson, H., Hansen, J. & Vilo, J. g:Profiler--a web-based toolset  
1249 for functional profiling of gene lists from large-scale experiments. *Nucleic Acids Res* **35**,  
1250 W193-200 (2007).

- 1251 99. Subramanian, A., *et al.* Gene set enrichment analysis: a knowledge-based approach for  
1252 interpreting genome-wide expression profiles. *Proc Natl Acad Sci U S A* **102**, 15545-  
1253 15550 (2005).
- 1254 100. Lamers, M.M., *et al.* SARS-CoV-2 productively infects human gut enterocytes. *Science*  
1255 **369**, 50-54 (2020).
- 1256 101. Liberzon, A., *et al.* The Molecular Signatures Database (MSigDB) hallmark gene set  
1257 collection. *Cell Syst* **1**, 417-425 (2015).  
1258

1259  
1260  
1261  
1262  
1263  
1264

**Table 1:** Basic demographics and clinical characteristics in patients with and without GI symptoms. Number patients (%). For age, an unpaired t-test was performed. For categorical variables, the Fisher's exact test or the Chi-square test was used as appropriate.

|             | <b>Total<br/>(n=634)</b> | <b>GI symptoms<br/>(n=299)</b> | <b>No GI symptoms<br/>(n=335)</b> | <b>p-value</b>    |
|-------------|--------------------------|--------------------------------|-----------------------------------|-------------------|
| Age (years) | 64.0 ± 15.7              | 60.5 ± 15.0                    | 67.2 ± 15.7                       | <b>&lt;0.0001</b> |
| Male        | 369 ± 58.2               | 168 ± 56.2                     | 201 ± 60.0                        | 0.33              |

**Race/ethnicities**

|                  |            |           |           |      |
|------------------|------------|-----------|-----------|------|
| Hispanic         | 177 ± 27.9 | 85 ± 28.4 | 92 ± 27.5 | 0.13 |
| African-American | 161 ± 25.4 | 66 ± 22.1 | 95 ± 28.4 |      |
| White            | 137 ± 21.6 | 70 ± 23.4 | 67 ± 20.0 |      |
| Asian            | 35 ± 5.5   | 22 ± 7.4  | 13 ± 3.9  |      |
| Other            | 124 ± 19.6 | 56 ± 18.7 | 68 ± 20.3 |      |

**Comorbidities**

|                        |            |            |            |      |
|------------------------|------------|------------|------------|------|
| HTN                    | 229 ± 36.1 | 112 ± 37.5 | 117 ± 34.9 | 0.51 |
| Diabetes               | 141 ± 22.2 | 58 ± 19.4  | 83 ± 24.8  | 0.13 |
| Obesity (BMI>30)*      | 211 ± 37.1 | 108 ± 40.6 | 103 ± 34.1 | 0.12 |
| Chronic lung disease   | 59 ± 9.3   | 34 ± 11.4  | 25 ± 7.5   | 0.10 |
| Heart disease          | 111 ± 17.5 | 48 ± 16.1  | 63 ± 18.8  | 0.40 |
| Chronic kidney disease | 95 ± 15.0  | 41 ± 13.7  | 54 ± 16.1  | 0.44 |
| Cancer                 | 66 ± 10.4  | 27 ± 9.0   | 39 ± 11.6  | 0.30 |
| HIV                    | 11 ± 1.7   | 5 ± 1.7    | 6 ± 1.8    | 0.99 |
| IBD                    | 7 ± 1.1    | 4 ± 1.3    | 3 ± 0.9    | 0.71 |

\*BMI information available on only 568 patients

1265  
1266  
1267  
1268  
1269  
1270  
1271  
1272  
1273  
1274  
1275  
1276  
1277  
1278  
1279  
1280  
1281  
1282  
1283

1284 **Table 2:** Disease severity and clinical outcomes in those with and without GI symptoms. The Fisher's  
1285 exact test or the Chi-square test was used as appropriate.  
1286

| Disease severity | Total<br>(n=634) | GI symptoms<br>(n=299) | No GI symptoms<br>(n=335) | p-value       |
|------------------|------------------|------------------------|---------------------------|---------------|
| Mild             | 54 ± 8.5         | 31 ± 10.4              | 23 ± 6.9                  | <b>0.0004</b> |
| Moderate         | 361 ± 56.9       | 188 ± 62.9             | 173 ± 51.6                |               |
| Severe           | 158 ± 24.9       | 63 ± 21.1              | 95 ± 28.4                 |               |
| Severe with EOD  | 61 ± 9.6         | 17 ± 5.7               | 44 ± 13.1                 |               |

|               |            |           |            |                   |
|---------------|------------|-----------|------------|-------------------|
| ICU admission | 110 ± 17.4 | 45 ± 15.1 | 65 ± 19.4  | 0.17              |
| Mortality     | 151 ± 23.8 | 47 ± 15.7 | 104 ± 31.0 | <b>&lt;0.0001</b> |

1287  
1288  
1289  
1290  
1291  
1292  
1293  
1294  
1295  
1296  
1297  
1298  
1299  
1300  
1301  
1302  
1303  
1304  
1305  
1306  
1307  
1308  
1309  
1310  
1311  
1312  
1313  
1314  
1315  
1316  
1317  
1318  
1319  
1320  
1321  
1322  
1323  
1324  
1325



1326 **Table 3:** Proportion of patients with GI symptoms

1327

| <b>GI symptom</b> | <b>Number patients (%)</b> |
|-------------------|----------------------------|
| Nausea            | 157 ± 24.8                 |
| Vomiting          | 82 ± 12.9                  |
| Diarrhea          | 245 ± 38.6                 |
| Any GI symptom    | 299 ± 47.2                 |

1328

1329

1330

1331

1332

1333

1334

1335

1336

1337

1338

1339

1340

1341

1342

1343

1344

1345

1346

1347

1348

1349

1350

1351

1352

1353

1354

1355

1356

1357

1358

1359

1360

1361

1362

1363

1364

1365

1366

1367

1368

1369

1370

1371 **Table 4:** Basic demographics in survivors and non-survivors. For age, an unpaired t-test was performed.  
1372 For categorical variables, the Fisher's exact test or the Chi-square test was used as appropriate.  
1373

|             | <b>Total<br/>(n=634)</b> | <b>Survivors<br/>(n=483)</b> | <b>Non-survivors<br/>(n=151)</b> | <b>p-value</b>    |
|-------------|--------------------------|------------------------------|----------------------------------|-------------------|
| Age (years) | 64.0 ± 15.7              | 61.3 ± 15.2                  | 72.6 ± 14.1                      | <b>&lt;0.0001</b> |
| Male        | 369 (58.2)               | 287 (59.4)                   | 82 (54.3)                        | 0.30              |

**Disease severity**

|                 |            |            |           |                   |
|-----------------|------------|------------|-----------|-------------------|
| Mild            | 54 ± 8.5   | 48 ± 9.9   | 6 ± 4.0   | <b>&lt;0.0001</b> |
| Moderate        | 361 ± 56.9 | 318 ± 65.8 | 43 ± 28.5 |                   |
| Severe          | 158 ± 24.9 | 95 ± 19.7  | 63 ± 41.7 |                   |
| Severe with EOD | 61 ± 9.6   | 22 ± 4.6   | 39 ± 25.8 |                   |

1374  
1375  
1376  
1377  
1378  
1379  
1380  
1381  
1382  
1383  
1384  
1385  
1386  
1387  
1388  
1389  
1390  
1391  
1392  
1393  
1394  
1395  
1396  
1397  
1398  
1399  
1400  
1401  
1402  
1403  
1404  
1405  
1406  
1407  
1408  
1409  
1410  
1411  
1412

1413 **Table 5:** Age, gender and mortality in an external validation (Italian) cohort stratified by presence or  
1414 absence of diarrhea on admission. For age, an unpaired t-test was performed. For categorical variables,  
1415 the Fisher's exact test or the Chi-square test was used as appropriate.  
1416

|                        | <b>Total<br/>(n=287)</b> | <b>Diarrhea on<br/>admission<br/>(n=80)</b> | <b>No diarrhea on<br/>admission<br/>(n=207)</b> | <b>p-value</b> |
|------------------------|--------------------------|---------------------------------------------|-------------------------------------------------|----------------|
| Age (years)            | 64.2 ± 13.6              | 60.6 ± 13.9                                 | 65.5 ± 13.3                                     | <b>0.0056</b>  |
| Male                   | 195 ± 67.9               | 46 ± 57.5                                   | 149 ± 72.0                                      | <b>0.0238</b>  |
| ICU admission          | 52 ± 18.1                | 9 ± 11.3                                    | 43 ± 20.8                                       | 0.06           |
| Mortality              | 57 ± 19.9                | 8 ± 10.0                                    | 49 ± 23.7                                       | <b>0.008</b>   |
| Death or ICU admission | 99 ± 34.5                | 16 ± 20.0                                   | 83 ± 40.1                                       | <b>0.0014</b>  |

1417  
1418  
1419  
1420  
1421  
1422  
1423  
1424  
1425  
1426  
1427

**Table 6:** Clinical characteristics of patients who underwent endoscopic GI biopsies

| Patient # | Age*  | Sex | Procedure         | Tissue sample location | COVID-19 Antibody | Days from symptom onset (or first SARS-CoV-2 PCR if asymptomatic) to procedure | Days from last positive SARS-CoV-2 PCR to procedure (0 if positive swab after procedure) | COVID severity on admission |
|-----------|-------|-----|-------------------|------------------------|-------------------|--------------------------------------------------------------------------------|------------------------------------------------------------------------------------------|-----------------------------|
| 1         | 60-65 | M   | EGD               | Duodenum               | NA                | 10                                                                             | 10                                                                                       | Severe with EOD             |
| 2         | 5-10  | M   | EGD & colonoscopy | Intestinal Transplant  | Positive          | 23                                                                             | 0                                                                                        | Severe                      |
| 3         | 75-80 | M   | EGD               | Duodenum               | NA                | 25                                                                             | 9                                                                                        | Mild                        |
| 4         | 30-35 | F   | EGD               | Duodenum               | NA                | 44                                                                             | 31                                                                                       | Severe with EOD             |
| 5         | 60-65 | M   | EGD               | Duodenum               | Positive          | 24                                                                             | NA                                                                                       | Moderate                    |
| 6         | 50-55 | M   | EGD               | Duodenum               | Positive          | 11                                                                             | 0                                                                                        | Asymptomatic / mild         |
| 7         | 55-60 | M   | EGD               | Duodenum               | Positive          | 19                                                                             | 19                                                                                       | Asymptomatic / mild         |
| 8         | 65-70 | F   | EGD               | Duodenum               | Positive          | 30                                                                             | 23                                                                                       | Severe                      |
| 9         | 75-80 | M   | EGD               | Duodenum               | Positive          | 24                                                                             | 0                                                                                        | Severe                      |
| 10**      | 80-85 | F   | EGD               | Duodenum               | NA                | NA                                                                             | NA                                                                                       | NA                          |
| 11        | 90-95 | F   | EGD               | Duodenum               | Positive          | 36                                                                             | 0                                                                                        | Severe with EOD             |
| 12        | 50-55 | F   | Colonoscopy       | Ileum                  | NA                | 37                                                                             | 31                                                                                       | Mild                        |
| 13        | 40-45 | M   | EGD               | Duodenum               | Positive          | 18                                                                             | 0                                                                                        | Mild                        |
| 14        | 65-70 | F   | EGD               | Duodenum               | Positive          | 37                                                                             | 32                                                                                       | Severe with EOD             |
| 15        | 30-35 | F   | EGD               | Duodenum               | Positive          | 50                                                                             | 48                                                                                       | Mild                        |
| 16        | 70-75 | F   | EGD               | Duodenum               | Positive          | 25                                                                             | 19                                                                                       | Mild                        |
| 17        | 50-55 | M   | EGD               | Duodenum               | NA                | 52                                                                             | 52                                                                                       | Mild                        |
| 18        | 35-40 | M   | EGD               | Duodenum               | NA                | 3                                                                              | 3                                                                                        | Asymptomatic / mild         |

\* Age is provided as a range to obscure identifying information related to individuals

\*\*Patient 10 was excluded from analysis because SARS-CoV-2 nasopharyngeal PCR testing was repeatedly negative and her COVID-19 antibodies were also negative. Her inclusion initially was based on an atypical pulmonary infiltrate on chest X-ray and a viral syndrome in two of her family members.

**Fig. 1: GI symptoms in COVID-19 patients associated with reduced severity and mortality**

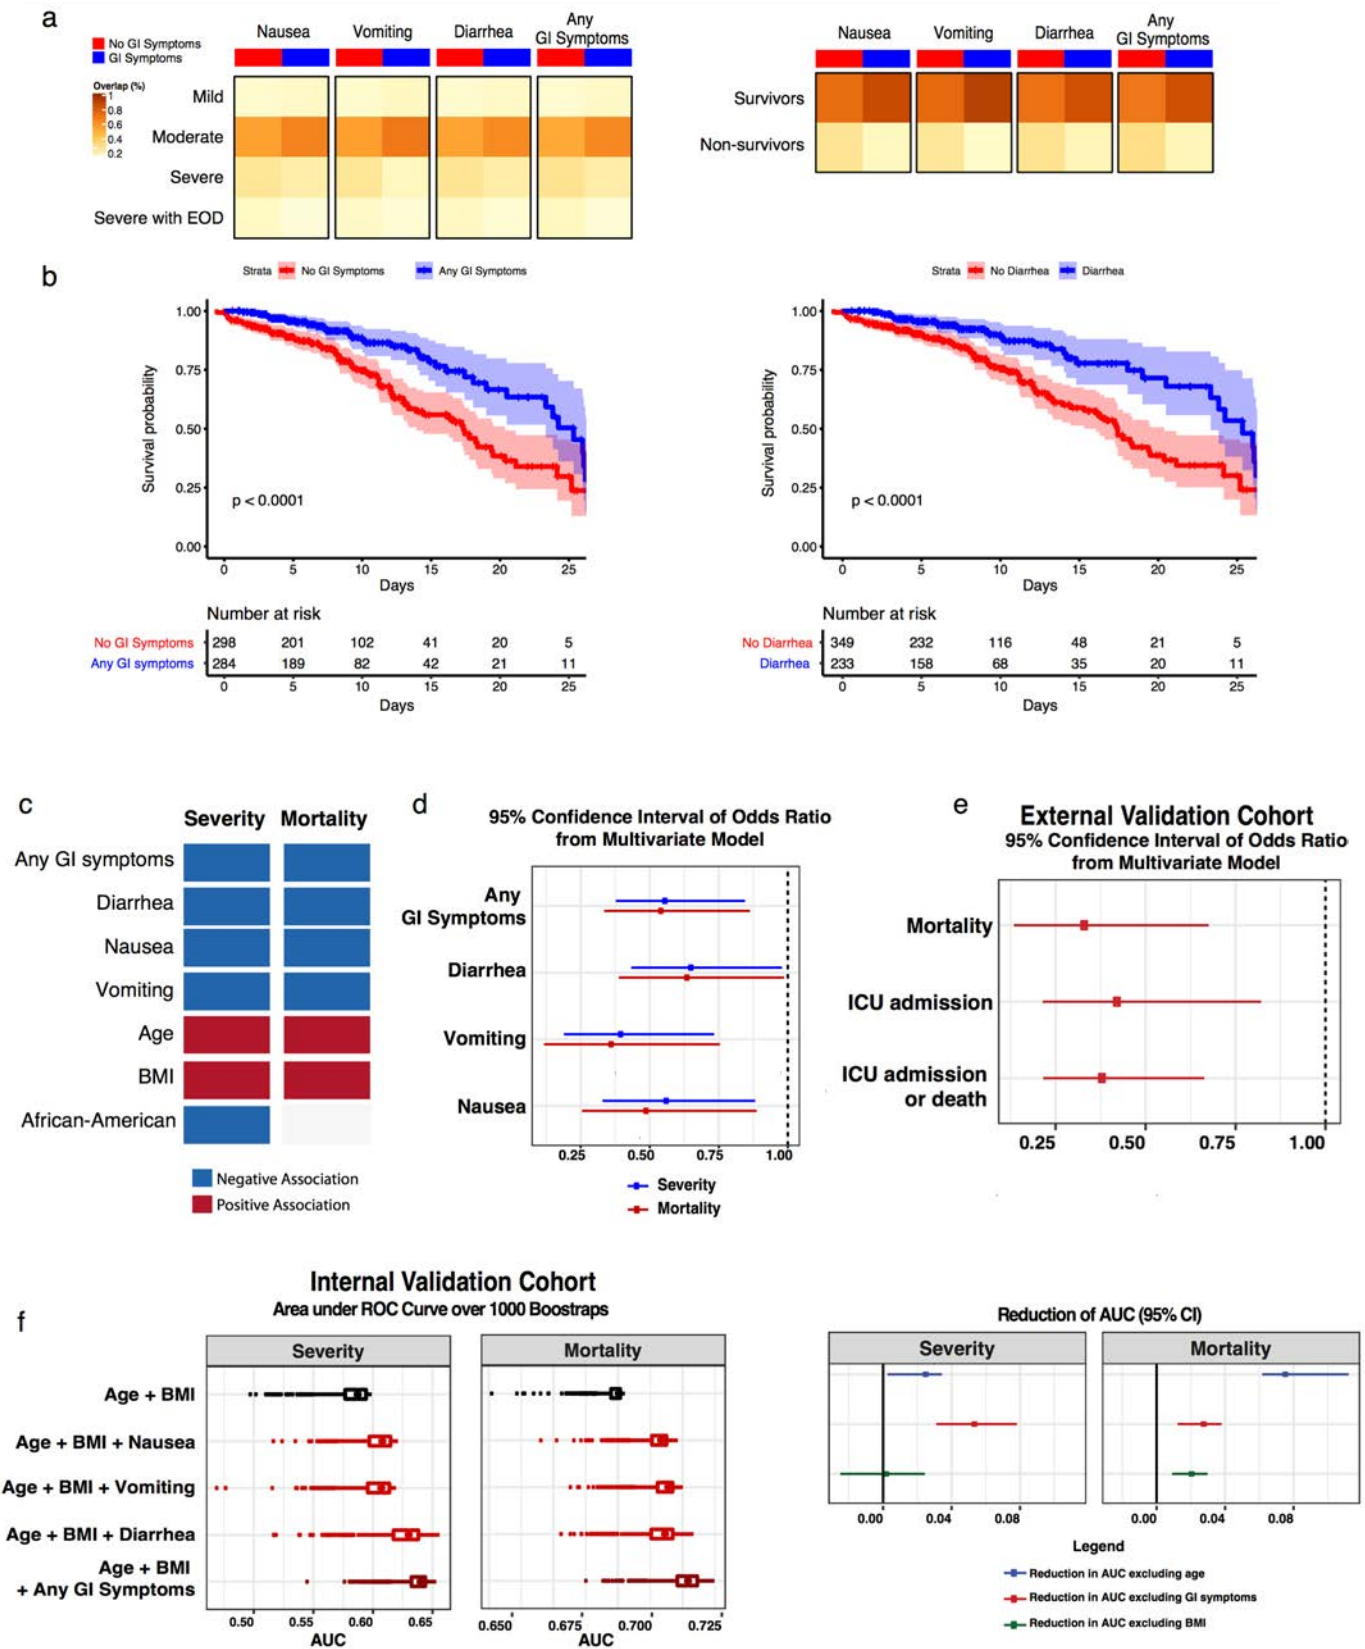

**a**, Inverse association between GI symptoms (nausea, vomiting, diarrhea, and any GI symptoms) with severity and mortality in the discovery cohort. For each GI symptom (columns), the percentage of patients allocated (as indicated by % overlap) to severity and mortality status (rows) is displayed. P-values from Fisher-Exact test for the association between GI symptoms and severity (less than 0.001) or mortality (less than 0.05). **b**, Kaplan-Meier (KM) curves for survival stratified by any GI Symptoms (left panel) and diarrhea (right panel) for patients in the Discovery Cohort. P-values from log-rank test and 95% confidence intervals of KM curves are shown. Below each KM curve, the number of patients at risk are reported for the respective time points. **c**, Significant variables associated with mortality and severity in multivariate logistic regression. Significant associations were derived via 95% confidence intervals based on 1000 bootstrap iterations. Negative associations are displayed in blue; while positive associations in red. Severity and mortality were modeled as function of each individual GI symptom (i.e., nausea, vomiting and diarrhea) and any GI symptoms, and covariates including age, gender, BMI, hypertension, diabetes, lung and heart diseases. This plot shows the sign of association of each GI symptom and the covariates which were found significant across different GI symptoms models. **d**, Confidence intervals of odds ratio (95%) of GI symptoms based on 1000 bootstrap iterations based on multivariate logistic regression for severity (blue) and mortality (red). **e**, Validation based on the external cohort. Confidence intervals of odds ratio (95%) of diarrhea covariate based on 1000 bootstrap iterations to capture mortality, ICU and composite outcome of ICU admission or death. Results are based on multivariate models after accounting for confounders such as BMI, age, gender, lung disease, heart diseases and hypertension. **f**, Validation and prediction model based on the internal cohort. Boxplot of AUC over 1000 bootstrap iterations to predict Mortality and Severity status in the validation cohort (top panel). Confidence intervals of the reduction in AUC (95%) based on 1000 bootstrap iterations for the model “Age + BMI + Any GI Symptoms” after removing age (blue), GI symptoms (red) and BMI (dark-green).



## Fig. 2: COVID-19 patients with GI symptoms have reduced levels of circulating inflammatory cytokines.

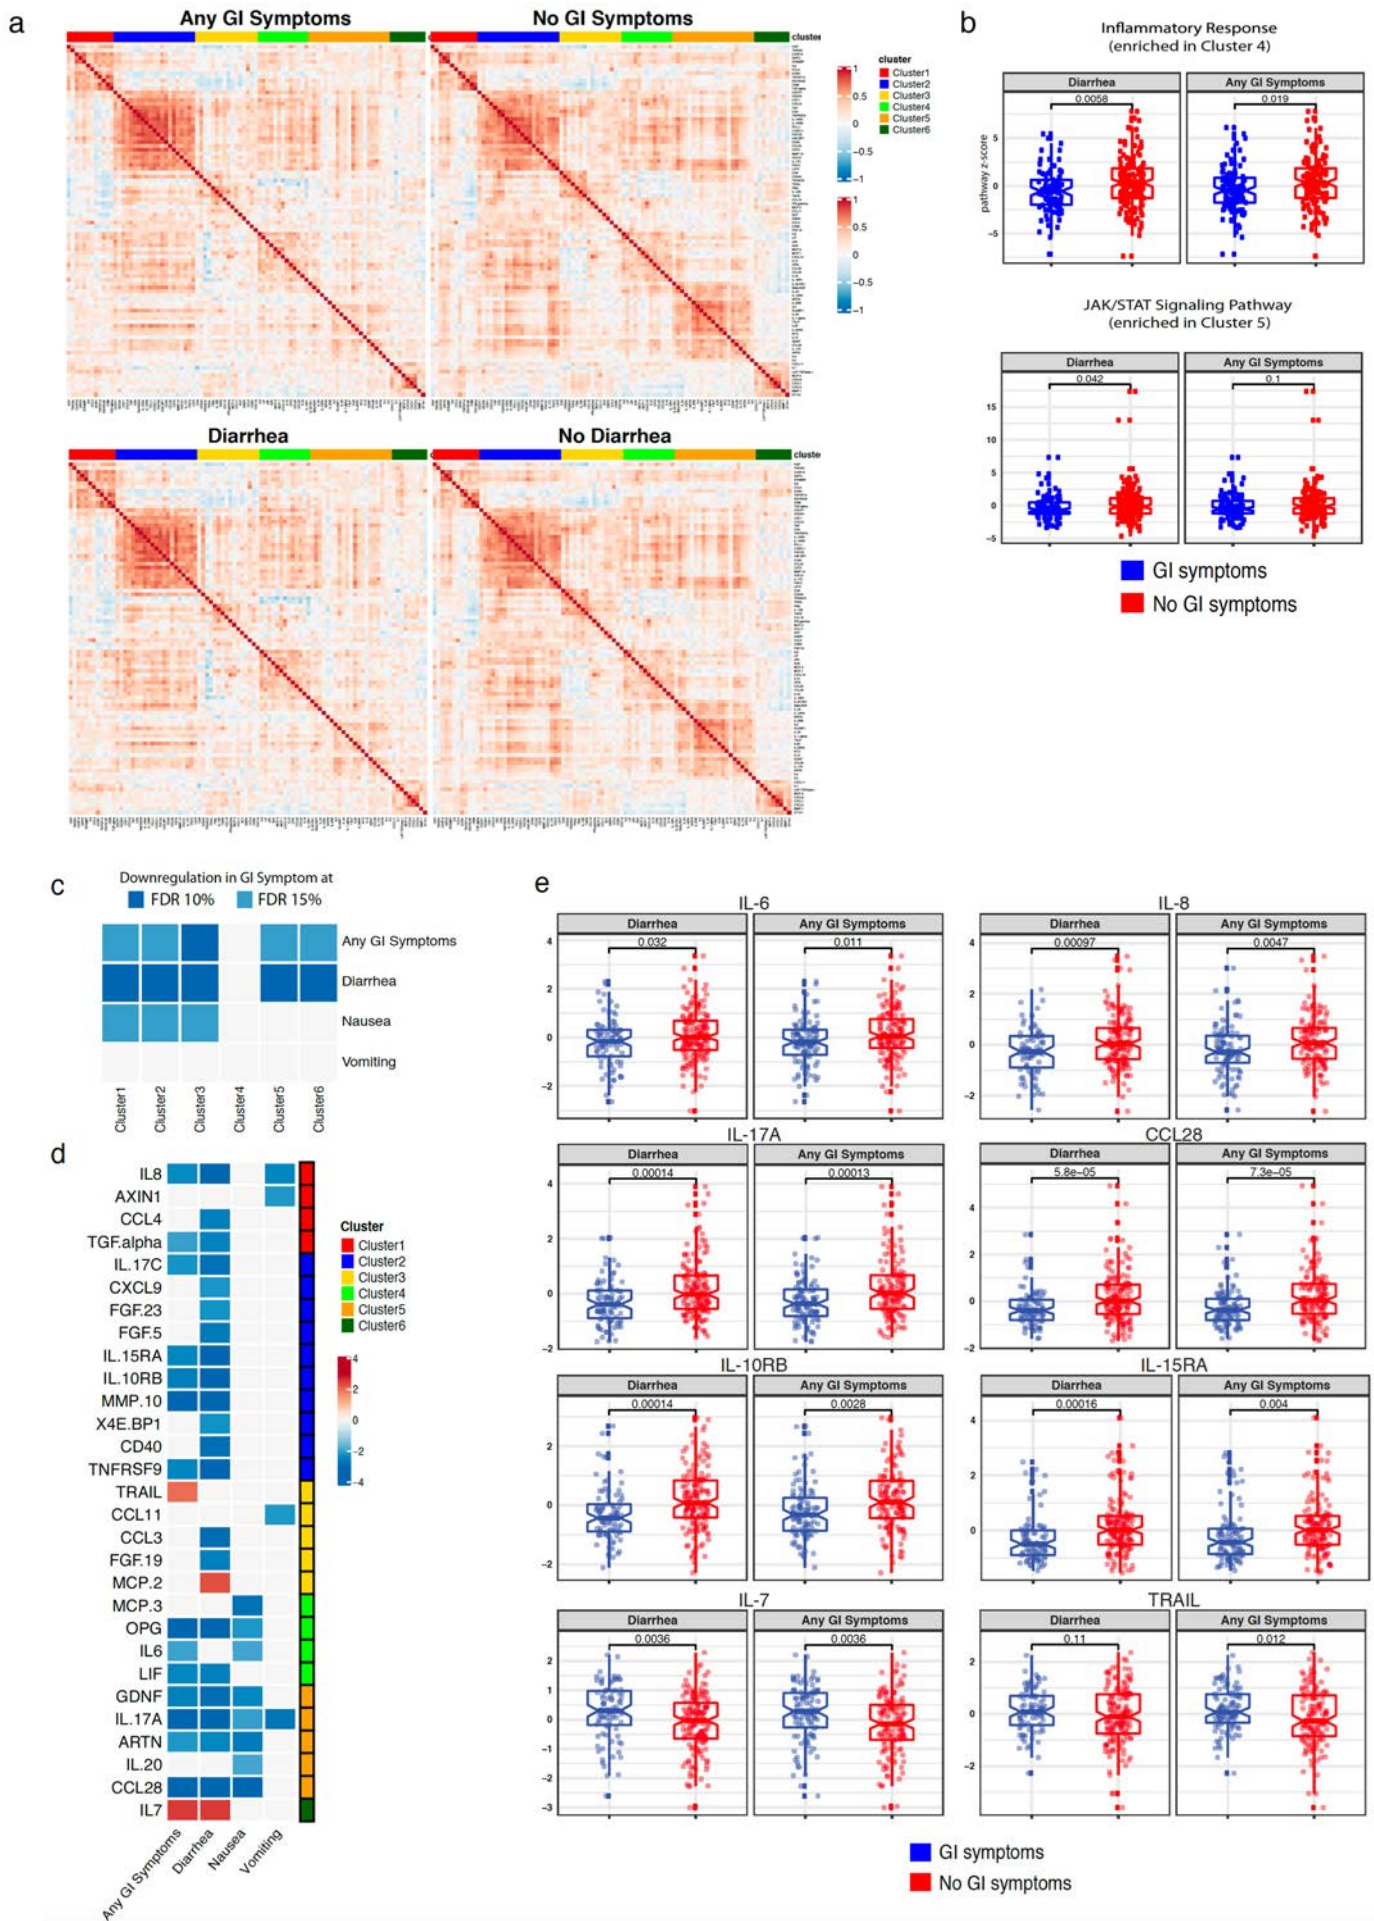

**a**, Correlation matrix (Pearson's) for 92 markers contained in multiplexed proteomic platform (Olink) across patients with any GI symptoms (top left panel) compared with no GI symptoms (top right panel) and patients with diarrhea (bottom left panel) compared with patients without diarrhea (bottom right panel). Cluster assignment derived based on consensus clustering is reported on the top of the heatmap. **b**, Boxplot of "Hallmark Inflammatory Response" and "KEGG JAK/STAT Signaling pathway" z-scores stratified by GI symptoms. P-values from unpaired t-tests are reported. "Hallmark Immune Response" and "Hallmark JAK/STAT Signaling" pathways were found significantly enriched at 10% FDR in Cluster 4 and Cluster 5, respectively. **c**, Association between proteomic clusters and GI symptoms. This association was derived by comparing clusters signatures between asymptomatic and symptomatic groups via t-test. Associations significant at 10% (dark blue) and 15% (light blue) FDR are reported. **d**, Analytes associated with GI symptoms at 10% FDR based on unpaired t-test. The intensity of the color is proportional to the  $-\log_{10}$  p-value. Negative associations are displayed in blue; while positive associations in red. On the right side of the heatmap, the cluster assignment for each marker is reported. **e**, Boxplot of select differentially expressed markers stratified by GI symptoms. P-values from unpaired t-tests are reported.



### Fig. 3: Clinical timing and histologic and endoscopic features of COVID-19 in the small intestine.

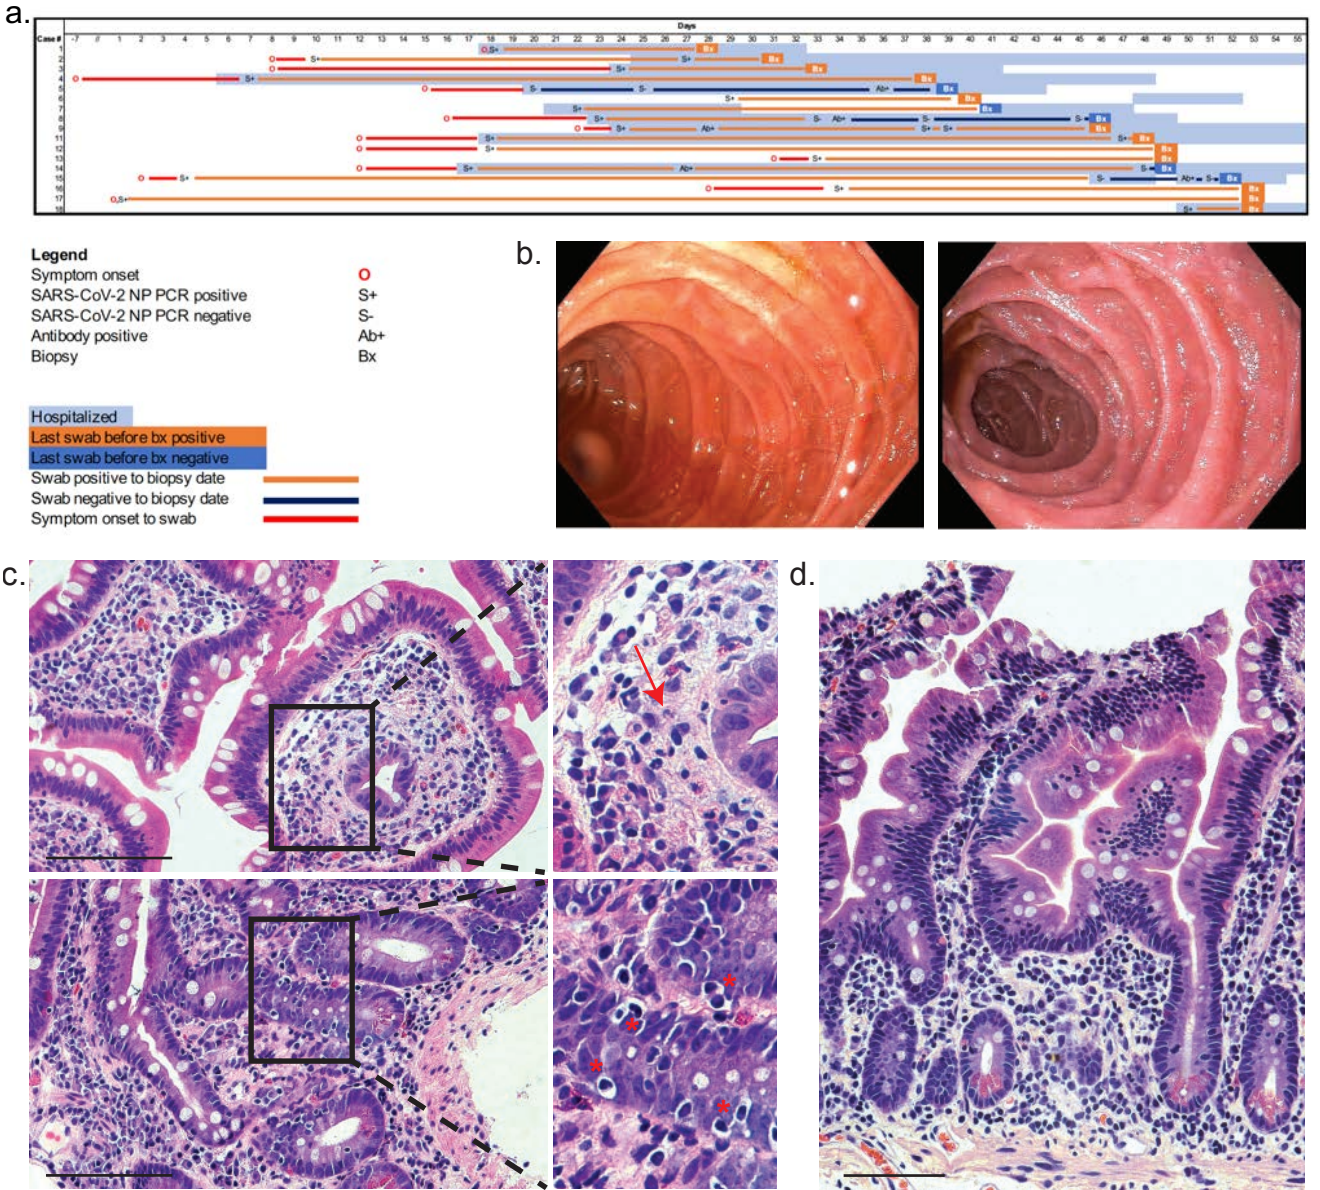

**a**, Timing of endoscopic evaluation with respect to COVID-19 course. **b**, Representative endoscopic views of the duodenum in COVID-19+ (left) and control (right) subjects. **c**, Histologic signs of inflammation detected in duodenal biopsies of COVID-19 patients including neutrophils (arrow) and increased intraepithelial lymphocytes (\*). **d**, Histologically normal duodenal tissue in a COVID-19 patient. Scale bar; 100  $\mu$ m.



## Fig. 4: SARS-CoV-2 viral particles and protein are detectable in intestinal tissue of COVID-19 patients.

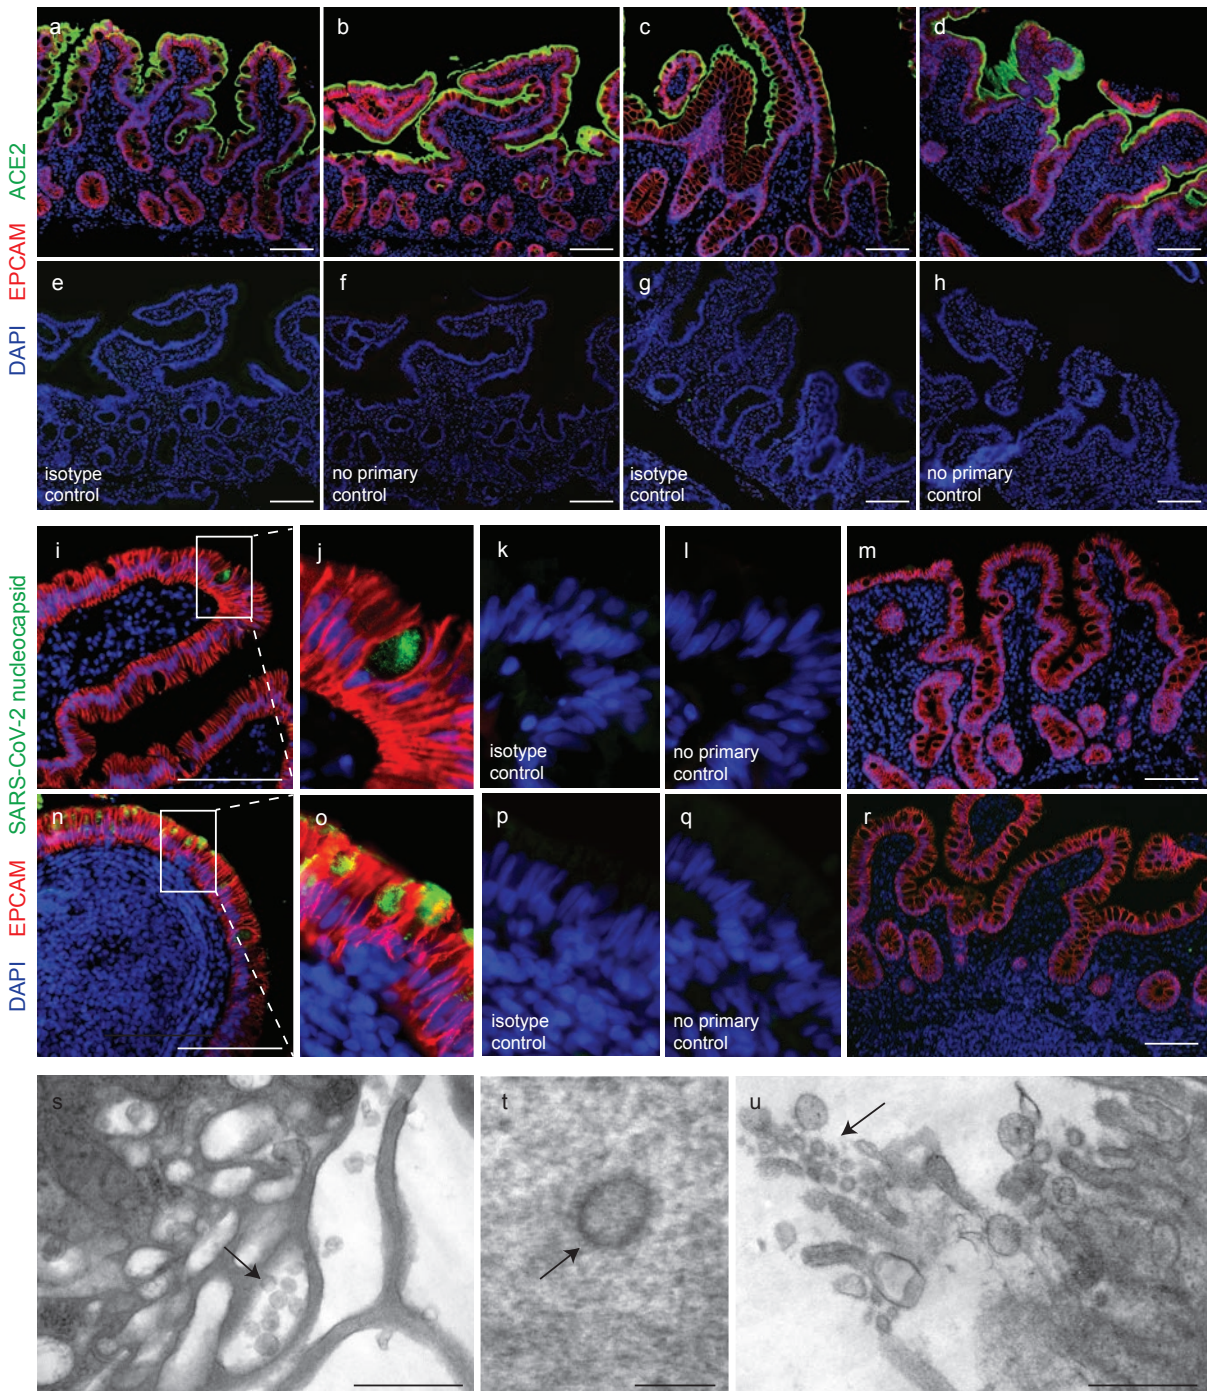

**a-h**, Immunofluorescent staining of duodenal (**a,b**) and ileal (**c,d**) biopsies of COVID-19 patients (**b,d**) and controls (**a,c**) with ACE2 (green), EPCAM (red) and DAPI (blue) including isotype (**e,g**) and no primary (**f,h**) controls.

**i-r**, Immunofluorescent staining of duodenal (**i-m**) and ileal (**n-q**) biopsies from COVID-19 patients (**i-l, n-q**) and controls (**m,r**) with SARS-CoV-2 nucleocapsid (green), EPCAM (red) and DAPI (blue) including isotype (**k,p**) and no primary (**j,q**) controls.

**s-u**, Electron microscopy of duodenal biopsies (**s, t**) and an ileal biopsy (**u**) from COVID-19 patients showing viral particles (arrows). Scale bars; 100  $\mu\text{m}$  (**a-r**), 0.5  $\mu\text{m}$  (**s,u**), 0.1  $\mu\text{m}$  (**t**).

# Fig. 5: Identification of immune cell signatures in intestinal biopsies and blood from COVID-19 patients and controls based on mass cytometry.

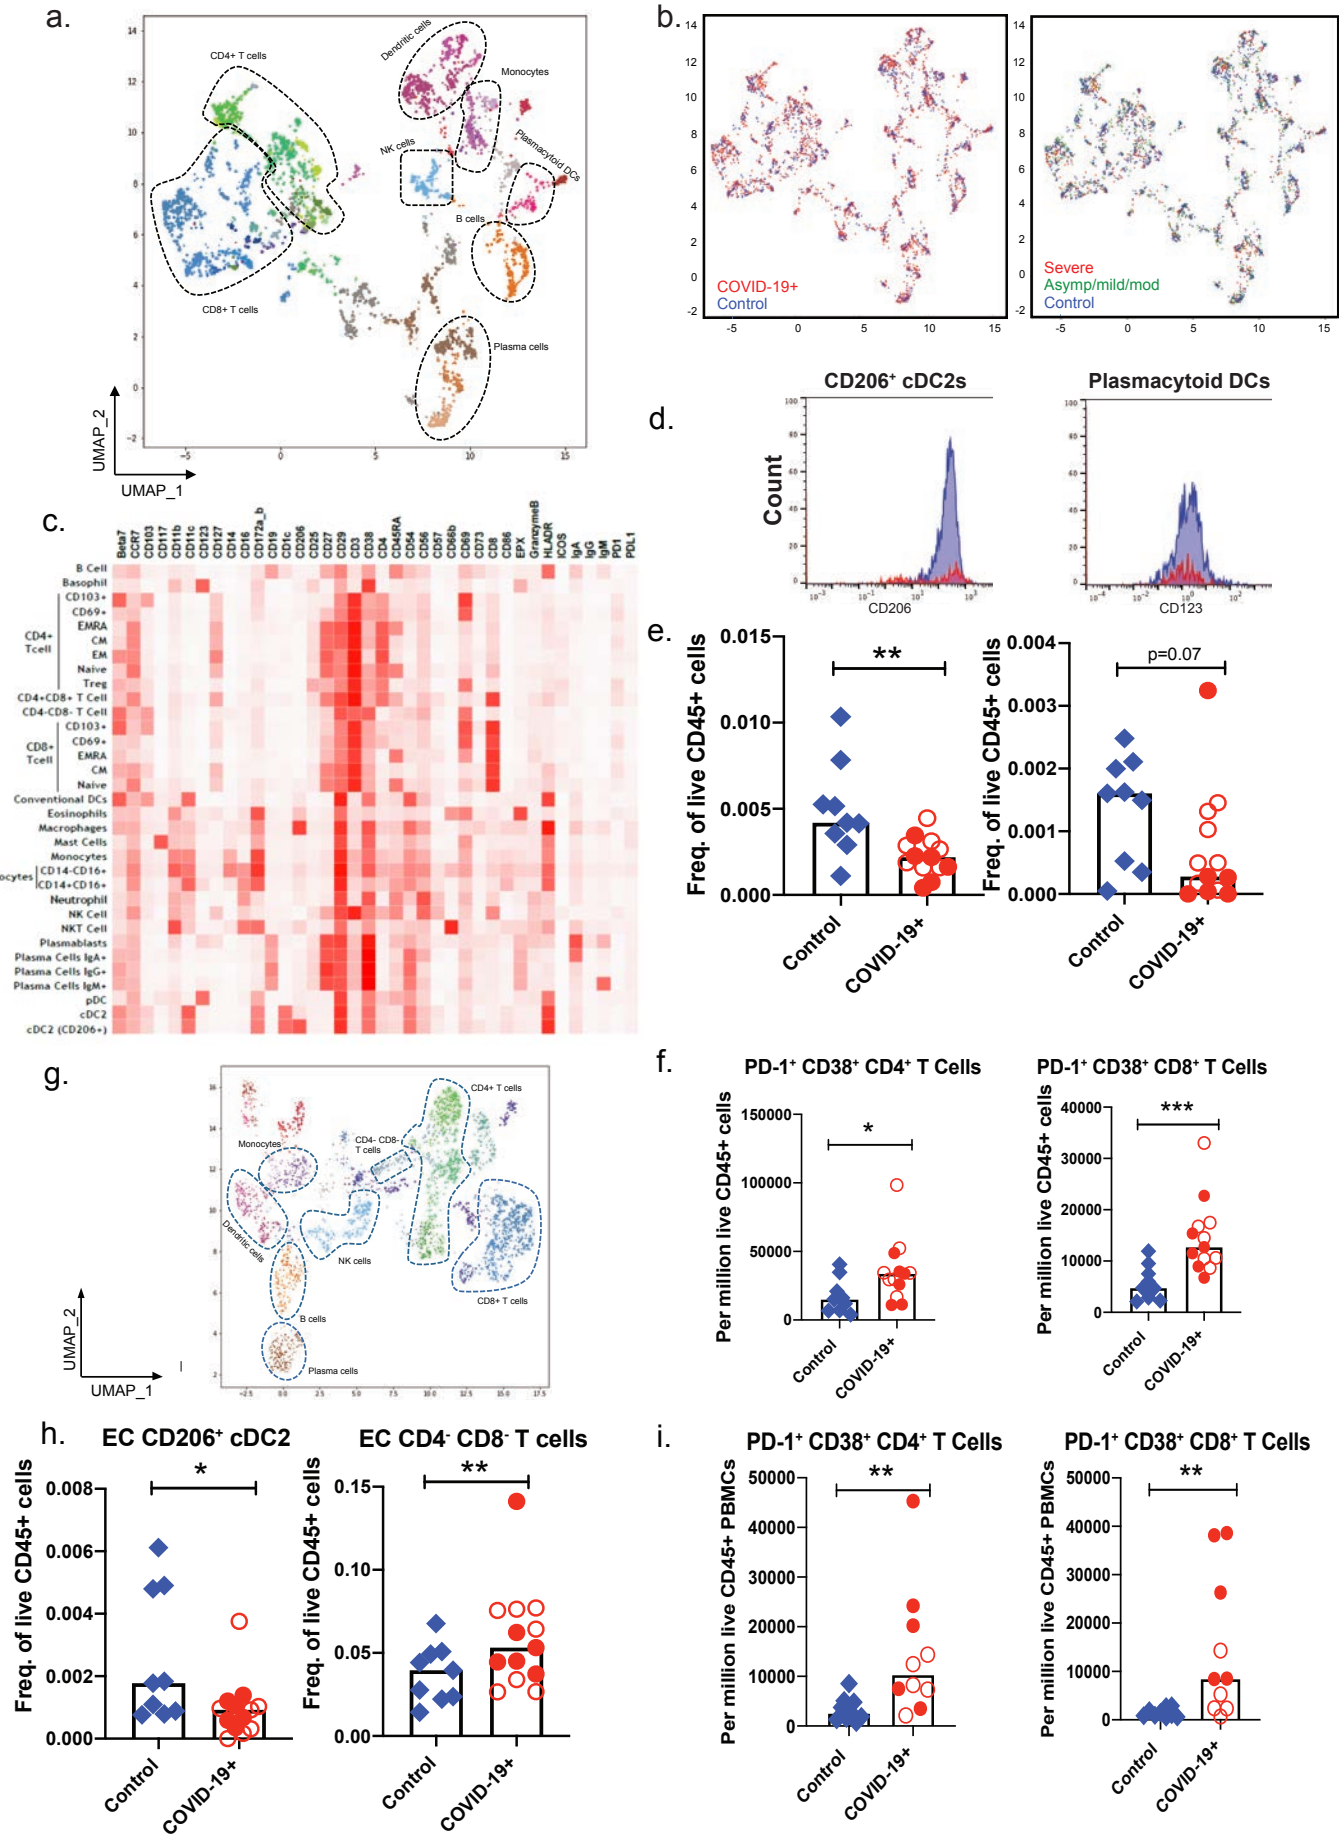

**a**, Uniform Manifold Approximation and Projection (UMAP) presentation of the eight clusters of immune populations based on 38 markers in lamina propria. **b**, UMAP presentation of clusters defined by COVID-19 (Red) vs Controls (Blue) and clusters defined by cohort where controls are indicated in blue, severe COVID-19 patients indicated in red and asymptomatic/mild/moderate COVID-19 patients are indicated in green in lamina propria. **c**, The heatmap shows the different immune populations based on specific cell type markers in lamina propria of COVID-19 patients and controls. **d**, The histograms shows the decrease in the expression of CD206 and CD123 in dendritic cell populations of COVID-19 patients (red) compared to the controls (blue). **e**, Unsupervised analyses of immune cells: The bar plots show the relative frequencies of different myeloid and lymphocytic immune populations namely CD206+ cDC2 and plasmacytoid DCs in lamina propria of controls (blue) and COVID-19 patients (red).. **f**, Supervised analyses: The bar graphs depict alterations in PD-1+ CD38+ (exhausted) CD4+ and CD8+ T cell subsets in lamina propria of controls (blue) and COVID-19 patients (red). **g**, Uniform manifold approximation and projection (UMAP) presentation of the eight clusters of immune populations based on 38 markers in epithelial compartment of small intestinal biopsies. **h**, Unsupervised analyses of immune cells: The bar plots show the relative frequencies of CD206+ cDC2 dendritic cells and CD4- CD8- T cells in the intraepithelial compartment of controls (blue) and COVID-19 patients (red). **i**, Supervised analyses on PBMCs indicating immune cell changes in blood : The bar graphs depict alterations in PD-1+ CD38+ (exhausted) CD4+ and CD8+ T cell subsets in blood of controls (blue) and COVID-19 patients (red).  
Open red circles denote patients with asymptomatic/mild/moderate disease while filled red circles denote patients with severe COVID-19.



## Fig. 6: Transcriptional changes in intestinal biopsies from COVID-19 patients against non-infected controls.

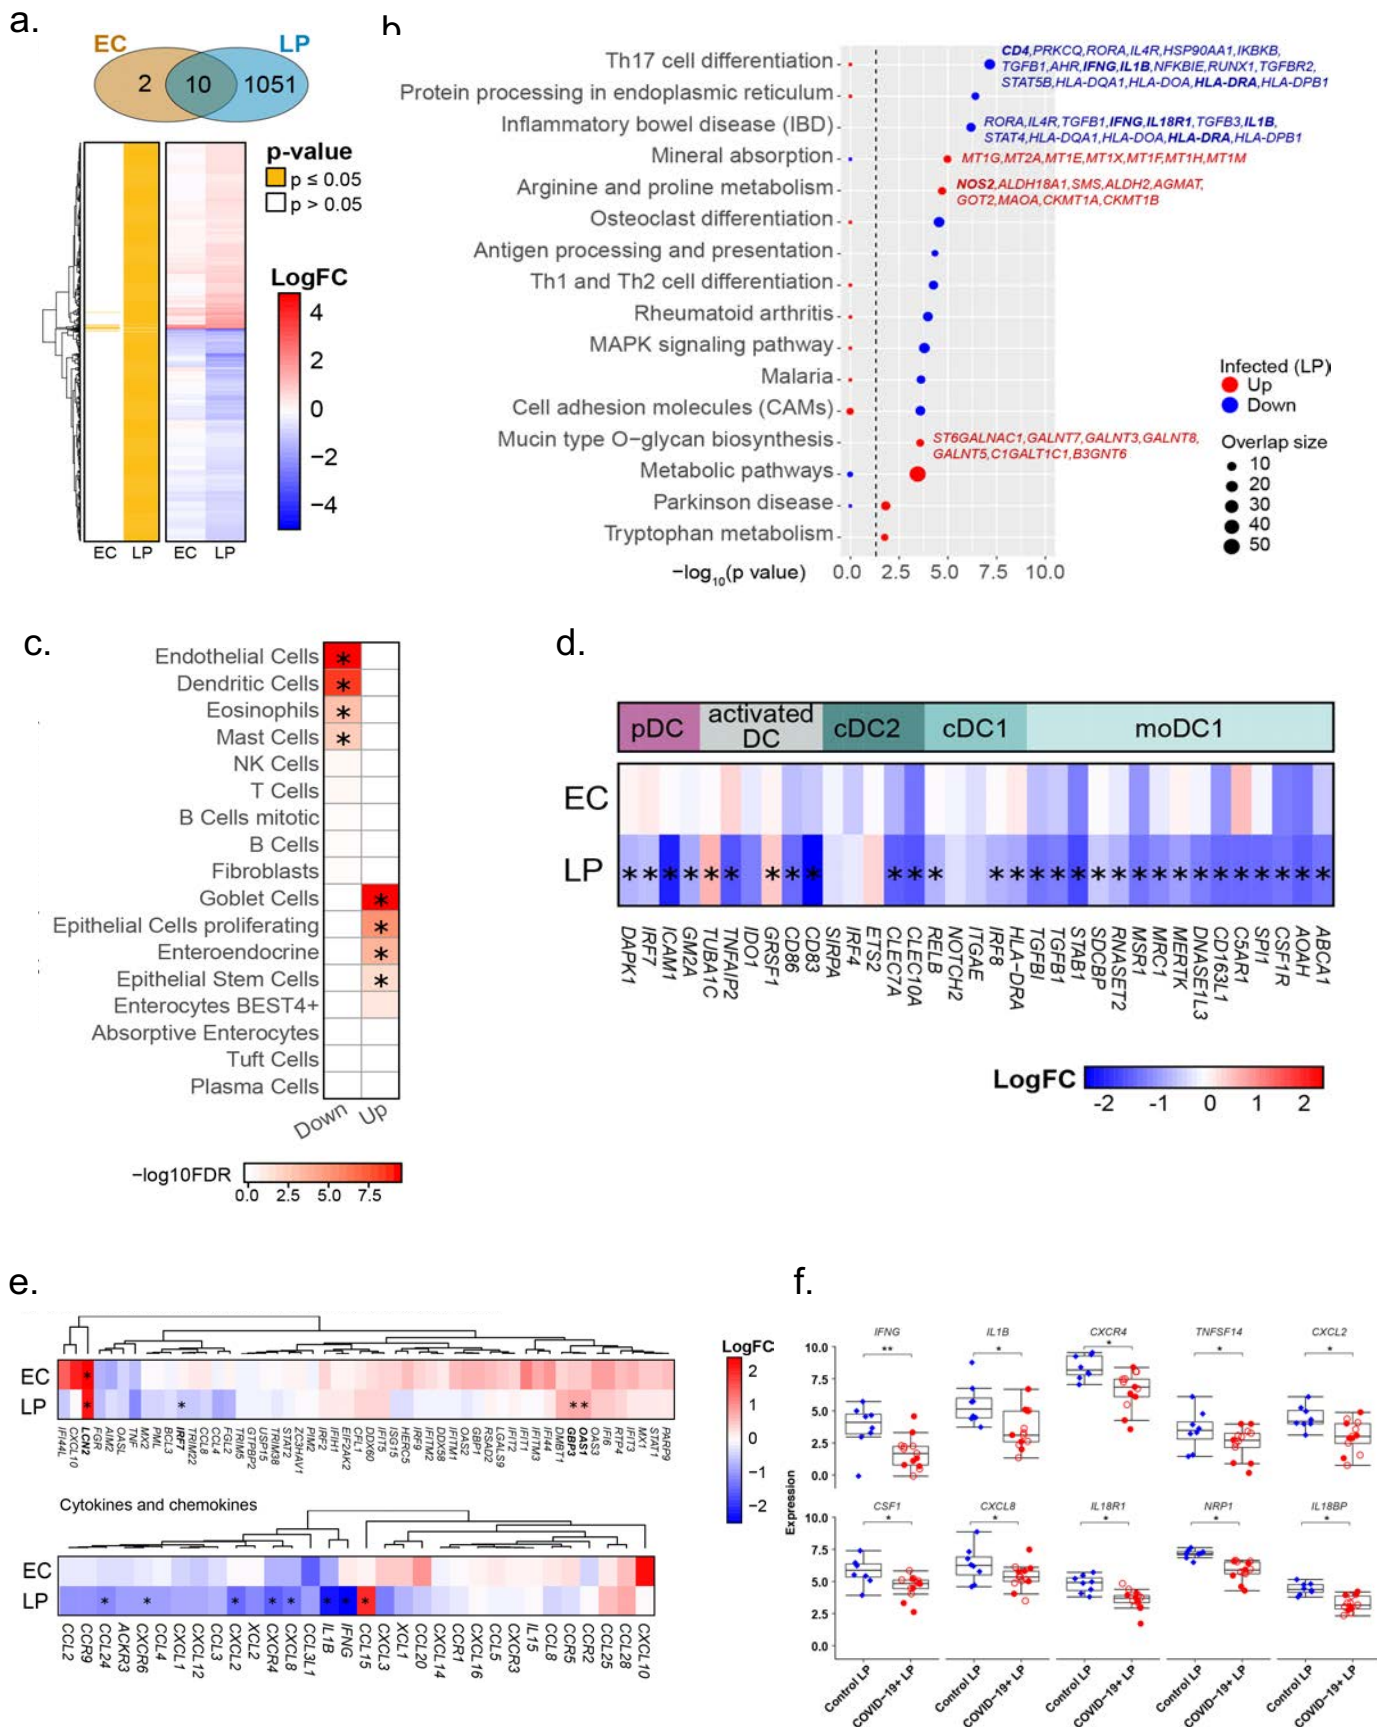

**a**, Hierarchical clustering of average expression changes for 1,063 genes (rows) with induced (red) or depleted (blue) expression ( $FDR \leq 0.05$ ) in the epithelial layer (EC) and lamina propria (LP) sections of intestinal biopsies from COVID-19 patients. The panel on the left indicates significant genes for each tissue section in yellow. The color bar indicates the average log<sub>2</sub> fold-change (FC). **b**, Top enriched pathways (KEGG) induced (red) or depleted (blue) in LP. The dash line indicates the  $p \leq 0.05$  cutoff. Gene names for are indicated for main pathways related to inflammation and cell type composition. The dash line indicates the  $p \leq 0.05$  cutoff. **c**, Deconvolution of main intestinal (GI) cell types enriched or depleted in the LP section of COVID-19 convalescent patients against controls. Reference scRNA-seq cell type signatures were taken from Smillie et al 2019. ( $p \leq 0.05$ , Fisher's exact test). **d**, Average expression changes for dendritic cell markers in the LP and EC sections. The yellow boxes indicate significant genes for each tissue section. The color bar indicates the average log<sub>2</sub> fold-change (FC). **e**, Hierarchical clustering of average expression changes (columns) in the EC and LP sections for genes related to antiviral response to SARS-CoV-2 in post-mortem lung tissue of COVID-19 patients as described by Blanco-Mello et al. 2020 (top panel) and for cytokines and chemokines (bottom panel). Significant genes are indicated by the asterisks. The color bar indicates the average log<sub>2</sub> fold-change (FC). **f**, The gene expression levels for the top 10 significant chemokines and cytokines in the LP section of COVID-19 patients (13) and controls (8). \* $p < 0.05$ , \*\* $p < 0.01$ . Open red circles denote patients with asymptomatic/mild/moderate disease while filled red circles denote patients with severe COVID-19.
