# Supplementary material for: Gastrointestinal involvement attenuates COVID-19 severity and mortality
Source: bioRxiv or medRxiv preprint supplement (doi:10.1101/2020.09.07.20187666), 2020-11-11
Supplement: Supplementary file [file 2020.09.07.20187666-1.pdf]

**Supplementary Table 1.** Criteria for scoring disease severity in COVID-19 patients.

| Severity Score                     | Criteria                                                                                                                                                                                                                                                                                  |
|------------------------------------|-------------------------------------------------------------------------------------------------------------------------------------------------------------------------------------------------------------------------------------------------------------------------------------------|
| Mild                               | SpO <sub>2</sub> >94% on room air AND no pneumonia on imaging                                                                                                                                                                                                                             |
| Moderate                           | SpO <sub>2</sub> <94% on room air OR pneumonia on imaging                                                                                                                                                                                                                                 |
| Severe                             | High flow nasal cannula (HFNC), non-rebreather mask (NRBM), Bilevel Positive Airway Pressure (non-invasive positive airway ventilation), or Mechanical ventilation AND no pressor medications AND creatinine clearance > 30 AND ALT < 5x upper limit of normal                            |
| Severe with end organ damage (EOD) | High flow nasal cannula (HFNC), non-rebreather mask (NRBM), Bilevel Positive Airway Pressure (non-invasive positive airway ventilation), or Mechanical ventilation AND pressor medications OR creatinine clearance <30 OR new renal replacement therapy OR ALT > 5x upper limit of normal |

**Supplementary Table 2.** Confidence intervals of odds ratio based on 1000 bootstrap iterations.

|                                                   |             |            |              |
|---------------------------------------------------|-------------|------------|--------------|
| <b>Severity</b>                                   | <b>2.5%</b> | <b>50%</b> | <b>97.5%</b> |
| (Intercept)                                       | 0.015       | 0.071      | 0.320        |
| <b>Any GI Symptom</b>                             | 0.378       | 0.559      | 0.844        |
| baseline.GenderMale                               | 0.939       | 1.380      | 2.090        |
| baseline.Age                                      | 1.004       | 1.016      | 1.031        |
| baseline.DIABETES                                 | 0.600       | 0.995      | 1.729        |
| baseline.BMI                                      | 1.009       | 1.039      | 1.069        |
| baseline.RACE_ETHNICITY_BLACK OR AFRICAN-AMERICAN | 0.293       | 0.503      | 0.876        |
| baseline.RACE_ETHNICITY_HISPANIC                  | 0.688       | 1.188      | 2.035        |
| baseline.RACE_ETHNICITY_OTHER                     | 0.771       | 1.286      | 2.245        |
| baseline.HTN                                      | 0.636       | 0.990      | 1.543        |
| baseline.Lung.Disease                             | 0.272       | 0.562      | 1.063        |
| baseline.Heart.Disease                            | 0.673       | 1.095      | 1.842        |
|                                                   |             |            |              |
|                                                   | <b>2.5%</b> | <b>50%</b> | <b>97.5%</b> |
| (Intercept)                                       | 0.013       | 0.060      | 0.259        |
| <b>Diarrhea</b>                                   | 0.433       | 0.653      | 0.978        |
| baseline.GenderMale                               | 0.963       | 1.413      | 2.124        |
| baseline.Age                                      | 1.005       | 1.017      | 1.033        |
| baseline.DIABETES                                 | 0.604       | 1.012      | 1.747        |
| baseline.BMI                                      | 1.008       | 1.037      | 1.067        |
| baseline.RACE_ETHNICITY_BLACK OR AFRICAN-AMERICAN | 0.300       | 0.521      | 0.920        |
| baseline.RACE_ETHNICITY_HISPANIC                  | 0.707       | 1.215      | 2.098        |
| baseline.RACE_ETHNICITY_OTHER                     | 0.777       | 1.311      | 2.280        |
| baseline.HTN                                      | 0.634       | 0.977      | 1.529        |
| baseline.Lung.Disease                             | 0.267       | 0.546      | 1.042        |
| baseline.Heart.Disease                            | 0.686       | 1.113      | 1.826        |
|                                                   |             |            |              |
|                                                   | <b>2.5%</b> | <b>50%</b> | <b>97.5%</b> |
| (Intercept)                                       | 0.013       | 0.058      | 0.271        |
| <b>Nausea</b>                                     | 0.329       | 0.563      | 0.880        |
| baseline.GenderMale                               | 0.932       | 1.364      | 2.089        |
| baseline.Age                                      | 1.005       | 1.018      | 1.032        |
| baseline.DIABETES                                 | 0.609       | 1.015      | 1.738        |
| baseline.BMI                                      | 1.007       | 1.036      | 1.065        |
| baseline.RACE_ETHNICITY_BLACK OR AFRICAN-AMERICAN | 0.322       | 0.543      | 0.946        |
| baseline.RACE_ETHNICITY_HISPANIC                  | 0.749       | 1.264      | 2.169        |
| baseline.RACE_ETHNICITY_OTHER                     | 0.816       | 1.340      | 2.338        |
| baseline.HTN                                      | 0.615       | 0.950      | 1.477        |
| baseline.Lung.Disease                             | 0.248       | 0.516      | 0.980        |
| baseline.Heart.Disease                            | 0.676       | 1.091      | 1.830        |
|                                                   |             |            |              |
|                                                   | <b>2.5%</b> | <b>50%</b> | <b>97.5%</b> |
| (Intercept)                                       | 0.012       | 0.054      | 0.236        |
| <b>Vomiting</b>                                   | 0.190       | 0.399      | 0.732        |
| baseline.GenderMale                               | 0.938       | 1.395      | 2.107        |
| baseline.Age                                      | 1.006       | 1.018      | 1.032        |
| baseline.DIABETES                                 | 0.615       | 1.032      | 1.744        |
| baseline.BMI                                      | 1.006       | 1.036      | 1.065        |
| baseline.RACE_ETHNICITY_BLACK OR AFRICAN-AMERICAN | 0.330       | 0.558      | 0.962        |
| baseline.RACE_ETHNICITY_HISPANIC                  | 0.766       | 1.286      | 2.191        |
| baseline.RACE_ETHNICITY_OTHER                     | 0.802       | 1.337      | 2.307        |
| baseline.HTN                                      | 0.610       | 0.950      | 1.511        |
| baseline.Lung.Disease                             | 0.261       | 0.526      | 0.981        |
| baseline.Heart.Disease                            | 0.703       | 1.123      | 1.886        |

|                                                   |             |            |              |
|---------------------------------------------------|-------------|------------|--------------|
| <b>Mortality</b>                                  | <b>2.5%</b> | <b>50%</b> | <b>97.5%</b> |
| (Intercept)                                       | 0.000       | 0.003      | 0.022        |
| <b>Any GI Symptom</b>                             | 0.335       | 0.544      | 0.861        |
| baseline.GenderMale                               | 0.679       | 1.049      | 1.703        |
| baseline.Age                                      | 1.036       | 1.053      | 1.074        |
| baseline.DIABETES                                 | 0.527       | 0.930      | 1.605        |
| baseline.BMI                                      | 1.010       | 1.043      | 1.081        |
| baseline.RACE_ETHNICITY_BLACK OR AFRICAN-AMERICAN | 0.529       | 1.035      | 1.959        |
| baseline.RACE_ETHNICITY_HISPANIC                  | 0.867       | 1.597      | 2.899        |
| baseline.RACE_ETHNICITY_OTHER                     | 0.450       | 0.878      | 1.630        |
| baseline.HTN                                      | 0.600       | 1.007      | 1.665        |
| baseline.Lung.Disease                             | 0.342       | 0.778      | 1.577        |
| baseline.Heart.Disease                            | 0.652       | 1.154      | 2.028        |
|                                                   |             |            |              |
|                                                   | <b>2.5%</b> | <b>50%</b> | <b>97.5%</b> |
| (Intercept)                                       | 0.000       | 0.003      | 0.017        |
| <b>Diarrhea</b>                                   | 0.388       | 0.638      | 0.985        |
| baseline.GenderMale                               | 0.702       | 1.076      | 1.737        |
| baseline.Age                                      | 1.038       | 1.055      | 1.076        |
| baseline.DIABETES                                 | 0.531       | 0.945      | 1.608        |
| baseline.BMI                                      | 1.007       | 1.041      | 1.079        |
| baseline.RACE_ETHNICITY_BLACK OR AFRICAN-AMERICAN | 0.562       | 1.071      | 2.020        |
| baseline.RACE_ETHNICITY_HISPANIC                  | 0.901       | 1.640      | 2.898        |
| baseline.RACE_ETHNICITY_OTHER                     | 0.468       | 0.900      | 1.709        |
| baseline.HTN                                      | 0.595       | 1.001      | 1.665        |
| baseline.Lung.Disease                             | 0.333       | 0.752      | 1.561        |
| baseline.Heart.Disease                            | 0.660       | 1.166      | 2.020        |
|                                                   |             |            |              |
|                                                   | <b>2.5%</b> | <b>50%</b> | <b>97.5%</b> |
| (Intercept)                                       | 0.000       | 0.003      | 0.019        |
| <b>Nausea</b>                                     | 0.255       | 0.490      | 0.886        |
| baseline.GenderMale                               | 0.669       | 1.041      | 1.719        |
| baseline.Age                                      | 1.038       | 1.055      | 1.075        |
| baseline.DIABETES                                 | 0.528       | 0.938      | 1.623        |
| baseline.BMI                                      | 1.006       | 1.040      | 1.077        |
| baseline.RACE_ETHNICITY_BLACK OR AFRICAN-AMERICAN | 0.591       | 1.112      | 2.116        |
| baseline.RACE_ETHNICITY_HISPANIC                  | 0.956       | 1.718      | 3.085        |
| baseline.RACE_ETHNICITY_OTHER                     | 0.474       | 0.916      | 1.703        |
| baseline.HTN                                      | 0.579       | 0.960      | 1.571        |
| baseline.Lung.Disease                             | 0.313       | 0.699      | 1.457        |
| baseline.Heart.Disease                            | 0.655       | 1.155      | 2.007        |
|                                                   |             |            |              |
|                                                   | <b>2.5%</b> | <b>50%</b> | <b>97.5%</b> |
| (Intercept)                                       | 0.000       | 0.002      | 0.016        |
| <b>Vomiting</b>                                   | 0.116       | 0.364      | 0.753        |
| baseline.GenderMale                               | 0.690       | 1.070      | 1.759        |
| baseline.Age                                      | 1.038       | 1.055      | 1.076        |
| baseline.DIABETES                                 | 0.558       | 0.970      | 1.652        |
| baseline.BMI                                      | 1.006       | 1.040      | 1.077        |
| baseline.RACE_ETHNICITY_BLACK OR AFRICAN-AMERICAN | 0.609       | 1.145      | 2.144        |
| baseline.RACE_ETHNICITY_HISPANIC                  | 1.004       | 1.746      | 3.086        |
| baseline.RACE_ETHNICITY_OTHER                     | 0.463       | 0.907      | 1.697        |
| baseline.HTN                                      | 0.586       | 0.974      | 1.620        |
| baseline.Lung.Disease                             | 0.318       | 0.717      | 1.489        |
| baseline.Heart.Disease                            | 0.670       | 1.186      | 2.025        |

|                                                   |             |            |              |
|---------------------------------------------------|-------------|------------|--------------|
| <b>ICU admission</b>                              | <b>2.5%</b> | <b>50%</b> | <b>97.5%</b> |
| (Intercept)                                       | 0.03        | 0.17       | 1.11         |
| <b>Any GI Symptom</b>                             | 0.46        | 0.75       | 1.19         |
| baseline.GenderMale                               | 1.23        | 2.00       | 3.26         |
| baseline.Age                                      | 0.98        | 0.99       | 1.01         |
| baseline.DIABETES                                 | 0.91        | 1.70       | 3.23         |
| baseline.BMI                                      | 0.98        | 1.02       | 1.05         |
| baseline.RACE_ETHNICITY_BLACK OR AFRICAN-AMERICAN | 0.26        | 0.57       | 1.20         |
| baseline.RACE_ETHNICITY_HISPANIC                  | 0.79        | 1.50       | 2.95         |
| baseline.RACE_ETHNICITY_OTHER                     | 0.48        | 0.98       | 1.99         |
| baseline.HTN                                      | 0.34        | 0.61       | 1.08         |
| baseline.Lung.Disease                             | 0.15        | 0.63       | 1.45         |
| baseline.Heart.Disease                            | 0.20        | 0.51       | 0.97         |
|                                                   |             |            |              |
|                                                   | <b>2.5%</b> | <b>50%</b> | <b>97.5%</b> |
| (Intercept)                                       | 0.02        | 0.16       | 1.10         |
| <b>Diarrhea</b>                                   | 0.45        | 0.76       | 1.25         |
| baseline.GenderMale                               | 1.23        | 2.00       | 3.27         |
| baseline.Age                                      | 0.98        | 0.99       | 1.01         |
| baseline.DIABETES                                 | 0.89        | 1.70       | 3.25         |
| baseline.BMI                                      | 0.98        | 1.02       | 1.05         |
| baseline.RACE_ETHNICITY_BLACK OR AFRICAN-AMERICAN | 0.26        | 0.56       | 1.19         |
| baseline.RACE_ETHNICITY_HISPANIC                  | 0.78        | 1.50       | 2.96         |
| baseline.RACE_ETHNICITY_OTHER                     | 0.48        | 0.98       | 1.98         |
| baseline.HTN                                      | 0.34        | 0.61       | 1.09         |
| baseline.Lung.Disease                             | 0.15        | 0.62       | 1.44         |
| baseline.Heart.Disease                            | 0.20        | 0.52       | 0.99         |
|                                                   |             |            |              |
|                                                   | <b>2.5%</b> | <b>50%</b> | <b>97.5%</b> |
| (Intercept)                                       | 0.02        | 0.14       | 0.95         |
| <b>Nausea</b>                                     | 0.45        | 0.85       | 1.42         |
| baseline.GenderMale                               | 1.24        | 2.00       | 3.33         |
| baseline.Age                                      | 0.98        | 0.99       | 1.01         |
| baseline.DIABETES                                 | 0.91        | 1.74       | 3.31         |
| baseline.BMI                                      | 0.98        | 1.02       | 1.05         |
| baseline.RACE_ETHNICITY_BLACK OR AFRICAN-AMERICAN | 0.27        | 0.60       | 1.25         |
| baseline.RACE_ETHNICITY_HISPANIC                  | 0.81        | 1.54       | 3.00         |
| baseline.RACE_ETHNICITY_OTHER                     | 0.49        | 0.99       | 1.97         |
| baseline.HTN                                      | 0.33        | 0.59       | 1.06         |
| baseline.Lung.Disease                             | 0.14        | 0.60       | 1.40         |
| baseline.Heart.Disease                            | 0.20        | 0.51       | 0.98         |
|                                                   |             |            |              |
|                                                   | <b>2.5%</b> | <b>50%</b> | <b>97.5%</b> |
| (Intercept)                                       | 0.02        | 0.15       | 0.98         |
| <b>Vomiting</b>                                   | 0.16        | 0.53       | 1.08         |
| baseline.GenderMale                               | 1.21        | 1.98       | 3.26         |
| baseline.Age                                      | 0.98        | 0.99       | 1.01         |
| baseline.DIABETES                                 | 0.92        | 1.74       | 3.31         |
| baseline.BMI                                      | 0.98        | 1.02       | 1.05         |
| baseline.RACE_ETHNICITY_BLACK OR AFRICAN-AMERICAN | 0.27        | 0.60       | 1.26         |
| baseline.RACE_ETHNICITY_HISPANIC                  | 0.82        | 1.55       | 3.01         |
| baseline.RACE_ETHNICITY_OTHER                     | 0.48        | 0.99       | 1.96         |
| baseline.HTN                                      | 0.34        | 0.61       | 1.07         |
| baseline.Lung.Disease                             | 0.15        | 0.62       | 1.43         |
| baseline.Heart.Disease                            | 0.20        | 0.52       | 0.99         |

**Supplementary Table 3.** Confidence interval of AUC (95%) based on 1000 bootstrap iterations.

| <b>Severity</b>             | <b>2.50%</b> | <b>50%</b> | <b>97.50%</b> |
|-----------------------------|--------------|------------|---------------|
| Age + BMI                   | 0.539        | 0.587      | 0.598         |
| Age + BMI + Nausea          | 0.567        | 0.608      | 0.619         |
| Age + BMI + Vomiting        | 0.558        | 0.607      | 0.618         |
| Age + BMI + Diarrhea        | 0.574        | 0.630      | 0.651         |
| Age + BMI + Any GI symptoms | 0.605        | 0.640      | 0.651         |

| <b>Mortality</b>            | <b>2.50%</b> | <b>50%</b> | <b>97.50%</b> |
|-----------------------------|--------------|------------|---------------|
| Age + BMI                   | 0.685        | 0.700      | 0.702         |
| Age + BMI + Nausea          | 0.698        | 0.717      | 0.722         |
| Age + BMI + Vomiting        | 0.702        | 0.719      | 0.724         |
| Age + BMI + Diarrhea        | 0.697        | 0.718      | 0.726         |
| Age + BMI + Any GI symptoms | 0.708        | 0.727      | 0.736         |

| <b>ICU admission</b>        | <b>2.50%</b> | <b>50%</b> | <b>97.50%</b> |
|-----------------------------|--------------|------------|---------------|
| Age + BMI                   | 0.534        | 0.560      | 0.599         |
| Age + BMI + Nausea          | 0.496        | 0.523      | 0.650         |
| Age + BMI + Vomiting        | 0.488        | 0.515      | 0.626         |
| Age + BMI + Diarrhea        | 0.562        | 0.649      | 0.667         |
| Age + BMI + Any GI symptoms | 0.570        | 0.647      | 0.670         |

**Supplementary Table 4.** IL-6, IL-8, TNF- $\alpha$ , and IL-1 $\beta$  concentrations on admission in patients with and without GI symptoms. Benjamini adjusted p-values (signed - log<sub>10</sub> scale) from t-test are reported. Association passing a 10% FDR are highlighted in yellow.

|               | Nausea | Vomiting | Diarrhea | Any GI Symptoms |
|---------------|--------|----------|----------|-----------------|
| IL-6          | -1.958 | -0.473   | -2.226   | -2.484          |
| IL-8          | -4.098 | -1.440   | -2.302   | -3.133          |
| TNF- $\alpha$ | -0.815 | -0.311   | -0.406   | -0.864          |
| IL-1 $\beta$  | -0.295 | -0.473   | -0.295   | -0.295          |

**Supplementary Table 5:** Cluster assignment for each of the 92 Olink analytes.

| Marker    | Cluster |
|-----------|---------|
| IL8       | 1       |
| AXIN1     | 1       |
| OSM       | 1       |
| CCL4      | 1       |
| TGF.alpha | 1       |
| TNFSF14   | 1       |
| HGF       | 1       |
| SIRT2     | 1       |
| EN.RAGE   | 1       |
| CASP.8    | 1       |
| TWEAK     | 1       |
| STAMBP    | 1       |
| VEGFA     | 2       |
| CDCP1     | 2       |
| IL.17C    | 2       |
| CXCL9     | 2       |
| CST5      | 2       |
| FGF.23    | 2       |
| FGF.5     | 2       |
| LIF.R     | 2       |
| FGF.21    | 2       |
| IL.15RA   | 2       |
| IL.10RB   | 2       |
| PD.L1     | 2       |
| MMP.10    | 2       |
| TNF       | 2       |
| CD5       | 2       |
| X4E.BP1   | 2       |
| CD40      | 2       |
| CCL25     | 2       |
| CX3CL1    | 2       |
| TNFRSF9   | 2       |
| CSF.1     | 2       |
| CD8A      | 3       |
| CD244     | 3       |
| TRAIL     | 3       |
| CD6       | 3       |
| SCF       | 3       |
| CCL11     | 3       |
| CCL19     | 3       |
| TRANCE    | 3       |
| IL.12B    | 3       |
| CCL3      | 3       |
| Fit3L     | 3       |
| DNER      | 3       |
| IFN.gamma | 3       |
| FGF.19    | 3       |
| MCP.2     | 3       |
| TNFB      | 3       |

| Marker         | Cluster |
|----------------|---------|
| MCP.3          | 4       |
| OPG            | 4       |
| uPA            | 4       |
| IL6            | 4       |
| MCP.1          | 4       |
| IL18           | 4       |
| IL.18R1        | 4       |
| IL10           | 4       |
| CCL23          | 4       |
| CXCL10         | 4       |
| LIF            | 4       |
| CCL20          | 4       |
| ADA            | 4       |
| GDNF           | 5       |
| IL.17A         | 5       |
| IL.20RA        | 5       |
| IL.2RB         | 5       |
| IL.1.alpha     | 5       |
| IL2            | 5       |
| TSLP           | 5       |
| SLAMF1         | 5       |
| IL.10RA        | 5       |
| IL.22.RA1      | 5       |
| Beta.NGF       | 5       |
| IL.24          | 5       |
| IL13           | 5       |
| ARTN           | 5       |
| IL.20          | 5       |
| CCL28          | 5       |
| IL33           | 5       |
| IL4            | 5       |
| NRTN           | 5       |
| NT.3           | 5       |
| IL5            | 5       |
| IL7            | 6       |
| LAP.TGF.beta.1 | 6       |
| CXCL11         | 6       |
| CXCL1          | 6       |
| MCP.4          | 6       |
| MMP.1          | 6       |
| CXCL5          | 6       |
| CXCL6          | 6       |
| ST1A1          | 6       |

**Supplementary Table 6:** Olink analytes in patients with and without GI symptoms. P-values from t-test comparing patients with and without GI symptoms. Signed Benjamini-Hochberg adjusted p-value (-log<sub>10</sub> scale) are reported.

|                | Any GI Symptoms | Nausea | Vomiting | Diarrhea |
|----------------|-----------------|--------|----------|----------|
| IL8            | -1.315          | -0.654 | -1.345   | -1.562   |
| VEGFA          | 0.006           | 0.014  | -0.356   | -0.027   |
| CD8A           | -0.823          | -0.175 | 0.193    | -0.823   |
| MCP.3          | -0.524          | -1.437 | -0.422   | -0.254   |
| GDNF           | -1.355          | -1.345 | -0.014   | -1.490   |
| CDGP1          | -0.449          | -0.309 | -0.175   | -0.524   |
| CD244          | -0.023          | 0.110  | 0.126    | -0.017   |
| IL7            | 1.345           | 0.175  | -0.123   | 1.345    |
| OPG            | -2.183          | -1.209 | -0.014   | -2.183   |
| LAP.TGF.beta.1 | 0.356           | -0.006 | -0.626   | 0.407    |
| uPA            | -0.156          | -0.009 | 0.126    | -0.385   |
| IL6            | -1.063          | -1.022 | -0.254   | -0.747   |
| IL.17C         | -1.209          | -0.287 | -0.023   | -1.455   |
| MCP.1          | -0.175          | -0.654 | -0.458   | -0.187   |
| IL.17A         | -2.183          | -1.097 | -1.419   | -2.183   |
| CXCL11         | 0.058           | -0.195 | -0.004   | 0.027    |
| AXIN1          | -0.009          | -0.031 | -1.209   | -0.026   |
| TRAIL          | 1.063           | 0.626  | 0.314    | 0.458    |
| IL.20RA        | -0.548          | -0.573 | -0.563   | -0.618   |
| CXCL9          | -0.573          | -0.367 | 0.023    | -1.209   |
| CST5           | -0.626          | -0.187 | -0.004   | -0.969   |
| IL.2RB         | -0.156          | -0.028 | 0.009    | -0.044   |
| IL.1.alpha     | 0.046           | -0.023 | 0.001    | 0.162    |
| OSM            | -0.178          | -0.117 | -0.175   | -0.242   |
| IL2            | -0.341          | -0.424 | -0.287   | -0.264   |
| CXCL1          | -0.058          | -0.533 | -0.733   | -0.164   |
| TSLP           | 0.009           | 0.001  | -0.031   | -0.009   |
| CCL4           | -0.287          | -0.022 | 0.022    | -1.355   |
| CD6            | -0.001          | 0.027  | 0.363    | 0.001    |
| SCF            | -0.245          | -0.022 | -0.114   | -0.082   |
| IL18           | -0.254          | -0.068 | 0.332    | -0.434   |
| SLAMF1         | -0.618          | -0.707 | -0.190   | -0.708   |
| TGF.alpha      | -1.087          | -0.626 | -0.675   | -1.345   |
| MCP.4          | 0.191           | -0.175 | -0.461   | 0.058    |
| CCL11          | -0.327          | -0.440 | -1.209   | -0.260   |
| TNFSF14        | 0.014           | -0.014 | -0.434   | -0.012   |
| FGF.23         | -0.556          | -0.058 | 0.036    | -1.209   |
| IL.10RA        | 0.027           | 0.218  | -0.044   | -0.026   |
| FGF.5          | -0.823          | -0.164 | -0.027   | -1.365   |
| MMP.1          | 0.110           | 0.156  | -0.218   | 0.027    |
| LIF.R          | -0.347          | -0.009 | 0.310    | -0.358   |
| FGF.21         | -0.495          | -0.003 | 0.056    | -0.880   |
| CCL19          | -0.044          | -0.227 | -0.156   | -0.175   |
| IL.15RA        | -1.345          | -0.175 | 0.022    | -2.177   |
| IL.10RB        | -1.355          | -0.389 | -0.079   | -2.183   |
| IL.22.RA1      | -0.073          | -0.022 | -0.009   | -0.254   |
| IL.18R1        | -0.208          | -0.054 | 0.175    | -0.156   |
| PD.L1          | -0.441          | -0.195 | 0.031    | -0.702   |
| Beta.NGF       | -0.573          | -0.458 | -0.022   | -0.495   |
| CXCL5          | -0.014          | -0.144 | -0.424   | -0.042   |
| TRANCE         | 0.933           | 0.458  | 0.236    | 0.654    |
| HGF            | -0.626          | -0.333 | -0.009   | -0.529   |
| IL.12B         | 0.060           | 0.058  | -0.009   | 0.038    |
| IL.24          | -0.536          | -0.218 | 0.023    | -0.618   |
| IL13           | -0.007          | 0.075  | 0.068    | -0.126   |
| ARTN           | -1.209          | -1.365 | -0.618   | -1.345   |
| MMP.10         | -1.562          | -0.967 | -0.156   | -2.073   |
| IL10           | -0.379          | -0.377 | 0.058    | -0.270   |
| TNF            | -0.643          | -0.175 | -0.027   | -0.932   |



|           |        |        |        |        |
|-----------|--------|--------|--------|--------|
| CCL23     | -0.023 | -0.218 | 0.001  | 0.001  |
| CD5       | -0.823 | -0.357 | -0.036 | -0.933 |
| CCL3      | -0.933 | -0.553 | -0.576 | -1.490 |
| Flt3L     | 0.031  | -0.009 | -0.377 | -0.009 |
| CXCL6     | -0.156 | -0.385 | -0.347 | -0.385 |
| CXCL10    | -0.001 | -0.441 | -0.012 | 0.031  |
| X4E.BP1   | -0.733 | -0.211 | 0.064  | -1.223 |
| IL.20     | -0.247 | -1.022 | -0.270 | -0.195 |
| SIRT2     | -0.123 | -0.164 | -0.332 | -0.162 |
| CCL28     | -2.183 | -2.183 | -0.737 | -2.183 |
| DNER      | 0.175  | 0.317  | 0.332  | 0.202  |
| EN.RAGE   | -0.357 | -0.193 | -0.166 | -0.526 |
| CD40      | -0.823 | -0.079 | 0.001  | -1.490 |
| IL33      | -0.236 | -0.164 | 0.023  | -0.287 |
| IFN.gamma | 0.218  | 0.044  | 0.175  | 0.270  |
| FGF.19    | -0.458 | -0.001 | -0.036 | -1.355 |
| IL4       | -0.020 | -0.175 | -0.027 | -0.009 |
| LIF       | -1.345 | -0.526 | -0.573 | -1.355 |
| NRTN      | 0.001  | -0.168 | -0.036 | -0.012 |
| MCP.2     | 0.319  | -0.327 | -0.036 | 1.231  |
| CASP.8    | -0.438 | -0.377 | -0.264 | -0.731 |
| CCL25     | -0.264 | 0.025  | -0.075 | -0.626 |
| CX3CL1    | -0.556 | -0.164 | -0.009 | -0.810 |
| TNFRSF9   | -1.345 | -0.175 | -0.012 | -2.029 |
| NT.3      | -0.012 | -0.363 | 0.009  | -0.122 |
| TWEAK     | -0.014 | 0.014  | -0.113 | -0.012 |
| CCL20     | -0.737 | -0.576 | 0.187  | -0.823 |
| ST1A1     | 0.156  | -0.025 | -0.175 | 0.068  |
| STAMPB    | -0.201 | -0.171 | -0.175 | -0.377 |
| IL5       | 0.156  | -0.009 | 0.156  | -0.009 |
| ADA       | -0.259 | -0.270 | 0.175  | -0.434 |
| TNFB      | 0.009  | -0.009 | -0.036 | 0.014  |
| CSF.1     | -0.458 | -0.028 | 0.012  | -0.450 |

**Supplementary Table 7.** Clinical characteristics of all SARS-CoV-2 uninfected controls patients who underwent endoscopic biopsies of the GI tract.

| <b>Control #</b> | <b>Age*</b> | <b>Sex</b> | <b>Days between negative NP SARS-CoV-2 swab and Procedure</b> | <b>Procedure</b>  | <b>Tissue sample location</b> |
|------------------|-------------|------------|---------------------------------------------------------------|-------------------|-------------------------------|
| 1                | 70-75       | F          | 1                                                             | EGD               | Duodenum                      |
| 2                | 60-65       | F          | 1                                                             | EGD               | Duodenum                      |
| 3                | 65-70       | M          | 2                                                             | EGD & colonoscopy | Duodenum                      |
| 4                | 40-45       | M          | 1                                                             | EGD               | Duodenum                      |
| 5                | 65-70       | M          | 1                                                             | EGD               | Duodenum                      |
| 6                | 70-75       | M          | 1                                                             | EGD               | Duodenum                      |
| 7                | 65-70       | F          | 1                                                             | EGD               | Duodenum                      |
| 8                | 70-75       | F          | 2                                                             | EGD               | Duodenum                      |
| 9                | 50-55       | M          | 1                                                             | EGD               | Duodenum                      |
| 10               | 75-80       | F          | 1                                                             | Colonoscopy       | Ileum                         |

\* Age is provided as a range to obscure identifying information related to individuals

Abbreviations: EGD = Esophagogastroduodenoscopy, F = Female, M = Male

**Supplementary Table 8.** Clinical characteristics of COVID-19 patients including their symptoms on presentation, co-morbidities and treatment regimens.

| Patient # | Clinical setting   | Symptoms on presentation                                | Other symptoms / findings / complications   | Highest level of oxygen required | COVID-19 Treatments                                                 |
|-----------|--------------------|---------------------------------------------------------|---------------------------------------------|----------------------------------|---------------------------------------------------------------------|
| 1         | Inpatient -ICU     | CVA                                                     | Pneumonia on imaging                        | Mechanical ventilation           | HCQ and azithromycin                                                |
| 2         | Inpatient -ICU     | Fever, shortness of breath, vomiting and diarrhea       |                                             | Room air                         | HCQ (given prior to admission at MSH) and steroids                  |
| 3         | Inpatient -non-ICU | Diarrhea and altered mental status                      | UTI, choledocholithiasis                    | Room air                         | Supportive care                                                     |
| 4         | Inpatient -ICU     | Fever, cough, shortness of breath, abdominal pain       | Cardiac arrest                              | Mechanical ventilation           | HCQ, azithromycin, Remdesivir and therapeutic AC                    |
| 5         | Inpatient -non-ICU | Fever, nausea, vomiting and shortens of breath          |                                             | HFNC                             | Steroids and therapeutic AC                                         |
| 6         | Outpatient         | Asymptomatic at time of procedure, tested for procedure | Subsequently developed CVA                  | Room air                         | Therapeutic AC                                                      |
| 7         | Inpatient -non-ICU | Asymptomatic at time of procedure, tested for procedure | Dysphagia                                   | Room air                         | Supportive care                                                     |
| 8         | Inpatient -ICU     | Shortness of breath, altered mental status              | UTI, bacteremia                             | HFNC                             | HCQ, steroids, therapeutic AC                                       |
| 9         | Inpatient -ICU     | Shortness of breath                                     |                                             | Mechanical ventilation           | HCQ, azithromycin, steroids, therapeutic AC and convalescent plasma |
| 10        | NA                 | NA                                                      | NA                                          | NA                               | NA                                                                  |
| 11        | Inpatient -non-ICU | Shortness of breath, altered mental status              | acute on chronic renal failure requiring HD | HFNC / BiPAP                     | HCQ, azithromycin, and steroids                                     |
| 12        | Outpatient         | Fatigue, myalgias, cough                                |                                             | Room air                         | Supportive care                                                     |
| 13        | Outpatient         | Chills, fever                                           | Epigastric pain radiating to back           | Room air                         | Supportive care                                                     |
| 14        | Inpatient -ICU     | Shortness of breath, generalized weakness               |                                             | Mechanical ventilation           | HCQ, azithromycin, steroids, therapeutic AC, convalescent plasma    |
| 15        | Inpatient -non-ICU | Shortness of breath, abdominal pain                     |                                             | Room air                         | Supportive care                                                     |
| 16        | Outpatient         | Myalgias                                                | Obstructive jaundice                        | Room air                         | Supportive care                                                     |
| 17        | Outpatient         | Asymptomatic at time of procedure, tested for procedure |                                             | Room air                         | Supportive care                                                     |
| 18        | Inpatient -non-ICU | Abdominal pain                                          | Jaundice, UTI                               | Room air                         | Supportive care                                                     |

Abbreviations: CVA = cerebrovascular accident, DM = diabetes mellitus, HCQ = hydroxychloroquine, HIV = human immunodeficiency virus, UTI = urinary tract infection, HFNC = high flow nasal cannula, MS = multiple sclerosis, CAD = coronary artery disease, HTN = Hypertension, Afib = atrial fibrillation, ESRD = end-stage renal disease, COPD = chronic obstructive pulmonary disease

**Supplementary Table 9.** Histopathological characteristics of COVID-19 cases.

| Patient # | Tissue used for IF | Viral protein detected by IF? | Increased IELs | Neutrophils          | Other histopathologic abnormalities                                  | Viral particles detected on EM? | Other potential reasons for inflammation         |
|-----------|--------------------|-------------------------------|----------------|----------------------|----------------------------------------------------------------------|---------------------------------|--------------------------------------------------|
| 2         | Duodenum, ileum    | yes (ileum and duodenum)      | no             | yes (ileum)          | inflammation in ileum                                                | not done                        | transplant rejection (s/p intestinal transplant) |
| 3         | None available     | N/A                           | yes (duodenum) | yes (mild, duodenum) | none                                                                 | yes                             | HIV                                              |
| 4         | Duodenum           | yes                           | borderline     | no                   | none                                                                 | yes                             | none                                             |
| 5         | None available     | N/A                           | no             | no                   | epithelial damage, villous blunting and reactive foveolar metaplasia | no                              | none                                             |
| 6         | Duodenum           | yes                           | no             | yes                  | epithelial damage and foveolar metaplasia                            | no                              | Invasive adenocarcinoma in the duodenum          |
| 7         | Duodenum           | yes                           | yes            | yes (mild)           | none                                                                 | not done                        | esophageal cancer                                |
| 8         | None available     | N/A                           | borderline     | yes (mild)           | none                                                                 | no                              | none                                             |
| 9         | Duodenum           | yes                           | borderline     | yes (mild)           | epithelial damage                                                    | yes                             | none                                             |
| 11        | None available     | N/A                           | no             | no                   | none                                                                 | yes                             | none                                             |
| 12        | Ileum              | yes                           | no             | no                   | none                                                                 | yes                             | none                                             |
| 13        | Duodenum           | no                            | borderline     | no                   | none                                                                 | yes                             | stage IV pancreatic cancer                       |
| 15        | Duodenum           | yes                           | borderline     | no                   | none                                                                 | no                              | choledocholithiasis                              |
| 16        | Duodenum           | yes                           | no             | no                   | none                                                                 | no                              | biliary stricture                                |
| 17        | Duodenum           | yes                           | no             | no                   | none                                                                 | no                              | none                                             |
| 18        | Duodenum           | yes                           | patchy         | yes (mild)           | none                                                                 | no                              | Biliary stricture c/f cholangiocarcinoma         |

Histologic information in reference to tissue used for IF unless otherwise indicated

**Supplementary Table 10.** Histopathological characteristics of pre-pandemic controls.

| Patient | Age*  | Sex | Tissue for IF      | Reason for procedure   | Medications                                                                                                                                                                 |
|---------|-------|-----|--------------------|------------------------|-----------------------------------------------------------------------------------------------------------------------------------------------------------------------------|
| 1       | 50-55 | M   | duodenum           | epigastric pain        | famotidine, ranitidine, azelastine-fluticasone, ipratropium bromide, levocetirizine, azelastine, omeprazole                                                                 |
| 2       | 65-70 | F   | duodenum and ileum | abdominal pain         | none                                                                                                                                                                        |
| 3       | 80-85 | F   | duodenum           | dysphagia              | fluticasone-salmeterol, guaifenesin, albuterol, sennosides, Montelukast, losartan, amlodipine, acetaminophen, glipizide, atenolol, atorvastatin                             |
| 4       | 75-80 | F   | duodenum           | abdominal pain         | losartan, aspirin, ferrous sulfate, metformin, omeprazole, pravastatin                                                                                                      |
| 5       | 75-80 | F   | duodenum           | weight loss            | spironolactone, apixaban, folic acid, torsemide, fluticasone                                                                                                                |
| 6       | 30-35 | M   | ileum              | iron deficiency anemia | metformin, hydrochlorothiazide, enalapril                                                                                                                                   |
| 7       | 55-60 | M   | ileum              | abdominal pain         | divalproex, atorvastatin, benazepril, carvedilol, linagliptin, ondansetron, lamotrigine, lithium, rabeprazole, risperidone, alprazolam, oxycodone, glimepiride, allopurinol |
| 8       | 4-45  | M   | ileum              | rectal bleeding        | none                                                                                                                                                                        |
| 9       | 50-55 | F   | ileum              | CRC screening          | acyclovir, acetaminophen                                                                                                                                                    |
| 10      | 20-25 | F   | ileum              | abdominal pain         | none                                                                                                                                                                        |

GERD, gastroesophageal reflux disease; HLD, hyperlipidemia; MVP, mitral valve prolapse; DM2, diabetes mellitus type 2; OA, osteoarthritis; HTN, hypertension; COPD, chronic obstructive pulmonary disease; CAD, coronary artery disease; Afib, atrial fibrillation; CHF, congestive heart failure; OSA, obstructive sleep apnea; IBS, irritable bowel syndrome.

\* Age is provided as a range to obscure identifying information related to individuals

**Supplementary Table 11.** List of antibodies used for microscopy studies.

| Antigen                                | Clone      | Vendor  | Catalogue number | Host   | Conjugation     | Dilution |
|----------------------------------------|------------|---------|------------------|--------|-----------------|----------|
| ACE2                                   | Polyclonal | Abcam   | ab15348          | rabbit | Unconjugated    | 1:1000   |
| EPCAM                                  | SPM491     | GeneTex | GTX34693         | mouse  | Unconjugated    | 1:100    |
| SARS-CoV-2 nucleocapsid                | Polyclonal | N/A*    | N/A              | rabbit | Unconjugated    | 1:2000   |
| No known specificity (isotype control) | Polyclonal | Abcam   | ab37415          | rabbit | Unconjugated    | variable |
| Yeast GAL4 (isotype control)           | 15-6E10A7  | Abcam   | ab170190         | mouse  | Unconjugated    | variable |
| Mouse IgG H&L                          | Polyclonal | Abcam   | ab150116         | goat   | Alexa Fluor 488 | 1:1000   |
| Rabbit IgG H&L                         | Polyclonal | Abcam   | ab150077         | goat   | Alexa Fluor 594 | 1:1000   |







## Supplementary Figure 1.

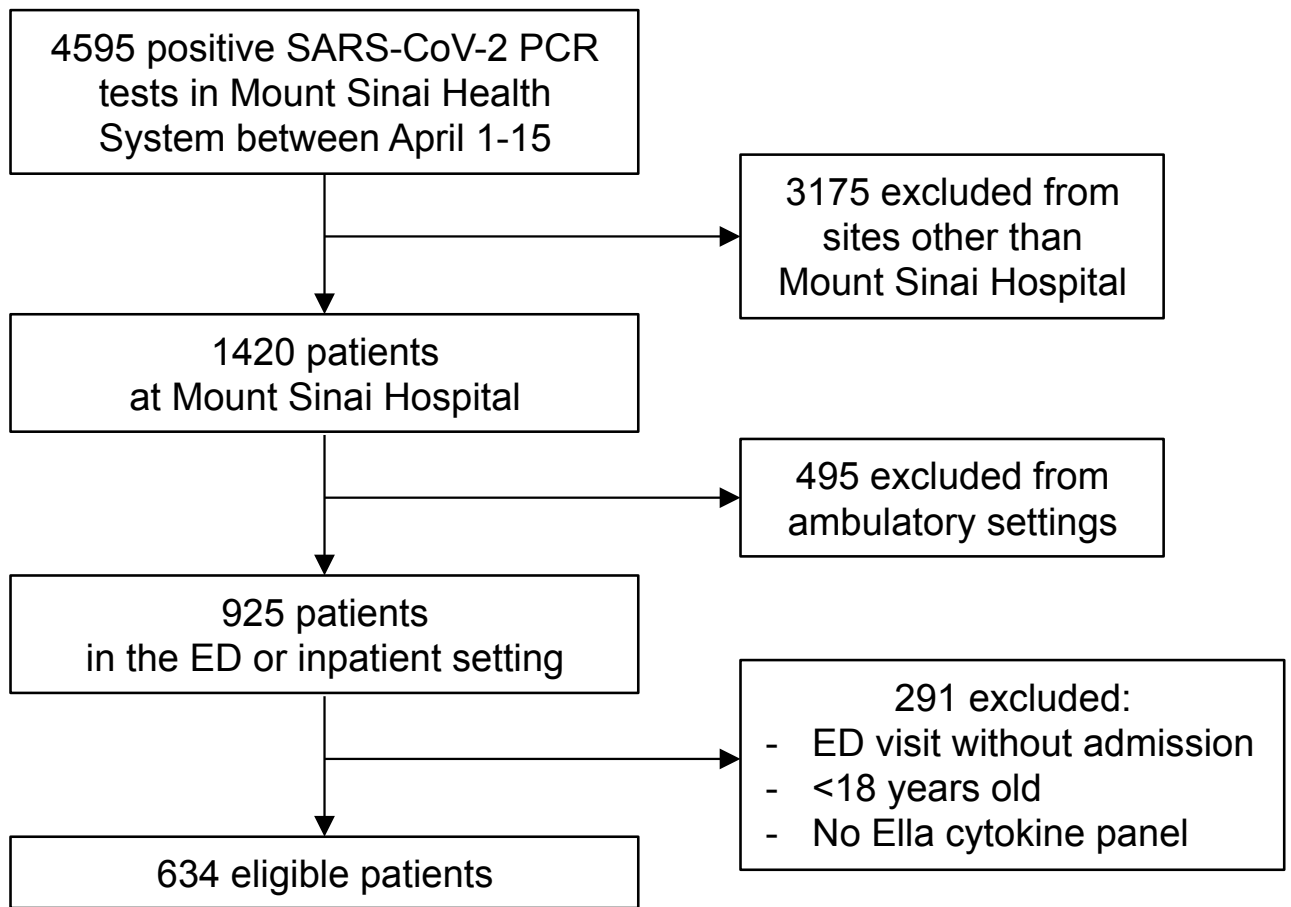

**Flow diagram of the discovery cohort.** The diagram shows the total number of patients with a positive SARS-CoV-2 nasopharyngeal swab in the Mount Sinai Health System between April 1-15, 2020 and the selection process that was adopted in order to select patients in the discovery cohort.

## Supplementary Figure 2.

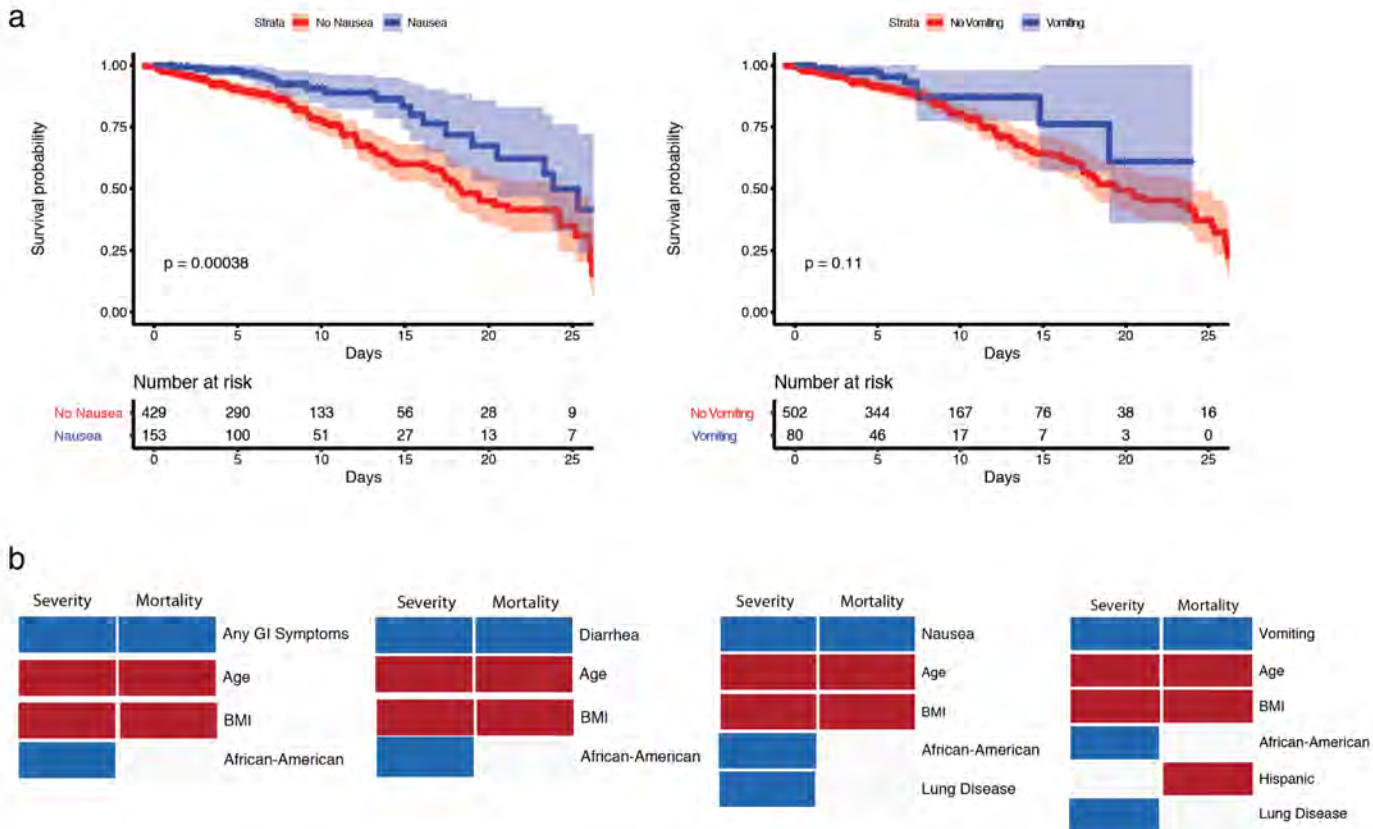

**GI symptoms associated with reduced mortality and severity.** **a**, Kaplan-Meier curves for mortality stratified by nausea (left panel) and vomiting (right panel) for patients in the discovery cohort. P-values from log-rank test and 95% confidence intervals of Kaplan-Meier curves are shown. Below each Kaplan-Meier, the number of patients at risk for different time points are reported. **b**, Significant variables associated with severity and mortality. Significant associations were derived via 95% confidence intervals based on 1000 bootstrap iterations. Negative associations are displayed in blue; while positive associations in red. Severity and mortality were modeled as function of any GI symptoms or an individual GI symptom (diarrhea, nausea, vomiting) and covariates including age, gender, race/ethnicity, BMI, hypertension, diabetes, lung and heart diseases.

# Supplementary Figure 3.

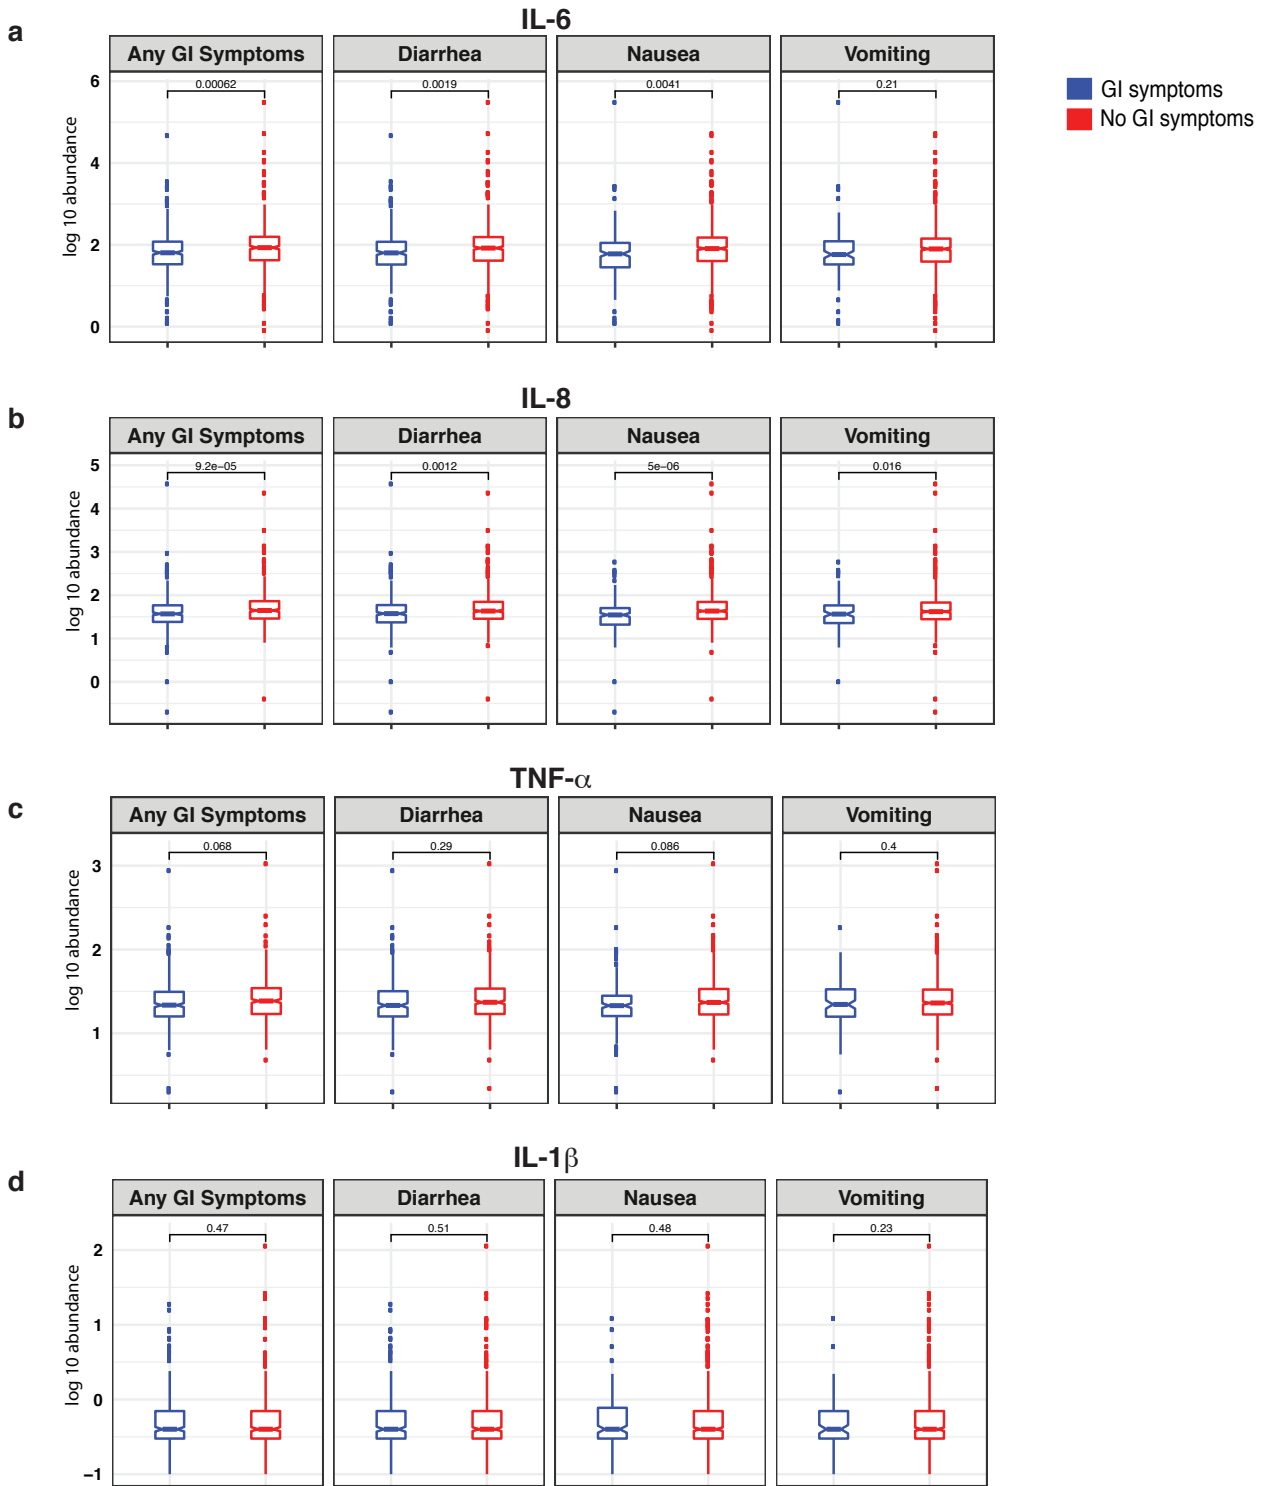

**COVID-19 patients with GI symptoms have reduced levels of circulating IL-6 and IL-8.** a, IL-6, b, IL-8, c, TNF- $\alpha$ , and d, IL-1 $\beta$  at the time of admission in patients with and without GI symptoms. Boxplots represent the median and interquartile range. P-values calculated using unpaired t-test.



## Supplementary Figure 5.

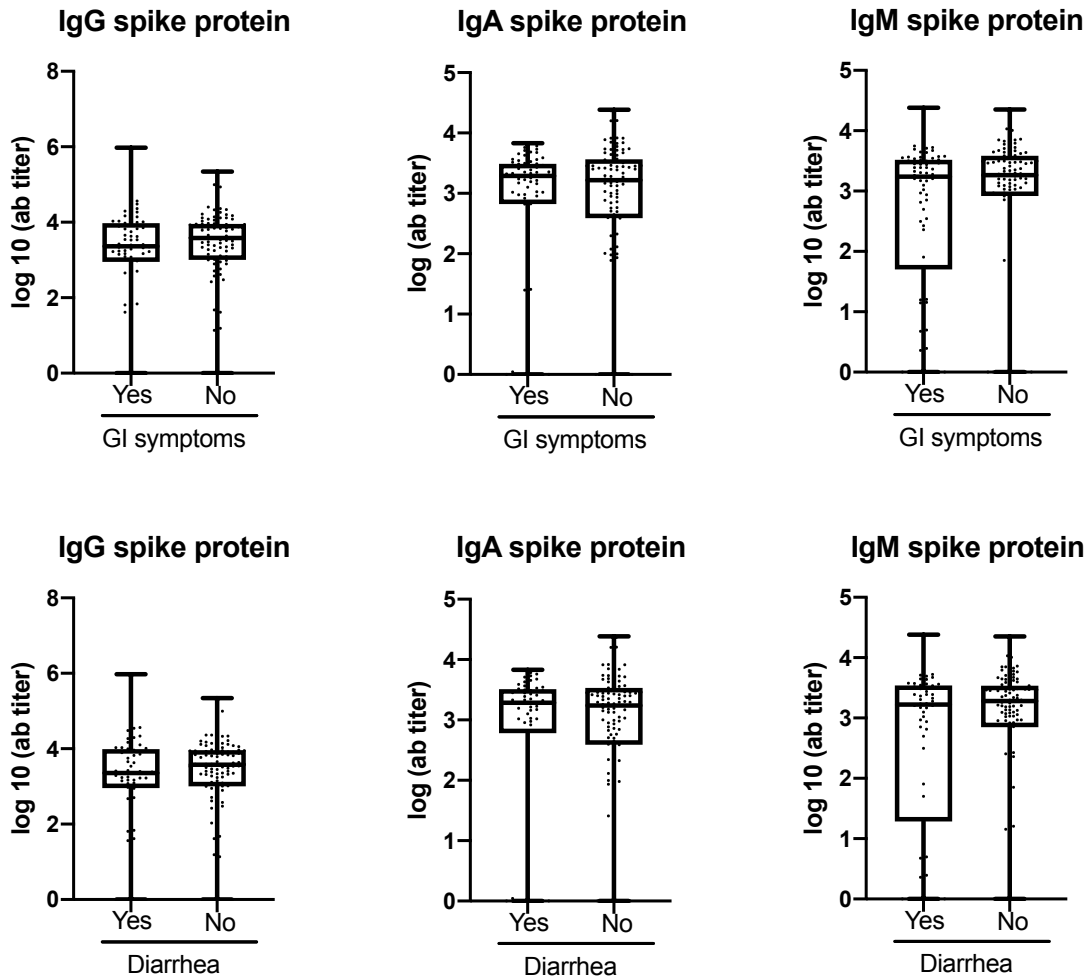

**Comparison of anti-spike immunoglobulin subsets.** Anti-spike protein IgG, IgA and IgM antibodies were compared between COVID-19 patients with any GI symptoms or not (top row) and, presence of diarrhea or not (bottom row). Mann-Whitney tests used to compare between the groups.

## Supplementary Figure 6.

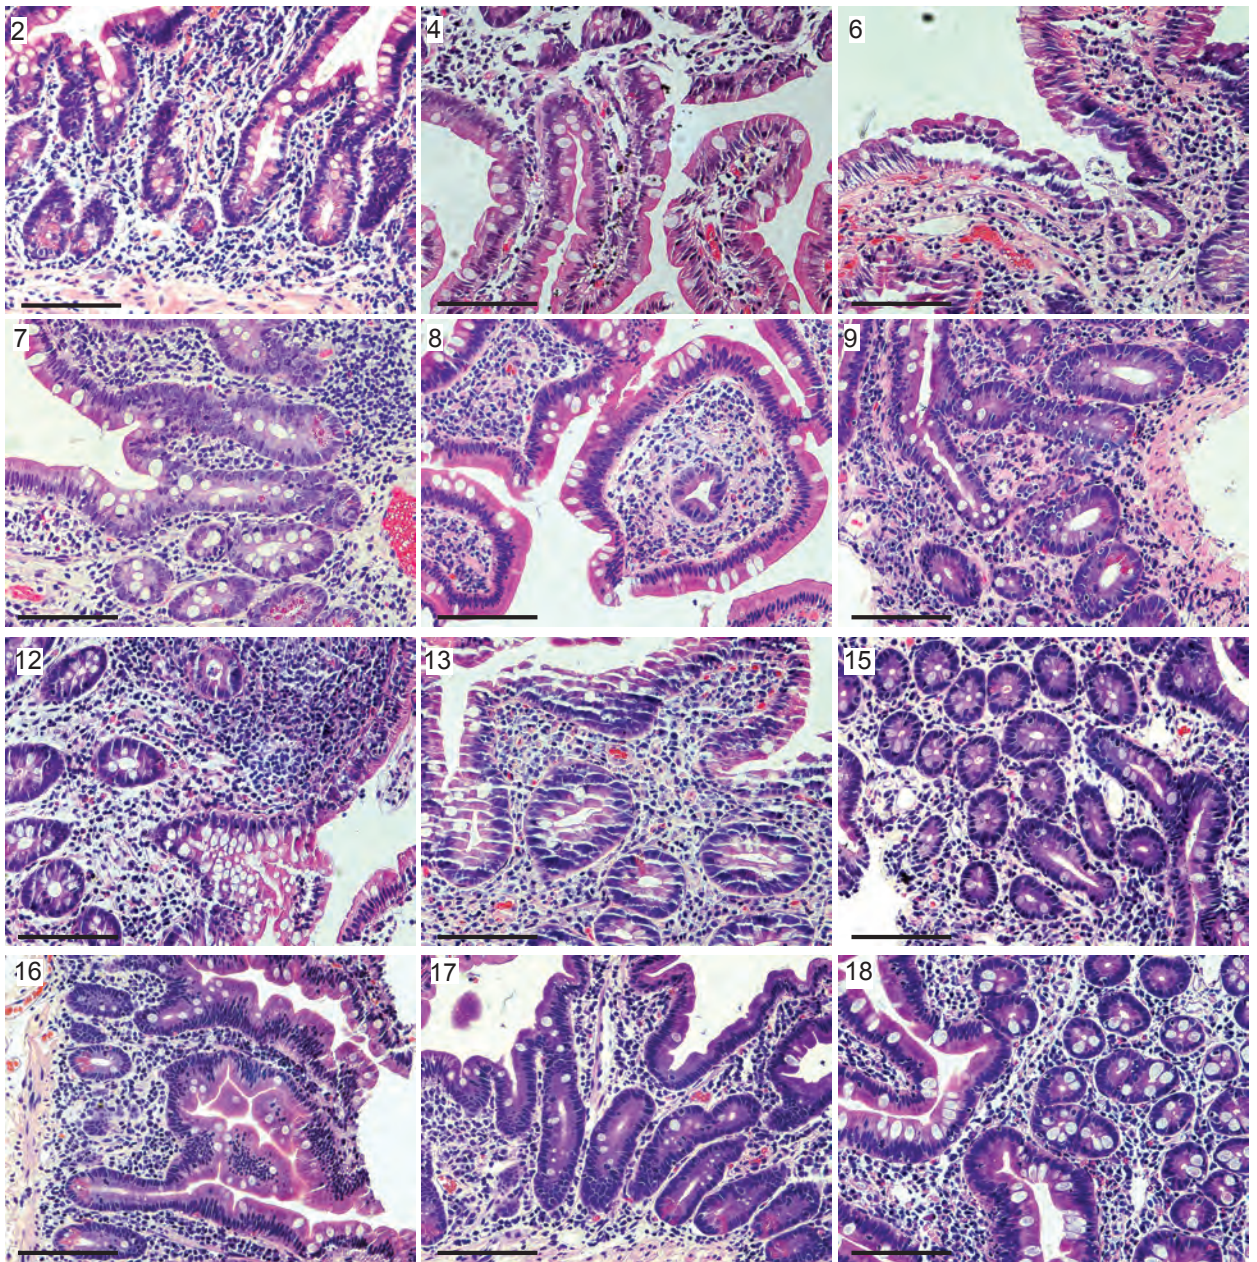

**Representative H&E staining of small intestinal biopsies of COVID-19 patients.** Patient number in the top left corner corresponds with the patient number in Supplementary Table 10. All biopsies are duodenal with the exception of patient 12 which is of terminal ileum. Scale bar; 100 $\mu$ m.

## Supplementary Figure 7.

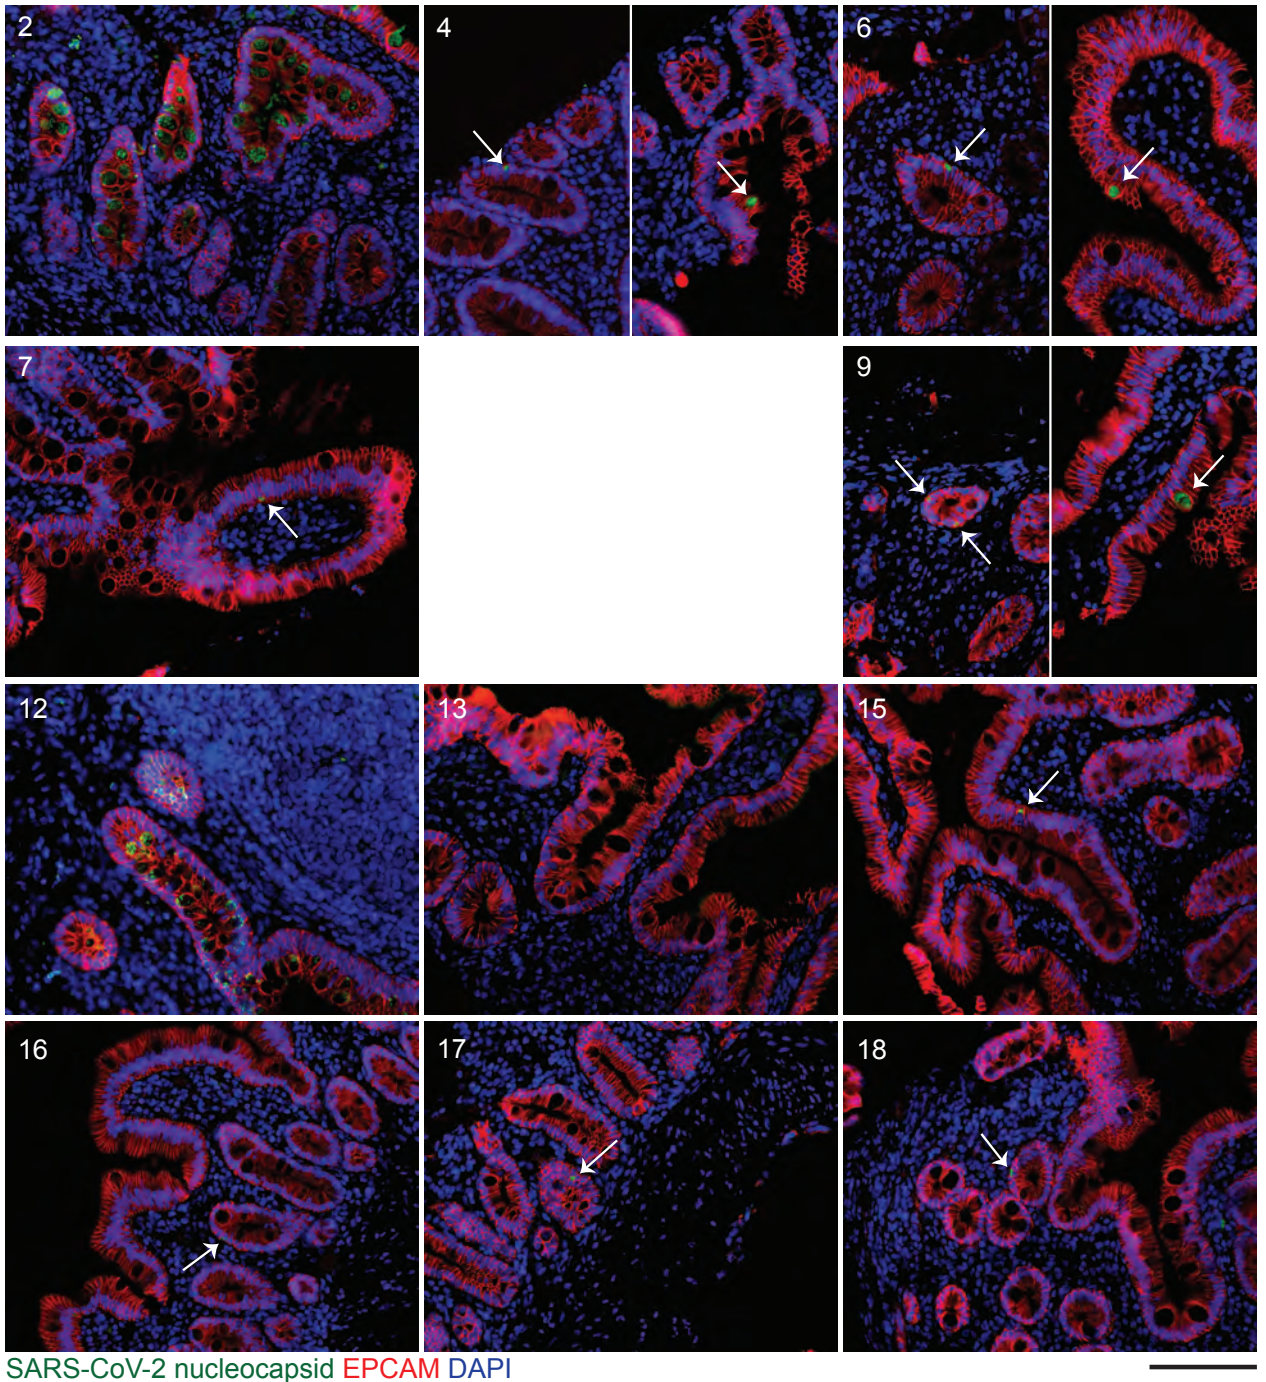

**Representative IF of small intestinal biopsies of COVID-19 patients.** SARS-CoV-2 nucleocapsid (green), EPCAM (red) and DAPI (blue) in all COVID-19 patients where tissue was available for IF. Patient number in the top right corner corresponds with the patient number in Supplementary Table 10. All biopsies are duodenal with the exception of patient 12 which is of terminal ileum. Patient 8 missing due to technical difficulties during IF staining. Scale bar; 100 $\mu$ m.

## Supplementary Figure 8.

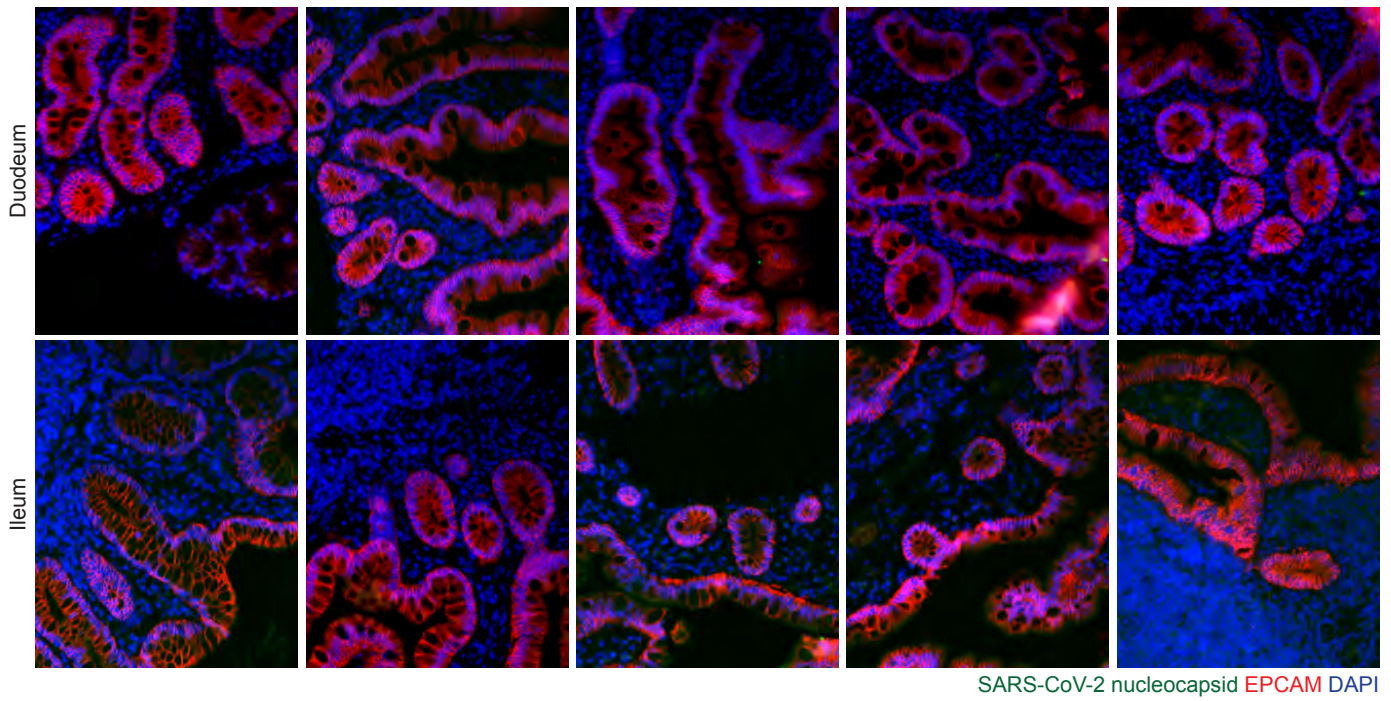

**Representative IF of small intestinal biopsies of control patients.** SARS-CoV-2 nucleocapsid (green), EPCAM (red) and DAPI (blue) in duodenal biopsies (upper) and ileal biopsies (lower). Scale bar; 100 $\mu$ m.



## Supplementary Figure 9.

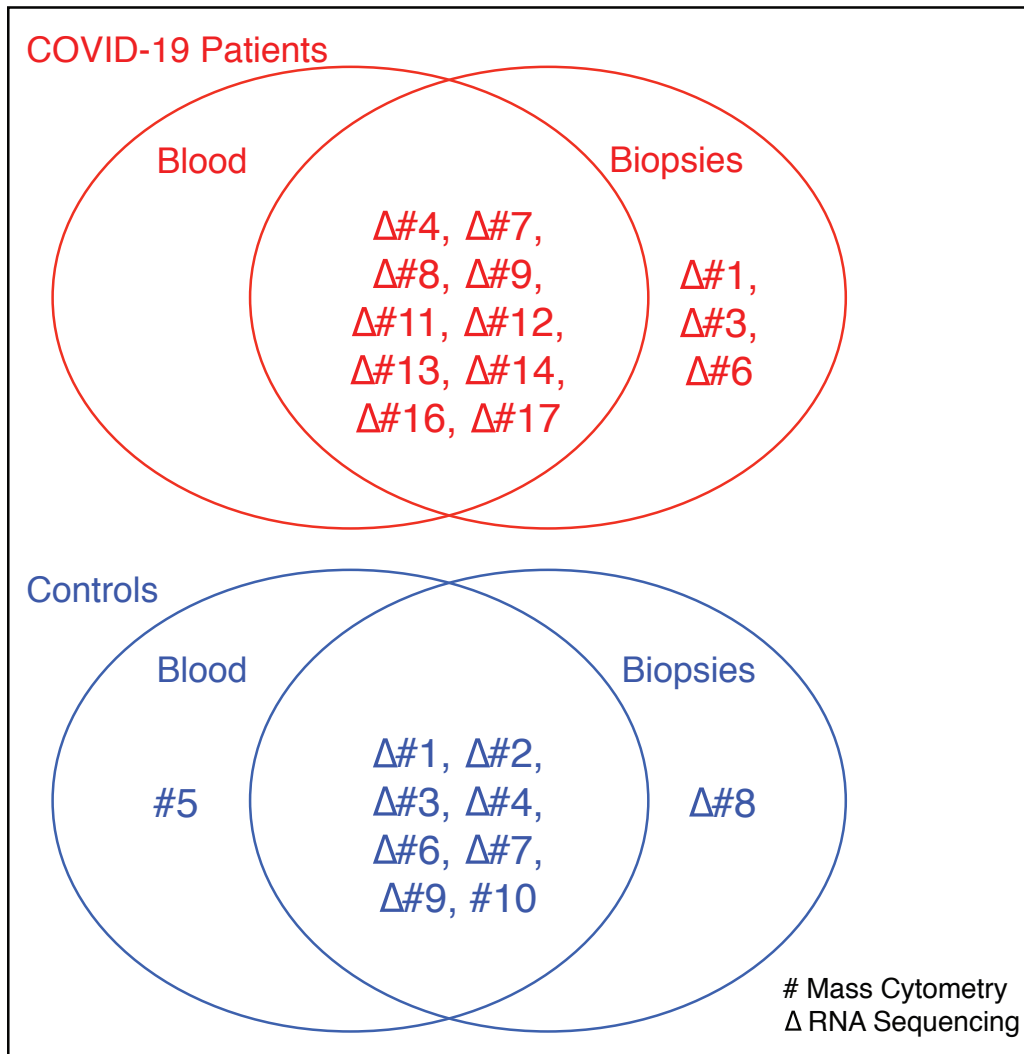

| Assays                | Sample | COVID-19 cases | Controls |
|-----------------------|--------|----------------|----------|
| <b>Mass Cytometry</b> | Biopsy | 13             | 9        |
|                       | Blood  | 10             | 9        |
| <b>RNA Sequencing</b> | Biopsy | 13             | 8        |
|                       | Blood  | N/A            | N/A      |

**Sample allocation for different assays in COVID-19 patients and controls.** Venn diagrams showing blood and biopsy samples used for mass cytometry (#) and RNA sequencing (Δ) in COVID-19 patients (red) and controls (blue). The numbers in the Venn diagrams refer to respective patient and control cases in Table 6 and Supplementary Table 7.

Table (below) summarizes the total number of blood and biopsy samples allocated for mass cytometry and RNA sequencing.

# Supplementary Figure 10.

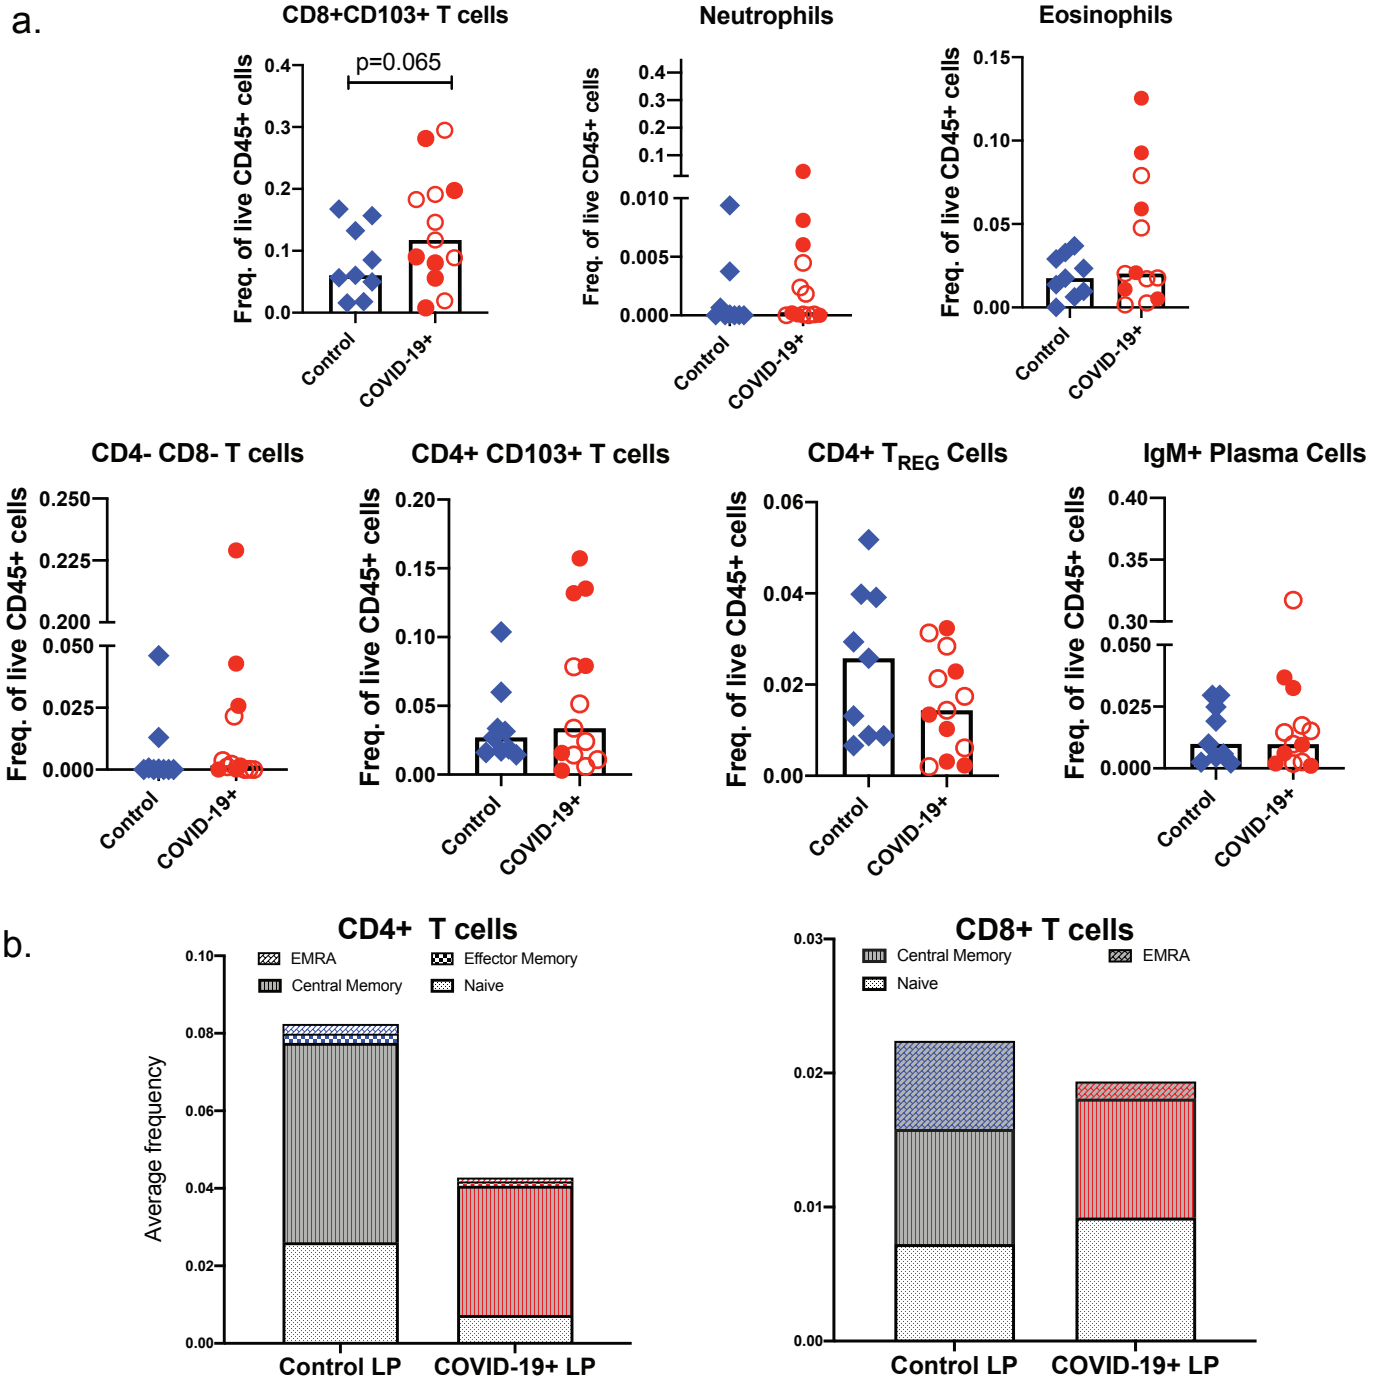

**Altered immune populations in the lamina propria of COVID-19 patients compared to controls.** **a**, The bar plots show the distribution of different immune cells in lamina propria of COVID-19 patients (red) and controls (blue). Open red circles denote patients with asymptomatic/mild/moderate disease while filled red circles denote patients with severe COVID-19. **b**, The stacked frequency bar graphs show the distribution of naïve and memory CD4+ and CD8+ T cells in the lamina propria of COVID-19 patients and controls.

# Supplementary Figure 11.

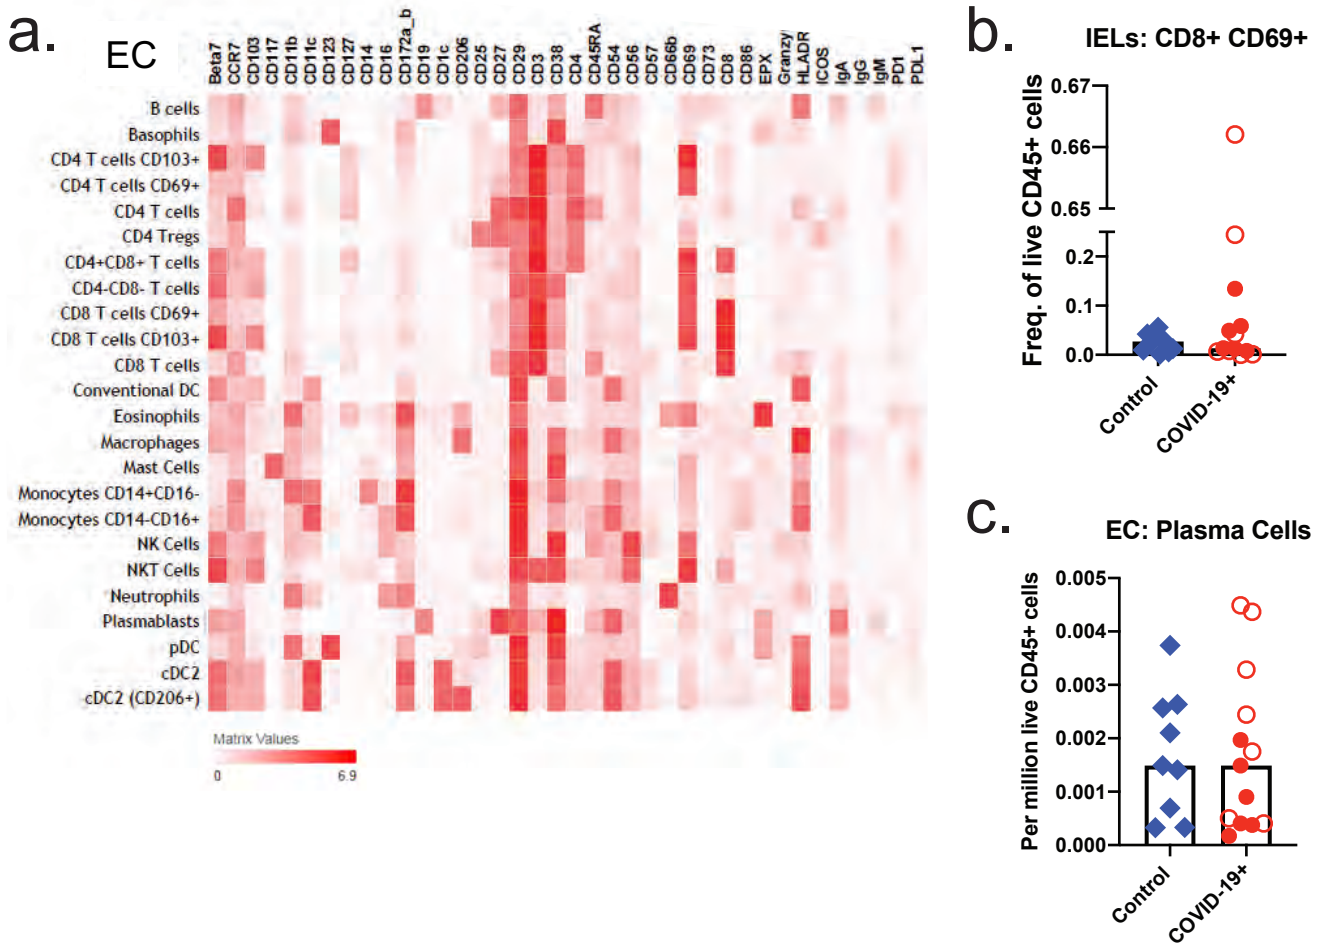

**Altered immune populations in the epithelial compartment of COVID-19 patients compared to controls.** **a**, The heat map shows clustering and distribution of different cell types in the epithelial compartment (EC). **b-c**, The bar plots show distribution of intraepithelial lymphocytes (IELs) (**b**) and plasma cells (**c**) in the EC of COVID-19 patients and controls. Open red circles denote patients with asymptomatic/mild/moderate disease while filled red circles denote patients with severe COVID-19.

# Supplementary Figure 12.

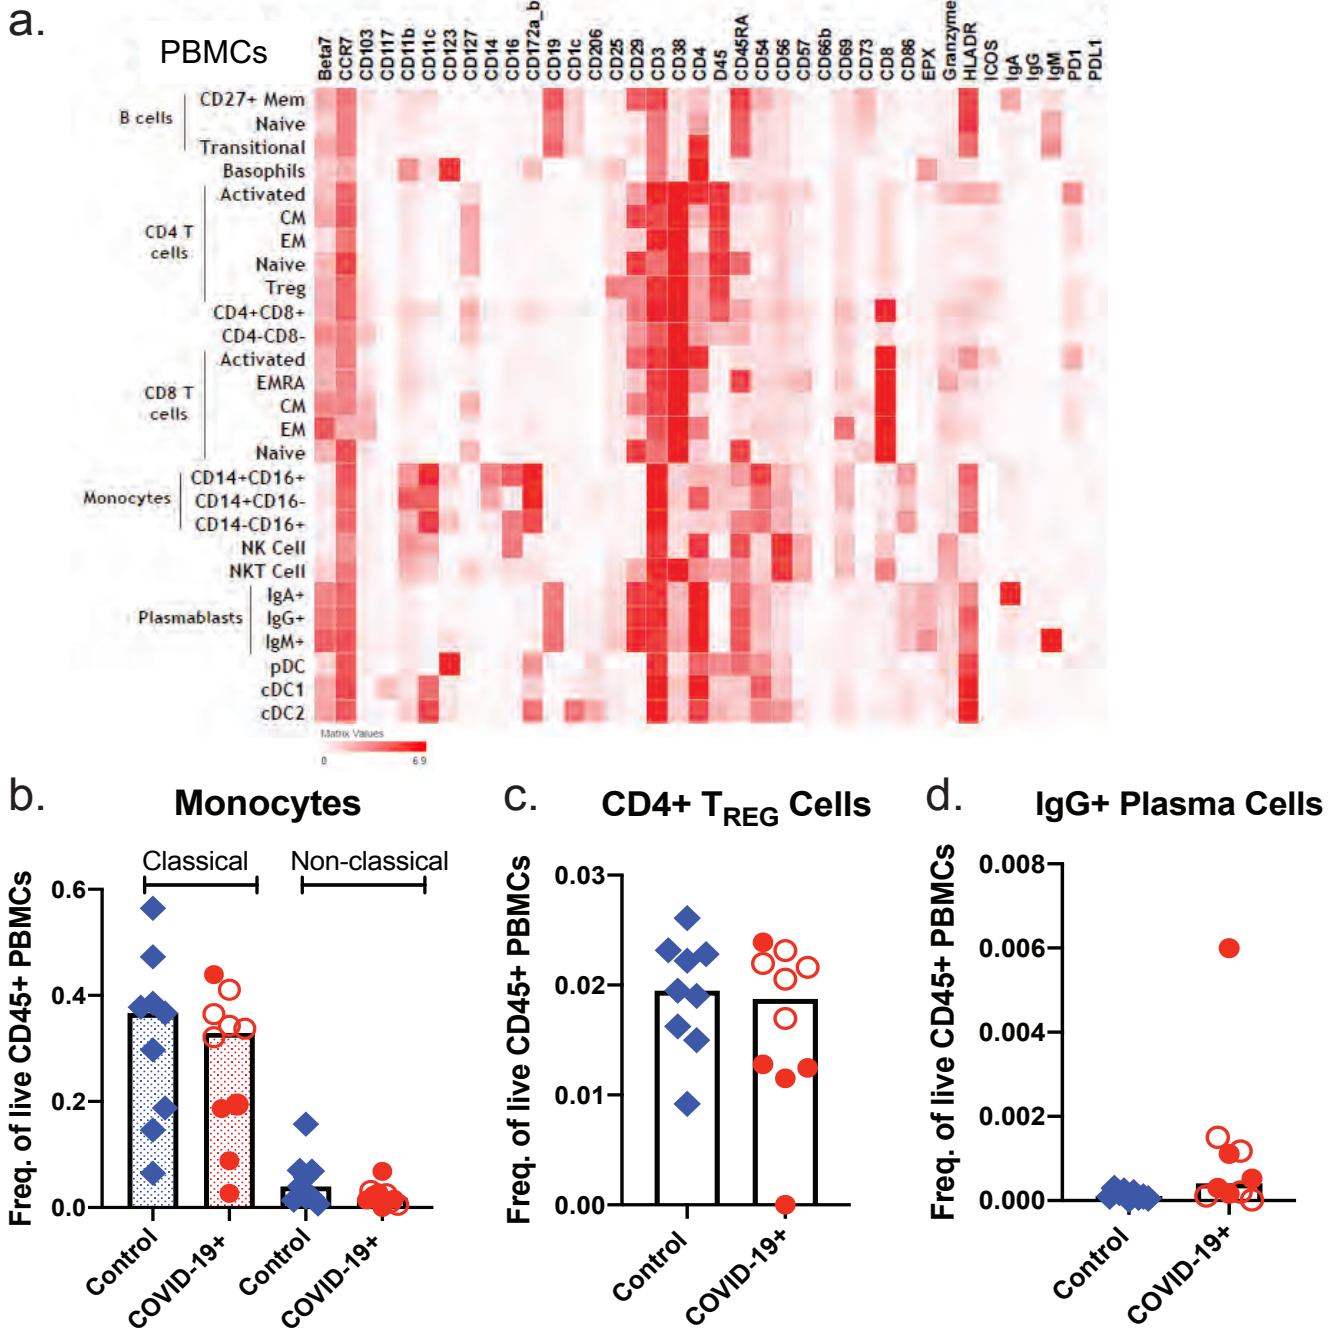

**Altered immune populations in the blood of COVID-19 patients compared to controls.**  
**a.** The heat map shows clustering and distribution of different immune cell types in blood. **b.** The bar plots show distribution of classical (dotted bars) and non-classical monocytes; and **c-d.** the bar plots show the distribution of CD4+ regulatory T cells and IgG+ plasma cells in the blood of COVID-19 patients and controls. Open red circles denote patients with asymptomatic/mild/moderate disease while filled red circles denote patients with severe COVID-19.

# Supplementary Figure 13.

a.

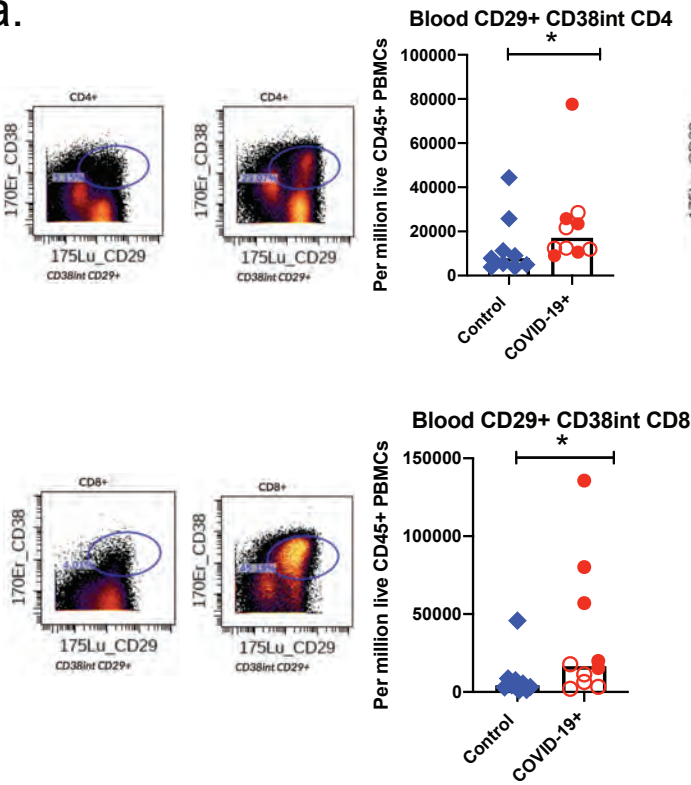

b.

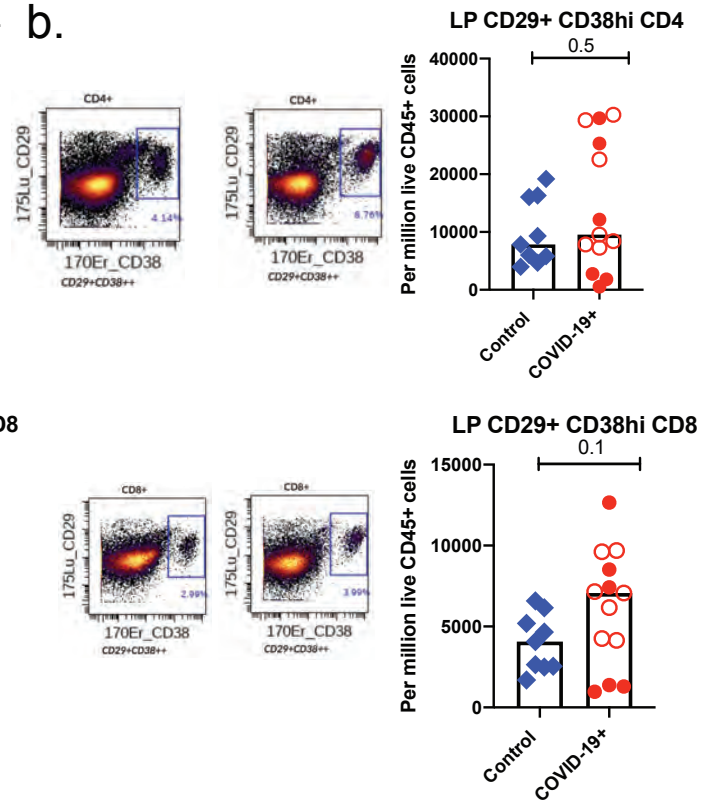

**Altered T cell populations in blood and intestinal biopsies of COVID-19 patients compared to controls based on manual gating of the populations.** Representative raw plots and comparative bar plots showing changes in CD29 +( $\beta$ 1) CD38+ CD4+ and CD29+( $\beta$ 1) CD38+ CD8+ T cells in (a) blood and (b) lamina propria of controls (blue) and COVID-19 patients (red). Open red circles denote patients with asymptomatic/mild/moderate disease while filled red circles denote patients with severe COVID-19.

## Supplementary Figure 14.

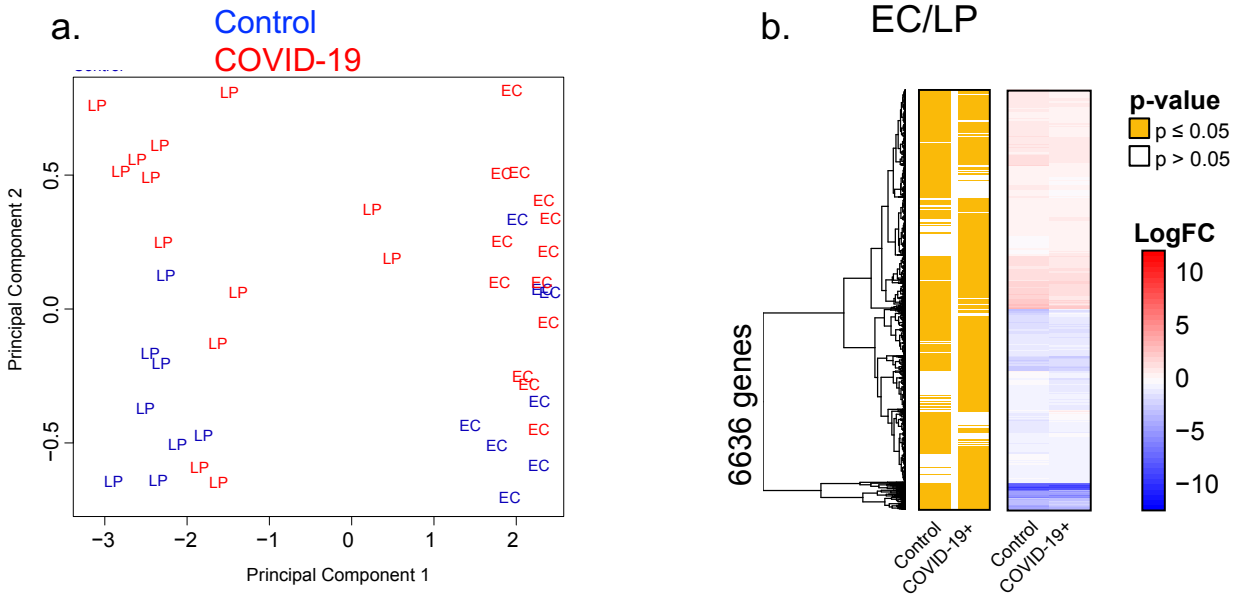

**Expression profiles of tissue fractions indicating the distinctness of both the intestinal compartments, epithelial compartment and lamina propria.** **a**, Principal Component Analysis (PCA) of epithelial compartment (EC) and lamina propria (LP) fractions of COVID-19 patients and controls. The two types of tissue fractions separate on the principal component 1 (x-axis). **b**, Hierarchical clustering of average expression changes for 6636 genes (rows) characterizing the EC (red) or LP (blue) fractions ( $FDR \leq 0.05$ ) in the intestinal biopsies of COVID-19 patients and controls. The panel on the left indicates significant genes for each tissue section in yellow. The color bar indicates the average log<sub>2</sub> fold-change (FC).

# Supplementary Figure 15.

## a. GSEA: COVID-19 infected organoid models

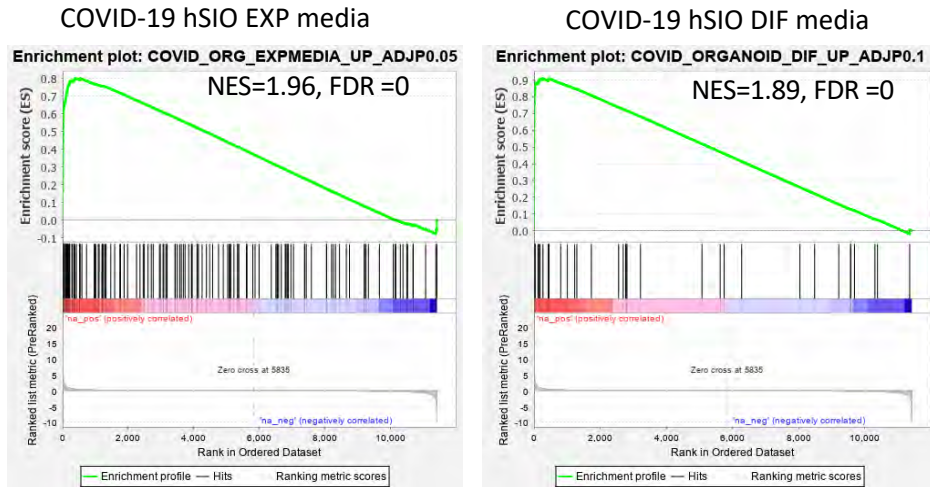

## b. GSEA: Hallmark Pathways

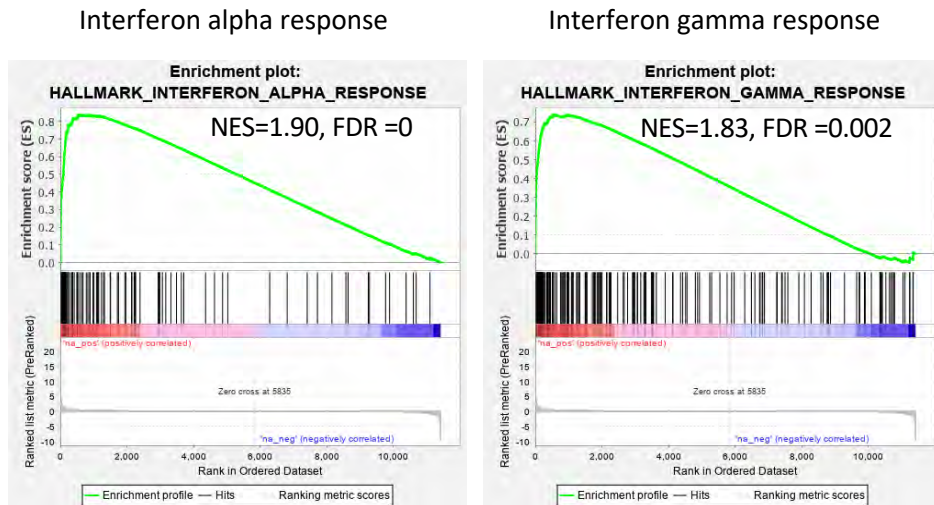

**Immune signature in the epithelial fraction.** A Gene Set Enrichment Analysis (GSEA) was performed using a rank ordered list of genes differentially expressed in the infected Epithelial Compartment (EC) vs control EC comparison. The metric for ranking was  $\log_{FC}^* - \log Pvalue$  and the gene sets in panel **a** that were tested included, molecular signatures curated from COVID-19 infected organoid experimental datasets including hSIOs-COVID-19: human small intestinal organoids (hSIOs) grown in either i) Wnt high expansion (EXP) medium (at  $\text{adj}P < 0.05$ ) or ii) differentiation (DIF) medium (at  $\text{adj}P < 0.1$ ). Only gene sets associated with up-regulated gene sets were found significantly enriched (at  $\text{FDR} < 0.05$ ). **b**, GSEA was performed for the same rank ordered EC gene set using the Hallmark Pathway datasets. Only two significantly enriched pathways associated with genes higher expressed in infected EC relative to control (at  $\text{FDR} < 0.05$ ) were observed. Normalized enrichment score (NES) and FDR values are as indicated.
